# Supplementary material for: Comparative Analysis of the Wood Metabolites of Three Poplar Clones Using UPLC-Triple-TOF-MS
Source: MDPI journal article supplement (doi:10.3390/molecules28207024), 2023-10-11
Supplement: s1 [file Supplementary Materials Table S1 (Metabolites of poplar wood from three clones).xlsx]

## Sheet: Metabolites
Metabolite	M/Z	Formula	Retention time	HMDB Superclass	P1_1	P1_2	P1_3	P1_4	P1_5	P1_6	P2_1	P2_2	P2_3	P2_4	P2_5	P2_6	P3_1	P3_2	P3_3	P3_4	P3_5	P3_6	QC01	QC02	QC03	QC04
Chrysoobtusin	379.083	C19H18O7	0.334433	Benzenoids	3.0229	2.9351	2.9706	2.9745	3.0168	2.9838	3.0585	3.0755	3.0477	3.0887	3.028	3.0298	2.9658	2.9249	2.9459	3.0057	2.9463	2.9033	2.9628	2.958	2.9687	2.9765
1-Methylcyclohexanol	115.111	C7H14O	0.365133	Organic oxygen compounds	3.5092	3.4522	3.4746	3.47	3.5099	3.4651	3.4373	3.4628	3.4185	3.4537	3.4307	3.4036	3.3984	3.3995	3.4077	3.4178	3.3955	3.4213	3.4192	3.3969	3.4025	3.3996
L-Arginine	173.104	C6H14N4O2	0.5927	Organic acids and derivatives	2.481	2.0738	1.5087	1.9972	1.6695	1.9677	1.5759	2.0829	1.7726	1.9146	1.9989	1.3357	1.9281	2.3529	1.4964	1.5656	2.2075	2.3311	2.0767	2.1421	2.0886	2.0983
L-Histidine	156.075	C6H9N3O2	0.609983	Organic acids and derivatives	1.7031	0.5958	1.7623	1.6117	1.7089	1.5861	0.7961	1.7102	1.192	1.6523	1.3309	0.5207	1.7762	1.6274	1.2828	0.5118	1.4179	1.7086	1.4555	1.4125	1.5022	1.5944
2-[(6-carboxy-3,4,5-trihydroxyoxan-2-yl)oxy]-3-hydroxybutanedioic acid	365.011	C10H14O12	0.609983	Organic oxygen compounds	2.0315	1.7174	0.8979	1.206	0.8752	1.4626	0.8465	1.2627	1.1868	0.7789	1.1082	0.8467	1.3918	2.005	0.8571	0.8357	1.7924	1.8631	1.6958	1.6628	1.5536	1.5119
Thiamine	265.111	C12H16N4OS	0.609983	Organoheterocyclic compounds	1.6848	1.8888	2.4475	1.6069	2.3378	2.1468	2.0707	2.0588	1.9551	2.0119	2.1216	2.0635	2.2306	1.4987	1.5477	0.5726	1.446	0.8561	1.9276	2.2041	2.1623	2.0773
6-Succinoaminopurine	236.079	C9H9N5O3	0.619983	Organoheterocyclic compounds	2.2384	2.6326	2.397	2.5466	1.8805	2.3864	2.6182	2.6402	2.6542	2.561	2.7278	2.7174	2.0923	2.2681	2.2408	2.1735	2.0687	2.1528	2.2689	2.2649	2.2767	2.3591
3-Galactosyllactose	549.169	C18H32O16	0.623033	Organic oxygen compounds	4.1146	4.2725	4.109	4.1614	3.9841	4.039	4.0795	4.0889	4.1157	4.0651	4.104	4.0959	3.9243	3.8019	3.9585	3.8403	3.8155	3.9158	4.0161	4.0123	4.0274	4.0281
L-Glutamine	145.062	C5H10N2O3	0.623033	Organic acids and derivatives	2.2495	2.1583	2.1494	2.3851	1.9252	2.375	2.1846	2.3128	2.2585	2.5287	2.1797	1.732	2.5195	2.4463	2.2887	2.0496	2.3662	2.4177	2.3307	2.328	2.3328	2.3296
3-beta-Glucosylcellotriose	711.224	C24H42O21	0.623033	Organooxygen compounds	4.0366	4.2526	4.0555	4.1281	4.1968	3.9006	4.0702	3.9733	4.0521	3.998	4.0824	4.0089	3.8068	3.4931	3.728	3.4497	3.4874	3.6637	3.9998	3.9931	4.0022	3.9809
Lysinoalanine	198.122	C9H19N3O4	0.630483	Organic acids and derivatives	1.6667	2.2777	1.9847	2.2065	1.2458	1.7451	2.3335	2.2681	2.4148	2.2528	2.3749	2.1599	1.5573	1.6581	1.6262	1.3071	1.5442	1.5248	1.7925	1.7439	1.9427	1.7216
1-(sn-Glycero-3-phospho)-1D-myo-inositol	333.059	C9H19O11P	0.633867	Lipids and lipid-like molecules	2.5452	2.334	2.5553	2.503	2.3454	2.6146	2.6351	3.0279	2.8352	2.9539	2.778	2.5751	2.8601	2.6161	2.9601	2.1217	2.6435	2.5682	2.5476	2.5803	2.6804	2.6949
D-glycero-L-galacto-Octulose	277.032	C8H16O8	0.6437	Organic oxygen compounds	3.2171	3.216	2.9126	2.9218	3.1651	3.2688	3.2687	3.3888	3.2062	3.2223	3.2043	3.163	3.267	3.3736	2.9897	3.0696	3.3288	3.2421	3.1567	3.2158	3.2074	3.183
Gentiotriose	539.14	C18H32O16	0.6437	Organic oxygen compounds	4.0448	3.9704	3.9324	3.9911	3.8305	3.9567	3.8353	3.9759	3.8561	3.8864	3.9161	3.8387	3.9089	3.8222	3.8167	3.743	3.6261	3.7987	3.8395	3.8287	3.8368	3.8521
L-NMMA	189.133	C7H16N4O2	0.650483	Organic acids and derivatives	2.3288	2.2999	1.4955	1.9043	1.2958	1.8572	1.6935	2.4836	1.9185	2.1539	2.1399	1.7633	2.0771	2.3969	1.6622	1.7843	2.2848	2.4787	2.0899	2.064	2.102	2.0315
1,4-beta-D-Glucan	535.153	C18H32O18	0.654033	Organic oxygen compounds	4.0416	3.0091	3.466	3.0882	3.2406	3.2553	3.7581	3.4066	3.3102	3.0257	3.347	3.4036	3.2759	3.0911	3.1754	3.395	3.3218	3.8301	3.4679	3.4324	3.4386	3.4109
Melibiose	377.086	C12H22O11	0.654033	Organic oxygen compounds	4.7412	4.6368	4.6846	4.698	4.6139	4.6919	4.6207	4.6725	4.7174	4.7873	4.6927	4.6502	4.7363	4.6558	4.7673	4.7202	4.5819	4.7026	4.6778	4.6846	4.6975	4.705
(S)-b-aminoisobutyric acid	104.07	C4H9NO2	0.660483	Organic acids and derivatives	2.6192	2.5835	1.9612	2.3426	2.1601	2.6187	2.3121	2.446	2.2785	2.4198	2.3349	2.3939	2.3743	2.6408	2.517	2.4008	2.6016	2.5751	2.4772	2.4358	2.4313	2.4057
4-Deoxytetronic acid	87.0437	C4H6O2	0.660483	Organic oxygen compounds	2.228	2.1708	1.624	1.9795	1.6904	2.2325	1.9153	1.947	2.0001	1.9313	1.7455	1.9386	1.9583	2.2706	2.1684	1.9935	2.2485	2.2193	1.9808	2.1621	2.0215	1.9241
1-Methylinosine	609.191	C11H14N4O5	0.663867	Nucleosides, nucleotides, and analogues	3.415	3.3723	3.6085	3.5304	3.3632	3.4639	3.3257	3.2747	3.2705	3.3202	3.3473	3.5647	3.5229	3.4129	3.4521	3.564	3.4391	3.4487	3.4701	3.4516	3.4889	3.4621
Aminohydroxybutyric acid	84.0442	C4H9NO3	0.670983	-	2.7038	2.7587	2.7295	2.832	2.3597	2.822	2.4917	2.456	2.3513	2.5765	2.4418	2.2839	2.5735	2.7685	2.4807	2.3238	2.5597	2.6364	2.5545	2.6336	2.5083	2.4708
3-Hydroxy-L-proline	304.15	C5H9NO3	0.670983	Organic acids and derivatives	2.5354	2.5566	2.466	2.4911	2.5704	2.6217	2.0245	2.1231	2.4334	2.3284	2.3452	2.5221	2.4094	2.1653	2.2889	1.9869	2.3584	2.413	2.3649	2.2382	2.1947	2.2114
L-Glutamate	130.049	C5H9NO4	0.670983	Organic acids and derivatives	3.4704	3.5894	3.5639	3.7679	3.1558	3.6905	3.4313	3.3569	3.3292	3.5534	3.338	3.2436	3.4898	3.5326	3.3605	3.2291	3.4329	3.4674	3.4072	3.3781	3.4159	3.4044
Erythronic acid	135.03	C4H8O5	0.674033	Organic oxygen compounds	2.975	2.9815	2.7272	2.9425	2.7604	3.0294	2.8851	3.0122	2.8746	2.7601	2.8735	2.9085	2.79	3.0108	2.8363	2.9326	3.0574	2.8985	2.9002	2.9225	2.9393	2.9358
Liquiritigenin 4'-[3-acetylapiosyl-(1->2)-glucoside]	606.192	C28H32O14	0.68115	Phenylpropanoids and polyketides	3.0039	3.3352	3.2101	3.3349	2.4208	2.9878	2.893	2.8387	2.7471	2.7598	3.004	2.9635	2.6481	2.6001	2.7669	2.7433	2.5681	2.5912	2.7209	2.6296	2.7225	2.7154
Kaempferol 3-[2''-(6'''-coumaroylglucosyl)-rhamnoside] 7-glucoside	452.13	C42H46O22	0.68115	Phenylpropanoids and polyketides	1.6804	1.8772	1.6624	2.0931	1.2778	1.803	1.7094	2.1581	1.758	1.6086	2.1175	1.432	1.4232	1.8485	2.0558	2.0184	1.8281	1.5986	1.5477	1.6473	1.5422	1.5343
Inulobiose	723.195	C12H22O11	0.68115	Organooxygen compounds	3.8	3.6008	3.5822	3.521	3.611	3.6421	3.6039	3.433	3.5141	3.5299	3.5726	3.7382	3.6014	3.5465	3.7171	3.8757	3.6311	3.713	3.5366	3.522	3.4584	3.4838
Trigonelline	138.054	C7H7NO2	0.691483	-	3.6601	3.6713	3.844	3.7943	3.5562	3.7876	3.6514	3.6547	3.7416	3.6774	3.6902	3.5681	3.041	3.0833	3.1294	2.7897	2.9172	3.0922	3.5452	3.4633	3.4664	3.4621
D-Glucose	402.16	C6H12O6	0.691483	Organic oxygen compounds	1.7272	2.2795	2.3068	2.619	1.3145	2.0695	1.9401	2.0416	1.5515	1.3654	1.8752	1.9108	1.8616	1.8973	2.0191	1.7959	1.8887	2.0655	1.7035	1.7642	1.8102	1.9086
A-L-Arabinofuranosyl-(1->2)-[a-D-mannopyranosyl-(1->6)]-D-mannose	473.153	C17H30O15	0.694367	Organic oxygen compounds	3.7237	3.6581	3.6908	3.8352	3.468	3.6579	3.501	3.5566	3.512	3.6572	3.4924	3.509	3.5715	3.558	3.4883	3.6506	3.5025	3.5952	3.5502	3.5418	3.5729	3.5671
Uridine monophosphate (UMP)	323.028	C9H13N2O9P	0.694367	-	1.9935	1.8016	1.9571	2.177	2.0479	2.1413	2.6423	2.4195	2.7634	2.7961	2.5121	2.401	2.5534	2.239	2.7291	2.17	2.5793	2.5754	2.3616	2.3804	2.5082	2.2843
D-1,5-Anhydrofructose	127.038	C6H10O5	0.70165	Organoheterocyclic compounds	3.5435	3.6139	3.4898	3.4838	3.3674	3.5179	3.4709	3.45	3.4823	3.4507	3.4514	3.3527	3.4033	3.3549	3.5454	3.3308	3.4221	3.5011	3.3971	3.3636	3.3886	3.3889
2-Deoxy-L-ribono-1,4-lactone	97.0278	C5H8O4	0.70165	Organoheterocyclic compounds	2.8936	2.8497	2.7919	2.8481	2.5717	2.7371	2.709	2.6555	2.6755	2.6758	2.6867	2.6498	2.8394	2.6867	2.7978	2.4718	2.6642	2.6734	2.6303	2.6364	2.5928	2.6464
6-Kestose	487.165	C18H32O16	0.70165	Organic oxygen compounds	3.6034	3.8087	3.6213	3.6471	3.4468	3.505	3.579	3.4976	3.5907	3.5269	3.6118	3.5212	3.5079	3.2728	3.6557	3.1428	3.3482	3.5156	3.4515	3.448	3.4034	3.4283
Glutamylglycine	472.165	C7H12N2O5	0.70165	Organic acids and derivatives	2.0766	2.6164	2.5318	2.6041	1.5523	2.3214	1.5648	1.472	1.4006	1.9117	1.9499	1.6143	1.5878	1.4151	2.0444	1.1962	1.283	1.978	1.9183	1.82	1.7602	1.9565
L-Proline	116.07	C5H9NO2	0.70165	Organic acids and derivatives	2.7245	2.691	2.4498	2.5413	2.3994	3.03	2.3984	2.5026	2.3577	2.6744	2.3149	2.4292	2.487	2.7659	2.4133	2.5021	2.6499	2.7481	2.5241	2.5638	2.5412	2.5074
Glucosylgalactosyl hydroxylysine	521.173	C18H34N2O13	0.704367	Lipids and lipid-like molecules	2.9851	2.8986	2.7443	2.7822	2.8299	2.9421	2.9563	2.9849	2.9196	2.937	2.977	2.9203	3.0709	2.9781	2.945	3.1039	2.8817	2.9241	2.9619	2.8727	2.9187	2.9735
Arabinofuranobiose	281.088	C10H18O9	0.714367	Organic oxygen compounds	2.5415	1.9168	2.3239	1.9949	2.4118	2.1265	2.1248	2.223	1.8717	1.6971	2.2143	2.5404	2.6406	2.5432	2.3431	2.6977	2.3704	2.3686	2.3666	2.4665	2.3248	2.2798
Lepidimoic acid	321.082	C12H18O10	0.724367	Organooxygen compounds	3.1937	2.9306	3.4249	3.1821	3.8541	3.2908	3.3818	3.4641	2.9701	3.2329	3.1587	3.2714	3.1173	2.9872	3.0136	3.1864	3.0047	2.9788	3.1394	3.1631	3.1683	3.139
Adenosine 3'-monophosphate	348.07	C10H14N5O7P	0.732483	Nucleosides, nucleotides, and analogues	3.118	3.1838	2.837	2.9668	2.9271	3.1426	2.9672	3.0006	3.005	3.016	2.9756	2.8383	2.9234	3.0831	3.145	2.7293	3.0878	3.1373	2.8956	2.7903	2.9085	2.8467
Isovitexin 2''-(6'''-p-coumaroylglucoside)	761.175	C36H36O17	0.734533	Phenylpropanoids and polyketides	2.4808	1.9189	2.795	2.5518	3.1773	2.6747	2.8671	2.9453	2.1048	2.6324	2.6408	2.7825	2.3138	2.2725	2.0044	2.3536	2.3409	2.225	2.5807	2.4197	2.4834	2.4558
Adenine	136.061	C5H5N5	0.753133	Organoheterocyclic compounds	3.1537	3.2809	3.1294	3.1658	2.7404	3.2468	2.901	2.8314	2.8006	2.7402	2.6649	2.959	2.8057	2.8278	2.6831	2.8331	2.8849	2.8122	2.8614	2.8567	2.8605	2.8475
Acetylcholine	146.116	C7H15NO2	0.7633	Organic nitrogen compounds	2.7539	3.0029	3.037	2.9482	2.8262	2.964	2.7824	2.6188	2.9102	2.8141	2.782	2.8319	2.7331	2.4842	2.7846	2.6449	2.7079	2.7922	2.789	2.7687	2.7226	2.7799
Maleic acid	96.9612	C4H4O4	0.764867	Organic acids and derivatives	4.1684	4.0271	4.1485	4.112	4.2308	4.1195	4.2606	4.2401	4.1949	4.2256	4.26	4.3013	4.026	3.9604	4.0191	4.0938	3.9777	4.08	4.1102	4.1151	4.1367	4.1353
L-Malic acid	133.015	C4H6O5	0.764867	Organic acids and derivatives	4.2672	4.2545	4.192	4.2474	4.1197	4.2878	4.3118	4.3235	4.2789	4.3478	4.3214	4.322	4.0845	4.0735	4.1639	4.2024	4.0691	4.1222	4.2398	4.2409	4.2504	4.2704
Nepsilon-Acetyl-L-lysine	189.122	C8H16N2O3	0.773633	-	2.3216	2.4442	2.0914	2.2077	2.6928	2.4178	2.2544	2.0421	1.8641	2.2371	2.1203	2.1618	1.1812	1.2086	1.0403	1.0177	1.061	1.3806	1.9664	1.9574	1.9691	1.9516
4-Guanidinobutanoic acid	146.091	C5H11N3O2	0.773633	Phenylpropanoids and polyketides	3.1052	2.8744	2.6232	2.7883	2.7471	2.8649	2.6316	2.6282	2.5853	2.5745	2.825	2.5907	2.7084	3.1508	2.5791	2.6588	3.0065	3.2441	2.8087	2.7419	2.7914	2.7784
5-Aminopentanoic acid	118.085	C5H11NO2	0.794317	Organic acids and derivatives	3.2783	3.1053	3.0279	3.2259	3.0817	3.3007	3.0807	3.0167	2.9712	3.033	3.0593	3.1199	3.2765	3.2485	3.1638	3.0527	3.2489	3.3592	3.0595	3.0385	3.0716	3.0161
N-(1-Deoxy-1-fructosyl)valine	280.139	C11H21NO7	0.8043	Organic acids and derivatives	3.8843	3.3845	2.9841	3.0014	2.8978	3.5747	3.0407	3.0954	3.0477	2.9021	3.3651	2.9644	3.2205	3.5637	3.2222	3.2072	3.3877	3.2293	3.2475	3.2077	3.2112	3.2049
N-(3-Methylbutyl)acetamide	98.096	C6H13NO	0.8043	Organic acids and derivatives	1.6288	1.8361	1.5677	1.6909	1.6416	1.8124	1.8119	1.7042	1.6987	1.7728	1.8586	1.6412	0.5192	0.553	0.832	0.5131	0.5466	0.5179	1.4842	1.5426	1.5335	1.527
1-Aminocyclohexanecarboxylic acid	144.101	C7H13NO2	0.8043	Lipids and lipid-like molecules	3.3807	3.3716	3.2221	3.2776	3.2372	3.4867	3.3819	3.2367	3.2118	3.2814	3.3846	3.5496	2.7823	2.7722	2.9968	2.5026	2.6597	2.7552	3.1467	3.1021	3.1066	3.1053
Glutathione, oxidized	307.084	C20H32N6O12S2	0.845967	-	3.378	3.7389	3.5492	3.4883	3.4061	3.7072	3.4045	3.3023	3.4868	3.6916	3.4615	3.3701	3.4626	3.2888	3.6901	3.3674	3.4836	3.7224	3.4181	3.3735	3.3668	3.3504
Torososide B	478.141	C40H52O25	0.845967	Organic oxygen compounds	2.4253	2.8571	2.7503	2.7143	2.1866	2.9245	2.1666	2.3718	2.4195	2.597	2.4134	2.3342	2.6274	2.2647	2.6767	2.455	2.3058	2.6757	2.6041	2.5435	2.5065	2.5423
Kaempferol 3-arabinofuranoside 7-rhamnofuranoside	609.124	C26H28O14	0.8778	Phenylpropanoids and polyketides	2.3204	1.4779	1.9907	1.6119	2.2345	1.9836	2.2337	2.391	2.1851	1.9619	2.0276	2.2202	2.7474	1.0747	1.5226	1.3893	1.4223	0.9882	2.5099	2.4277	2.4314	2.4159
Myricetin 3-[glucosyl-(1->2)-rhamnoside] 7-[rhamnosyl-(1->2)-glucoside]	899.238	C39H50O26	0.898633	-	2.19	2.5443	2.537	2.77	1.6398	2.5491	1.964	1.7038	1.5461	1.754	2.2022	2.4369	2.2092	2.0056	2.3939	2.1691	1.9519	2.0176	2.0475	2.1143	2.1083	2.0446
Niacinamide	123.054	C6H6N2O	0.898633	Organoheterocyclic compounds	3.0554	3.0994	2.9972	3.0555	2.8193	3.1287	2.8247	2.7405	2.8039	2.8084	2.8175	2.9284	2.9428	2.9185	2.9016	2.8634	2.943	2.9206	2.8222	2.8032	2.7782	2.7675
Benazeprilat	431.14	C22H24N2O5	0.90585	Organic acids and derivatives	2.8975	2.7038	2.9103	2.813	3.3028	3.1395	2.8131	3.0459	3.0914	3.0477	3.0258	3.1556	3.1237	3.1231	2.945	2.6857	2.7231	3.0228	2.9619	2.9705	2.9471	2.9748
Salicin	328.138	C13H18O7	0.9198	Organic oxygen compounds	0.905	1.3862	0.8929	0.905	1.5039	0.8392	0.3728	0.3499	0.5102	0.3286	1.2366	1.4477	1.8806	1.3307	1.0111	0.8521	1.5142	1.7409	2.1981	2.1876	2.1407	2.1332
2-(6-carboxy-3,4,5-trihydroxyoxan-2-yl)propanedioic acid	322.076	C9H12O10	0.929967	Organic oxygen compounds	2.7562	2.7046	2.8785	3.0577	2.7518	2.8527	2.5324	2.6089	2.3046	2.3823	2.533	2.6902	2.7855	2.7564	2.5801	2.7239	2.5828	2.693	2.6318	2.6584	2.5517	2.6191
(R)-(+)-2-Pyrrolidone-5-carboxylic acid	130.049	C5H7NO3	0.962467	Organic acids and derivatives	3.6684	3.4535	3.4387	3.704	3.1951	3.643	3.3895	3.3192	3.3712	3.4909	3.331	3.2224	3.6597	3.7308	3.4639	3.2738	3.5407	3.6722	3.3841	3.3634	3.3453	3.3554
Uracil	113.034	C4H4N2O2	0.962467	Organoheterocyclic compounds	2.6735	2.7996	2.549	2.7693	2.4635	2.6299	2.6763	2.3281	2.5409	2.6063	2.4585	2.6023	2.4461	2.5744	2.5181	2.4744	2.5425	2.5042	2.1616	1.9343	1.9662	1.9186
L-Tyrosine	182.08	C9H11NO3	1.03695	Organic acids and derivatives	3.1316	2.9333	3.1776	2.8352	3.0321	3.0469	2.8374	2.9912	2.6562	2.6528	2.9822	2.8217	2.7319	3.0108	2.85	2.925	2.9346	2.8943	2.7481	2.744	2.7154	2.7343
Melatonin glucuronide	429.125	C19H24N2O8	1.07102	Nucleosides, nucleotides, and analogues	2.8717	2.7307	2.8557	2.8533	2.813	2.6328	2.7116	2.5979	2.7724	2.7541	2.7676	2.8739	2.7328	2.5123	2.7836	2.7359	2.7952	2.7843	2.8178	2.8261	2.7974	2.8207
N-(1-Deoxy-1-fructosyl)serine	312.095	C9H17NO8	1.07102	Organic acids and derivatives	1.2136	1.2362	0.4862	1.425	1.1067	1.3309	1.1983	1.1286	1.3801	1.221	0.9575	1.3447	1.4757	1.7151	1.2451	1.39	1.7746	1.6382	1.3459	1.3346	1.2181	1.1738
Quinic acid	383.119	C7H12O6	1.08723	Organoheterocyclic compounds	1.8237	1.3776	1.6544	1.5691	1.5043	1.2278	1.328	1.3133	1.5598	1.0223	1.5485	1.7809	1.5791	1.3471	1.4371	1.5219	1.6189	1.6992	1.5593	1.5363	1.5088	1.6101
3-(5-Methyl-2-furyl)prop-2-enal	135.044	C8H8O2	1.12002	Organoheterocyclic compounds	2.5777	2.4001	2.2947	2.2152	2.2501	2.3798	2.2641	2.3553	2.3386	2.2567	2.323	2.3088	2.5003	2.5165	2.5818	2.5077	2.4723	2.4204	2.3723	2.3503	2.3666	2.3667
Guanosine	284.098	C10H13N5O5	1.12195	Nucleosides, nucleotides, and analogues	2.7764	2.8191	2.6457	2.962	2.869	2.7611	2.6541	2.4294	2.5568	2.5428	2.4754	2.7347	2.5857	2.7571	2.6346	2.6736	2.8225	2.7277	1.7842	1.7805	1.7911	1.7309
Inosine	269.088	C10H12N4O5	1.15495	Nucleosides, nucleotides, and analogues	2.7693	2.8055	2.4498	2.6993	2.6184	2.6873	2.6071	2.2604	2.5366	2.7272	2.5083	2.7125	2.4724	2.6103	2.6549	2.1881	2.5809	2.5571	2.1049	2.0882	2.0292	2.0047
N-Acetylthreonine	142.051	C6H11NO4	1.16183	Organic acids and derivatives	2.898	2.9371	2.6877	2.6678	2.7002	2.7719	2.7752	2.8901	2.8204	2.6894	2.7975	2.7624	2.6448	2.863	2.8269	2.5315	2.7605	2.8314	2.7998	2.826	2.8508	2.8175
1-(Malonylamino)cyclopropanecarboxylic acid	188.054	C7H9NO5	1.17628	Organic acids and derivatives	3.3292	3.3932	3.2147	3.2018	3.1369	3.2367	3.1506	3.1597	3.0951	3.0086	3.1547	3.1506	3.0765	3.234	3.1654	2.884	3.1708	3.2369	2.7902	2.76	2.7082	2.7333
6''-O-Acetylglycitin	552.15	C24H24O11	1.17628	Phenylpropanoids and polyketides	2.4069	2.5333	2.4051	2.4664	2.197	2.3984	2.2666	2.2288	2.168	2.0736	2.2811	2.3701	2.1748	2.3366	2.3399	1.9173	2.2391	2.3169	1.9723	2.0061	1.8558	1.8906
L-trans-alpha-Amino-2-carboxycyclopropaneacetic acid	142.049	C6H9NO4	1.17628	Organic acids and derivatives	2.5132	2.5819	2.393	2.3916	2.3246	2.4066	2.3476	2.336	2.2954	2.1695	2.3517	2.3301	2.2495	2.4173	2.3728	2.0864	2.3599	2.4013	2.0097	1.9691	1.9238	1.8975
4-Hydroxy-2-oxobutanoic acid	101.023	C4H6O4	1.18645	Organic acids and derivatives	2.6028	2.5999	2.5272	2.6505	2.3333	2.6188	2.3694	2.179	2.3134	2.3409	2.3703	2.4331	2.254	2.1357	2.2879	2.4096	2.2168	2.2585	2.1874	2.156	2.0908	2.1428
Oxoadipic acid	205.035	C6H8O5	1.20467	Organic acids and derivatives	1.9279	1.9851	1.963	2.0909	1.9582	1.9769	2.2831	2.0823	1.7801	1.7843	2.0251	2.3615	2.068	2.0363	1.8605	2.1593	2.1021	2.0574	2.2264	2.1943	2.2556	2.2115
Cis,cis-Muconic acid	143.033	C6H6O4	1.20745	Lipids and lipid-like molecules	2.4484	2.358	2.5002	2.5035	2.5122	2.4981	2.2763	2.2392	2.1969	2.0111	2.3941	2.3403	2.3888	2.4522	2.0955	2.2835	2.6377	2.3341	2.058	2.0935	2.0328	2.0532
3,4,5-trihydroxy-6-(2-hydroxyethoxy)oxane-2-carboxylic acid	219.051	C8H14O8	1.21517	Organic oxygen compounds	1.6047	1.2365	1.2974	1.0127	1.6753	1.4293	1.6845	1.3842	1.1772	0.9544	1.4444	2.0376	1.6876	1.7276	1.2409	1.8961	1.732	1.6143	1.4968	1.6733	1.5509	1.6127
(2S)-2-{[1-(R)-Carboxyethyl]amino}pentanoate	190.106	C8H15NO4	1.22845	-	2.1989	1.8012	1.5268	1.7488	1.8237	2.0197	1.7582	1.7369	1.7096	1.6065	1.8422	2.1198	1.9975	2.0641	1.6318	1.6313	2.253	1.9509	1.7336	1.7689	1.6314	1.5994
3-hydroxy-3-methyl-Glutaric acid	161.045	C6H10O5	1.24183	Lipids and lipid-like molecules	3.0416	3.0756	3.1525	3.072	2.9529	3.0565	2.9976	2.9355	2.942	2.9656	3.1613	3.1799	3.2996	3.3324	3.3904	3.0691	3.3416	3.5498	3.208	3.1966	3.2159	3.201
L-Isoleucine	132.101	C6H13NO2	1.24962	Organic acids and derivatives	3.7454	3.5504	3.681	3.6209	3.6386	3.8088	3.5098	3.4913	3.3677	3.4757	3.5732	3.5939	3.7308	3.7507	3.5704	3.643	3.7441	3.8055	3.3111	3.2915	3.2674	3.2481
2-[(sulfooxy)methyl]butanoic acid	395.03	C5H10O6S	1.28283	Lipids and lipid-like molecules	1.7922	2.0448	1.8796	1.9936	1.6867	1.87	1.6588	1.3457	1.0525	0.7036	0.8891	1.6344	0.085	0.3639	0.0888	0.4958	1.4753	0.087	1.3658	1.4513	1.4365	1.4674
2S-hydroxy-Hexanedioic acid	163.059	C6H10O5	1.29845	-	2.271	2.2579	2.3649	2.3078	2.1678	2.2449	2.0768	2.0622	2.087	2.0466	2.2532	2.3025	2.415	2.4793	2.4877	2.2458	2.4914	2.6345	2.166	2.2131	2.1897	2.1723
Glutamylhistidine	265.092	C11H16N4O5	1.33133	Organic acids and derivatives	1.5599	1.1663	1.6775	1.683	1.8449	1.523	0.3547	0.9452	0.7292	0.825	1.0265	0.8341	0.7426	0.4727	0.3266	0.9551	0.8628	0.3217	1.2229	1.1285	0.9907	1.2406
N-(3S-hydroxy-butanoyl)-homoserine lactone	188.091	C8H13NO4	1.33977	-	1.6493	1.5987	1.4628	1.4311	1.3905	1.6873	1.5066	1.3734	1.5197	1.3302	1.4895	1.6103	1.8733	1.7966	1.6809	1.5773	1.7113	1.7114	1.0748	1.2709	1.2225	1.3366
Isovalerylglucuronide	259.082	C11H18O8	1.36233	Organic oxygen compounds	1.8142	2.018	1.2552	1.4528	1.6061	1.5108	1.4087	1.1093	1.6153	1.5639	1.3058	1.3525	1.9151	1.9005	2.0291	1.8319	1.8221	2.0666	1.7424	1.8257	1.7811	1.8769
Ethylvanillin glucoside	373.114	C15H20O8	1.36233	Organic oxygen compounds	2.5281	2.4954	2.7544	2.7357	2.6161	2.5508	2.5126	2.3872	2.3561	2.339	2.5159	2.5698	2.1582	2.0671	2.0948	2.0661	2.4497	2.1116	2.473	2.4903	2.4969	2.4981
N-(1-Deoxy-1-fructosyl)tyrosine	344.133	C15H21NO8	1.37027	Organic acids and derivatives	1.972	1.7932	2.1361	2.036	1.8114	1.8682	1.7076	1.5176	1.4144	1.4814	1.7974	1.8573	2.4296	2.1324	2.1968	2.2005	2.4339	2.2895	1.4244	1.4092	1.2597	1.3925
Ethyl salicylate	165.055	C9H10O3	1.37317	Benzenoids	2.7238	2.8737	2.5012	2.6164	2.5928	2.5972	2.5522	2.5155	2.6295	2.6157	2.5342	2.6014	2.8114	2.7466	2.8918	2.7354	2.7571	2.9058	2.7439	2.7439	2.7614	2.752
Xanthosine	283.069	C10H12N4O6	1.38315	Nucleosides, nucleotides, and analogues	1.6779	1.4528	1.0852	1.0918	1.4885	1.3899	1.6234	1.0383	1.0282	1.298	1.0136	1.2636	1.2054	1.492	1.1393	1.0406	1.5596	1.3641	1.3441	1.4889	1.3118	1.3862
N-Acetyllactosamine	364.124	C14H25NO11	1.39382	Organic oxygen compounds	1.9827	1.4576	1.8589	1.9014	2.4902	1.7562	1.4671	1.0049	1.0717	1.2002	1.5428	2.3315	2.1617	2.0477	1.734	2.4076	1.8482	1.908	1.9041	1.9775	1.9524	1.9594
Coumarin	147.043	C9H6O2	1.43243	Phenylpropanoids and polyketides	1.9115	2.1862	1.799	1.9673	1.8437	1.9265	1.7267	1.674	1.8018	1.7368	1.6675	1.7958	2.076	1.9958	2.1285	2.0139	2.0287	2.1003	1.5195	1.5357	1.5233	1.6188
Gallic acid	169.014	C7H6O5	1.46298	Benzenoids	1.606	1.4845	0.3072	0.7804	1.0195	1.5292	0.8847	1.6249	0.8567	0.3767	1.8534	1.9832	1.1147	1.7924	1.0906	0.47	2.8408	1.0928	1.8413	1.8949	1.8795	1.9037
N-(gamma-Glutamyl)ethanolamine	155.08	C7H14N2O4	1.46393	Organic acids and derivatives	1.6207	1.6385	1.6599	1.5732	1.5417	1.9201	1.5747	1.8058	1.6574	1.951	1.6834	1.8001	2.1786	1.8685	1.7283	1.5888	1.9838	2.3586	1.6734	1.6272	1.5715	1.6414
Trans-1,2-Dihydrobenzene-1,2-diol	157.05	C6H8O2	1.53798	Organic oxygen compounds	2.1354	1.6145	2.285	2.5157	2.6228	1.9963	3.1282	2.2219	2.0053	1.8665	2.0439	2.6342	1.7136	2.5383	1.8165	2.7625	2.6052	2.1411	2.4147	2.4199	2.4337	2.4261
Isopropyl beta-D-glucoside	243.087	C9H18O6	1.55882	Organic oxygen compounds	2.7247	2.6308	2.5736	2.5846	2.4489	2.6757	2.4843	2.5736	2.628	2.5651	2.5319	2.5356	2.5581	2.6506	2.6639	2.5923	2.5996	2.6289	2.6387	2.6517	2.6334	2.6341
HERNIARIN	177.053	C10H8O3	1.65642	Phenylpropanoids and polyketides	1.6769	1.7855	1.6853	1.706	1.5789	1.8315	1.4955	1.6061	1.6493	1.5754	1.5437	1.6023	1.7797	1.708	1.7615	1.6503	1.7621	1.7192	1.0344	1.1599	1.2442	1.0263
Isopropyl apiosylglucoside	399.151	C14H26O10	1.68547	Organic oxygen compounds	1.237	0.2954	0.2832	0.2999	0.2928	0.3112	0.2908	0.2724	0.2672	0.2472	0.2789	0.2943	2.8932	2.4789	2.5304	2.6959	2.7831	2.7679	2.0216	2.0965	2.0791	2.0601
4-O-alpha-D-Galactopyranosylcalystegine B2	320.133	C13H23NO9	1.77025	Organic oxygen compounds	2.3634	2.3345	2.3304	2.5275	2.5693	2.5555	2.4076	2.54	2.4133	2.2019	2.467	2.3236	1.967	2.0349	1.9757	2.1343	2.3632	1.8865	2.0639	1.9407	1.9956	2.007
Benzoic acid	123.043	C7H6O2	1.86225	Benzenoids	1.4517	1.5826	1.6815	1.7445	1.7153	1.8089	1.5254	1.531	1.3956	1.3037	1.5225	1.4971	1.4201	1.5913	1.3893	1.5925	1.5601	1.3732	1.2815	1.2557	1.0416	1.2144
3-(2-Hydroxyphenyl)propionic acid	167.069	C9H10O3	1.97973	Phenylpropanoids and polyketides	1.7793	1.6769	1.6225	1.6569	1.6265	1.7522	1.5914	1.6624	1.5559	1.5768	1.5475	1.6329	1.5469	1.6339	1.7175	1.6143	1.5954	1.5753	1.6618	1.5873	1.5963	1.7505
N-(1-Deoxy-1-fructosyl)phenylalanine	328.138	C15H21NO7	2.04107	Organic acids and derivatives	3.1597	2.8259	2.5005	2.4531	2.5601	2.6784	2.5786	2.5828	2.2877	2.0381	2.4091	2.3977	2.5627	3.1013	2.8506	3.0496	2.8996	2.7549	2.5545	2.5489	2.5132	2.5849
L-Phenylalanine	166.085	C9H11NO2	2.04107	Organic acids and derivatives	3.0479	3.076	3.1086	3.1384	2.9866	3.003	3.0142	2.9767	2.9295	2.8525	2.9394	2.9796	3.0626	3.2932	3.2854	3.3836	3.316	3.2574	3.1256	3.0959	3.0699	3.1192
2-Hydroxyphenethylamine	120.08	C8H11NO	2.04107	Organic nitrogen compounds	2.7245	2.7364	2.8054	2.8166	2.6683	2.6525	2.7113	2.6644	2.6249	2.5512	2.623	2.6351	2.7451	2.9873	2.9972	3.0847	3.0044	2.9546	2.687	2.674	2.6618	2.7218
Lacto-N-biose I	348.128	C14H25NO11	2.1044	Organic oxygen compounds	2.3836	2.2648	2.5451	2.4015	2.6941	2.4713	2.2504	2.0767	2.1536	2.1232	2.2117	2.4848	2.556	2.4213	2.3846	2.3607	2.4971	2.4233	2.097	2.0536	2.1047	2.0826
4,5-Dimethoxy-1,2-benzenedicarboxylic acid	227.054	C10H10O6	2.29505	Benzenoids	2.3515	2.252	2.3375	2.2162	2.243	2.284	2.3173	2.2496	2.3016	2.122	2.0634	2.2742	2.2746	2.3122	2.3657	2.3449	2.319	2.4154	2.1527	2.0659	2.0981	2.1501
Xi-2,3-Dihydro-3,5-dihydroxy-6-methyl-4H-pyran-4-one	181.048	C7H10O4	2.29505	Organoheterocyclic compounds	2.3775	2.2953	2.3436	2.313	2.2725	2.3424	2.3333	2.3063	2.3484	2.1224	2.1169	2.2936	2.2882	2.3031	2.4263	2.3433	2.3422	2.4174	2.1638	2.1154	2.1491	2.1738
Sinapine	355.161	C16H24NO5+	2.42643	Phenylpropanoids and polyketides	1.7384	1.6272	1.753	1.2015	0.9152	1.7667	1.7188	2.091	1.8586	1.7753	1.9408	0.4242	1.9605	1.8974	2.1056	1.3964	1.4399	1.807	1.7273	1.7039	1.7208	1.7615
4-Hydroxyphthalide	149.024	C8H6O3	2.43777	Organoheterocyclic compounds	1.3389	1.4678	1.3071	1.1282	0.977	1.3975	1.2778	1.2723	1.025	0.9103	1.2457	0.9776	1.5816	1.5646	1.8001	1.6085	1.3995	1.809	1.3957	1.3594	1.2975	1.2164
1,4-Benzothiazine-O-quinonimine	341.043	C12H12N2O5S	2.4481	Organoheterocyclic compounds	1.0945	1.7246	2.0492	1.9784	1.5879	2.0826	1.8789	1.8482	1.6446	2.0006	1.9322	1.6923	1.7276	0.7518	1.3379	0.8127	1.4908	0.4954	1.8721	1.8776	1.7958	1.7623
Atraric acid	197.08	C10H12O4	2.45687	-	2.1871	2.1739	2.1728	2.0543	2.1032	2.1161	2.0874	2.0925	2.1156	2.1245	1.9849	2.187	1.9928	2.021	2.0641	2.0682	1.9882	2.0097	1.9171	1.8765	1.8965	1.9104
N2,N2-Dimethylguanosine	334.113	C12H17N5O5	2.45687	Nucleosides, nucleotides, and analogues	1.9743	2.1559	1.8151	1.9538	2.0744	2.0447	2.0408	1.6458	1.7237	1.699	1.6777	1.8993	1.4564	1.4767	1.8006	1.8731	2.4525	1.8708	1.7306	1.6905	1.7673	1.7199
Diacetone alcohol	161.081	C6H12O2	2.45977	Organic oxygen compounds	2.1104	2.2465	2.1253	2.1838	2.0649	2.0842	2.066	1.9931	2.1382	2.0288	2.1438	2.132	2.2123	2.3919	2.2992	2.216	2.1502	2.2363	2.1658	2.1779	2.1516	2.1371
3,4-Dihydroxybenzoic acid	155.033	C7H6O4	2.47703	Benzenoids	1.7003	1.8394	1.5055	1.5991	1.8606	1.6899	1.8285	1.4547	1.4778	1.4513	1.4303	1.6553	1.2139	1.0112	1.5342	1.671	2.1298	1.6208	1.1363	1.0238	1.0485	1.1721
Lucuminic acid	491.144	C19H26O12	2.4921	Organic oxygen compounds	2.6919	2.6367	2.8889	3.0228	2.8287	2.7411	2.8545	2.7528	2.7158	2.6809	2.7321	2.8005	2.7465	2.7456	2.6589	2.8897	2.8813	2.7802	2.7945	2.8124	2.8266	2.7867
3,4,5-trihydroxy-6-[(2-phenylacetyl)oxy]oxane-2-carboxylic acid	357.085	C14H16O8	2.5036	Organic oxygen compounds	1.9938	2.039	1.7269	1.9231	2.1953	2.0108	2.1516	2.2411	2.0522	2.0378	2.0475	1.8265	1.906	2.1643	2.0242	2.0135	2.1845	2.0388	2.0783	2.047	2.096	2.014
4-ethyl-6-methoxybenzene-1,3-diol	149.061	C9H12O3	2.5141	Benzenoids	2.1996	2.1538	2.0701	2.0028	2.0072	2.0448	2.1207	2.0919	2.2064	2.1203	2.1243	1.4923	1.9736	1.9803	2.0628	2.2126	1.7274	2.0004	2.0045	2.01	1.9634	2.0606
Neuromedin B (1-3)	323.135	C12H22N4O5	2.53577	Organic acids and derivatives	3.185	3.2859	3.4028	3.5469	3.5592	3.4566	3.5129	3.6188	3.5627	3.6894	3.5344	3.5538	3.2277	3.3359	3.1968	3.4293	3.5119	3.3539	3.4443	3.4716	3.4907	3.5316
Eremopetasitenin C3	455.174	C21H30O6S	2.53577	Lipids and lipid-like molecules	3.4531	3.373	3.3471	3.4034	3.3953	3.4053	3.4839	3.5644	3.4696	3.4221	3.3935	3.5483	3.5262	3.833	3.5703	3.8303	4.057	3.6099	3.5258	3.5189	3.5396	3.566
Epicatechin-(2beta->5,4beta->6)-ent-epicatechin	577.133	C30H24O12	2.54103	Phenylpropanoids and polyketides	2.4232	2.1408	2.4444	2.3276	2.5249	2.533	2.4038	2.7632	2.4417	2.4747	2.5041	2.6757	2.4259	1.8714	2.0406	1.766	2.1235	1.4118	1.7	1.662	1.6254	1.6513
Monotropein	371.099	C16H22O11	2.54743	Lipids and lipid-like molecules	2.6958	2.6146	2.4924	2.357	2.7104	2.5954	2.5212	2.6292	2.5442	2.564	2.7257	2.6766	2.564	2.5891	2.6062	2.3844	2.9008	2.6055	2.5323	2.5355	2.5746	2.5678
(R)-S-lactoylglutathionate(1-)	360.086	C13H21N3O8S	2.55775	Organic acids and derivatives	3.8897	3.649	3.1052	3.0423	3.1781	2.4994	3.3073	3.0932	2.7435	2.4284	3.411	2.3747	3.0946	3.3299	3.1003	3.0836	3.2009	3.2744	3.3737	3.3267	3.3793	3.3626
6-(5-ethenyl-2,3-dihydroxyphenoxy)-3,4,5-trihydroxyoxane-2-carboxylic acid	373.078	C14H16O9	2.57908	Organic oxygen compounds	2.665	2.4522	2.7807	2.6849	2.8527	2.4845	2.6792	2.3676	2.2819	2.2458	2.4848	2.9022	1.2766	2.0162	1.9549	2.568	2.9844	2.1507	2.5258	2.5036	2.5184	2.4923
4-ethenyl-6-methoxybenzene-1,3-diol	211.061	C9H10O3	2.57908	Benzenoids	3.3759	3.384	3.3972	3.3346	3.3242	3.3755	3.432	3.4473	3.4479	3.5395	3.3607	3.4793	3.2801	3.2653	3.4567	3.3771	3.2113	3.4317	3.3404	3.3367	3.3448	3.3546
(E)-8-Hydroxy-2-octene-4,6-diynoic acid	195.029	C8H6O3	2.57908	Lipids and lipid-like molecules	3.2134	3.5175	3.1432	3.0594	2.9745	3.3134	3.1409	3.0129	3.1904	3.3094	3.2218	3.1732	3.309	3.2423	3.4983	3.2594	3.1305	3.4513	3.2727	3.2771	3.227	3.2363
Pantothenic Acid	220.117	C9H17NO5	2.5844	Organooxygen compounds	2.6426	2.7532	2.7683	2.8066	2.7438	2.8669	2.7436	2.737	2.6195	2.7678	2.7267	2.9012	2.8873	2.6674	2.7679	2.5642	2.7085	2.7353	2.514	2.4644	2.5044	2.4939
P-CHLOROPHENYLALANINE	198.033	C9H10ClNO2	2.59042	Phenylpropanoids and polyketides	4.2231	4.2474	4.2837	4.1912	4.2123	4.2859	4.3276	4.3079	4.3327	4.4118	4.298	4.3301	4.2193	4.1214	4.1891	4.2763	3.9933	4.2713	4.1978	4.2022	4.2133	4.2165
L-Oxalylalbizziine	200.03	C6H9N3O6	2.59042	Organic acids and derivatives	3.6845	3.6981	3.7383	3.647	3.6607	3.736	3.7804	3.7809	3.7818	3.8748	3.7576	3.7892	3.6707	3.5711	3.6586	3.734	3.4651	3.7269	3.657	3.6562	3.6804	3.6571
3,4,5-trihydroxy-6-(3-hydroxybenzoyloxy)oxane-2-carboxylic acid	313.057	C13H14O9	2.60075	Organic oxygen compounds	1.2038	1.6375	1.9102	2.5152	2.8744	2.184	2.4529	2.454	2.1924	0.5821	2.2085	2.2241	2.1562	2.4873	1.9908	2.4347	2.8727	2.3312	2.258	2.1281	2.1462	2.1426
Cadabicine methyl ether	486.18	C26H31N3O4	2.61142	Organic oxygen compounds	2.4576	2.4679	2.5502	2.6913	2.5567	2.3837	2.3223	2.2696	2.1793	1.8681	2.277	1.4358	2.714	2.882	2.8709	3.1679	3.108	3.0661	2.7226	2.6749	2.7458	2.6492
Demethyloleuropein	525.163	C24H30O13	2.61142	Lipids and lipid-like molecules	4.1194	4.1274	4.2168	4.1993	4.2383	4.1704	4.2367	4.2477	4.1978	4.0542	4.1587	4.1851	3.8954	3.9655	3.87	3.9098	3.9724	3.9042	4.089	4.1019	4.0964	4.0863
Apigenin 7-[rhamnosyl-(1->2)-galacturonide]	613.115	C27H28O15	2.62158	Phenylpropanoids and polyketides	2.4106	2.5545	2.544	2.5711	2.9992	3.0705	3.0263	3.3154	3.0742	3.3586	3.2434	3.0728	3.1179	2.0702	2.7289	1.9376	2.5732	1.9109	2.9328	2.9055	2.9611	2.8787
Glucosylisomaltol	289.09	C12H16O8	2.62758	Organic oxygen compounds	2.1765	2.0614	2.1624	2.1257	2.3815	2.1558	2.1207	2.0507	2.0319	1.905	2.0733	2.4571	2.5217	2.5656	2.3175	2.43	2.6848	2.559	2.2556	2.2063	2.2771	2.3122
Methylsyringin	431.155	C18H26O9	2.64258	Organic oxygen compounds	2.6245	2.3602	2.4897	2.1733	2.3313	2.5593	2.7174	2.9603	2.7637	1.82	2.7813	2.0886	2.4673	2.2114	2.2256	2.091	1.9522	2.3609	2.5285	2.5602	2.4375	2.45
4-Hydroxy-5-(3',4'-dihydroxyphenyl)-valeric acid-O-methyl-O-glucuronide	433.134	C18H26O12	2.65375	Organic oxygen compounds	2.6538	2.5235	2.55	2.8161	2.8514	2.6527	2.6874	2.4305	2.5226	2.2991	2.6518	2.6145	2.5924	2.6825	2.5542	2.8852	2.5442	2.7365	2.8087	2.7506	2.8306	2.8173
2-Ethylsuberic acid	247.118	C10H18O4	2.66425	Lipids and lipid-like molecules	1.5226	1.5933	1.2037	1.5245	1.2671	1.203	1.2376	0.6844	1.4463	1.1454	1.4401	1.4638	1.5843	1.8427	1.8501	1.8245	1.2232	1.8332	1.3658	1.5345	1.3878	1.3077
Methyl-4-hydroxybenzoate	151.04	C8H8O3	2.66425	-	2.4122	2.2309	2.4594	2.2841	2.0612	2.2235	2.123	2.3963	1.8631	0.8923	2.1359	0.9822	2.2645	2.3788	2.5306	2.5049	2.0324	2.4584	2.2387	2.2041	2.3517	2.3808
Isosalicin	285.098	C13H18O7	2.67508	Organooxygen compounds	2.5412	2.2016	2.4544	2.46	2.4524	2.3304	2.6541	2.2759	2.5289	1.8414	2.6648	1.4975	1.9082	2.3779	2.0524	2.5453	2.9102	2.5452	2.4843	2.4421	2.4951	2.4526
Casuarine 6-alpha-D-glucoside	350.144	C14H25NO10	2.67953	Organooxygen compounds	2.6859	2.6733	2.7346	2.6485	2.7874	2.772	2.6849	2.7326	2.6885	2.7316	2.6819	2.7034	2.4164	2.5533	2.4604	2.3653	2.5325	2.4548	2.3839	2.3746	2.397	2.3675
()-Catechin	289.072	C15H14O6	2.68525	-	4.4499	4.3948	4.6307	4.4742	4.6185	4.6493	4.7597	4.97	4.799	4.9895	4.8457	4.8216	4.7506	4.2386	4.4083	4.1689	4.2716	4.0661	4.6744	4.644	4.7024	4.6757
Cinnamtannin III	864.195	C90H74O36	2.70195	Phenylpropanoids and polyketides	3.0788	2.8914	2.9857	2.8091	3.3198	3.2902	3.2774	3.5438	3.237	3.3608	3.4335	3.0704	3.3992	2.6161	2.9656	2.3326	2.5912	1.7682	3.1459	3.1271	3.1829	3.1301
Moringyne	357.119	C15H20O7	2.72292	Organic oxygen compounds	3.7723	3.7504	3.6764	3.8538	3.7916	3.6914	3.5635	3.5744	3.585	3.6181	3.8127	3.7102	3.9275	3.8278	3.8144	3.8251	3.937	3.8136	3.8181	3.8333	3.8444	3.8436
Cis-beta-D-Glucosyl-2-hydroxycinnamate	325.093	C15H18O8	2.73358	Organic oxygen compounds	4.0347	3.9291	3.9153	3.9064	4.0915	4.1271	4.1375	4.2155	4.1599	4.0473	4.2877	4.1689	3.761	3.9715	3.9125	3.707	3.9489	3.7274	4.0752	4.0797	4.0994	4.1035
Cinnamtannin A2	576.13	C60H50O24	2.73358	Phenylpropanoids and polyketides	2.4492	2.8526	2.5481	2.4995	3.0996	3.1931	2.9705	3.4461	3.0886	3.3448	3.2737	3.0142	3.2496	2.4588	2.8758	1.9819	2.5138	1.9863	2.9987	2.9959	3.0023	3.0437
4-Hydroxyproline	166.026	C5H9NO3	2.74375	Organic acids and derivatives	1.9718	2.1316	2.3616	2.1968	1.9879	2.1707	2.3074	2.0551	2.2033	2.3384	2.4445	2.4359	2.3706	2.1963	2.3758	2.4249	2.0719	2.2855	2.2985	2.0605	2.319	2.2229
1H-Indol-3-ylacetyl-myo-inositol	382.115	C16H19NO7	2.74375	Organoheterocyclic compounds	1.9223	2.141	2.056	2.1229	2.5022	2.1464	1.9811	1.9953	2.3573	2.3128	1.9451	2.2254	1.9766	2.2395	2.1165	2.321	1.1421	2.2301	2.0655	2.0823	1.9817	2.1835
Phenylglucuronide	251.056	C12H14O7	2.74375	Organic oxygen compounds	2.4316	2.2617	2.305	2.3582	2.4188	2.4425	2.5273	2.5349	2.3806	2.382	2.3332	2.4599	2.297	2.2769	2.4273	2.3878	2.1644	2.3931	2.403	2.3651	2.3746	2.4047
3-(2,3-Dihydroxyphenyl)propanoate	183.064	C9H10O4	2.76952	-	2.5758	2.5567	2.438	2.4075	2.3409	2.5194	2.4382	2.4933	2.4169	2.3896	2.375	2.4547	2.5306	2.5251	2.6385	2.4952	2.5571	2.5282	2.4447	2.3725	2.3919	2.4107
8-Hydroxy-5,6-octadienoic acid	201.076	C8H12O3	2.77558	Organic acids and derivatives	2.4483	2.6454	2.3661	2.4666	2.3568	2.3956	2.4427	2.1454	2.3799	2.2944	2.4144	2.5007	2.5167	2.6202	2.6989	2.5954	2.3834	2.597	2.4479	2.4542	2.4356	2.4955
(-)-trans-3,4-Dihydro-4,8-dihydroxy-3-methyl-1H-2-benzopyran-1-one	239.056	C10H10O4	2.77558	Organoheterocyclic compounds	2.1539	1.8789	1.8892	1.9883	1.9787	2.0841	2.1928	2.2528	1.9583	1.944	2.019	2.1776	1.7877	1.8363	2.0992	2.0142	1.1433	2.0508	2.0242	1.9431	2.0396	2.0619
3-(6,7-dimethoxy-2H-1,3-benzodioxol-5-yl)oxirane-2-carboxylic acid	249.04	C12H12O7	2.78592	Organoheterocyclic compounds	1.6913	0.9846	1.2902	1.5886	1.8829	1.7994	1.7537	1.806	1.5995	1.6511	1.6839	1.5093	1.4233	1.0314	1.6923	1.6769	0.9511	1.5887	1.6327	1.5328	1.5028	1.5875
2'-Hydroxyacetophenone	135.045	C8H8O2	2.78592	Benzenoids	2.0067	1.8925	1.9426	1.6548	1.7139	1.9113	2.0703	2.1412	2.0009	2.0054	2.1256	2.1076	1.8546	1.8371	1.9712	1.8428	1.366	1.9589	1.9642	1.9186	1.9578	1.9447
3-Hydroxy-1-(4-hydroxyphenyl)-1-propanone	165.055	C9H10O3	2.78592	Organic oxygen compounds	2.6145	2.5317	2.5607	2.375	2.4084	2.5724	2.622	2.7468	2.5525	2.6251	2.7048	2.6675	2.5258	2.498	2.5478	2.4948	2.3502	2.557	2.5052	2.5108	2.5224	2.5152
3-(1,1-Dimethylallyl)scopoletin 7-glucoside	467.156	C21H26O9	2.80742	Phenylpropanoids and polyketides	3.5441	3.5393	3.4595	3.6203	3.6915	3.5452	3.6625	3.5639	3.6061	3.6042	3.4537	3.6983	3.3942	3.5734	3.4638	3.6082	3.6456	3.5311	3.5537	3.5332	3.5444	3.5449
4-Acetoxyphenol	151.04	C8H8O3	2.80742	-	2.2163	2.3394	2.0977	2.1728	2.1884	2.1778	2.2532	2.3444	2.4576	2.3132	2.2078	2.2756	2.1581	1.9161	2.1574	2.0754	1.3935	2.059	2.153	2.108	2.2324	2.1493
4-Hydroxypheoxyacetate	169.048	C8H8O4	2.81603	-	2.294	2.3561	2.3551	2.6049	2.439	2.3631	2.2412	2.14	2.2442	2.0511	2.2366	2.2994	2.083	2.0798	2.0957	2.1299	2.3213	2.0857	2.0744	1.9778	1.9884	2.0088
Phaseolic acid	261.134	C12H22O6	2.81873	Lipids and lipid-like molecules	1.6792	1.7137	2.0507	1.941	1.8181	1.9463	1.7899	1.4513	1.843	1.8196	1.743	1.9191	1.9677	1.9001	2.0062	1.9205	0.6562	2.1879	1.9024	1.8557	1.8445	1.8528
Azelaic acid	233.103	C9H16O4	2.82908	Lipids and lipid-like molecules	2.8964	2.8925	2.9147	2.9629	2.8424	2.8872	2.8975	2.6692	2.8219	2.7188	2.848	2.8933	2.9056	2.9554	3.0223	2.8736	2.8451	3.0319	2.884	2.8916	2.907	2.9095
Diethyl succinate	195.066	C8H14O4	2.8409	Lipids and lipid-like molecules	2.9316	2.9016	2.8865	2.866	2.8834	2.9133	2.9803	2.9509	2.9153	2.9915	2.9012	3.05	2.8064	2.8447	3.0109	2.9565	2.8026	2.9231	2.8999	2.9094	2.9071	2.9138
Erinapyrone C	167.035	C8H10O5	2.8409	Organoheterocyclic compounds	2.3119	2.2412	2.3037	2.178	2.0949	2.3477	2.3247	2.4095	2.2628	2.2875	2.1948	2.4643	2.1892	2.226	2.3499	2.2056	1.9809	2.2778	2.2318	2.1838	2.3572	2.4059
Epsilon-caprolactam	150.032	C6H11NO	2.85123	Organoheterocyclic compounds	1.2176	1.3015	1.5517	1.0661	0.8224	1.5514	1.4932	1.3588	1.6613	1.78	1.7606	1.5493	1.4708	0.8245	1.6741	1.7234	0.7951	1.4294	1.3603	1.3393	1.3204	1.3972
Mytilin B	345.133	C14H22N2O8	2.86273	Organic acids and derivatives	2.2868	2.3978	2.1834	2.2711	1.6292	2.2567	2.0712	2.2219	2.1764	2.1592	2.1265	2.0528	2.3447	2.1575	2.3327	2.2124	2.0112	2.4468	2.2809	2.2662	2.2999	2.2277
2-n-Propyl-4-oxopentanoic acid	203.092	C8H14O3	2.87307	Organic acids and derivatives	2.8441	2.9635	2.8344	2.8672	2.8595	2.8206	2.8493	2.6191	2.8374	2.6676	2.8163	2.8865	2.906	2.9982	2.9808	2.8904	2.8547	2.9279	2.8532	2.8475	2.8174	2.8227
Gentisic acid	153.019	C7H6O4	2.87307	Benzenoids	2.0698	2.5993	1.898	2.0952	2.4041	2.1804	2.2157	2.0202	1.9727	1.8589	2.0676	2.3117	1.6959	2.0462	1.5987	2.1093	2.4511	2.1011	2.096	2.1121	2.1678	2.2272
6-(4-ethyl-3-hydroxyphenoxy)-3,4,5-trihydroxyoxane-2-carboxylic acid	295.082	C14H18O8	2.88457	Organic oxygen compounds	2.6827	2.5218	2.4878	2.5593	2.6416	2.6608	2.7507	2.7492	2.7156	2.7616	2.5953	2.7776	2.4821	2.4487	2.6849	2.6227	2.3716	2.6422	2.6252	2.6555	2.6424	2.626
Salicylic acid	137.025	C7H6O3	2.89473	Benzenoids	4.0249	3.9766	4.036	3.9543	3.9889	3.9362	4.012	4.053	4.0812	4.0245	3.9276	4.1122	4.1502	4.1235	4.1526	4.1664	4.0481	4.1635	4.0286	4.0191	4.0563	4.0572
Benzoquinoneacetic acid	211.024	C8H6O4	2.90573	Organic oxygen compounds	2.3636	2.3225	2.1758	2.4185	2.2936	2.2548	2.4211	2.4077	2.0286	2.17	2.0874	2.7084	1.3886	2.3395	2.1445	2.4783	2.8471	2.0448	2.4895	2.3699	2.277	2.483
Osmundalactone	109.029	C6H8O3	2.90573	Organoheterocyclic compounds	2.2966	2.3288	2.0706	2.2	2.3134	2.6974	2.3441	2.3626	2.284	1.7172	2.8849	2.3073	1.5976	2.5229	0.5861	2.3679	2.0028	1.5492	2.1602	2.3138	2.3825	2.394
Pimelic acid	159.066	C7H12O4	2.92707	Lipids and lipid-like molecules	2.8375	2.7621	2.7319	2.7624	2.7692	2.6877	2.8389	2.5771	2.5919	2.5732	2.6475	2.7161	2.7491	2.7493	2.9019	2.718	2.5413	2.772	2.7284	2.7377	2.7718	2.7673
Liqcoumarin	217.05	C12H10O4	2.93723	Phenylpropanoids and polyketides	2.0667	1.8188	1.8812	1.9291	0.6956	1.9887	1.9567	2.2133	2.0256	1.2181	1.59	1.8305	0.0392	0.0424	1.2192	0.0394	0.0392	1.4625	1.6843	1.7623	1.5537	1.7812
4-Hydroxyphenylacetaldehyde	135.045	C8H8O2	2.9589	Benzenoids	2.3123	2.2063	1.8469	1.6598	2.1594	2.246	1.8635	2.0118	1.8686	1.6766	2.1313	2.0738	1.8939	2.1014	1.8251	1.6128	2.2192	1.8492	1.9525	1.9773	2.1201	2.0916
(S)-5-Amino-3-oxohexanoate	182.022	C6H11NO3	2.97057	Organic acids and derivatives	1.6537	1.9108	1.4738	1.4798	1.3914	1.5699	1.6452	1.6467	1.6454	1.6391	1.4924	1.8518	1.0953	1.4399	1.751	1.7256	1.4065	1.6644	1.5669	1.5075	1.6051	1.6034
3-(4-Hydroxy-2-methoxyphenyl)-2-propenal	533.186	C10H10O3	2.97057	Benzenoids	2.3444	2.0948	2.1116	2.1348	2.2513	2.3202	2.2596	2.3156	2.0734	1.9807	2.1737	2.3333	2.6955	2.7713	2.6041	2.8207	2.8246	2.7473	2.5055	2.531	2.4857	2.5109
1,4-Benzodioxin-2(3H)-one	195.029	C8H6O3	2.97057	Organoheterocyclic compounds	2.6842	2.6738	2.5022	2.6413	2.6154	2.7139	2.7156	2.8617	2.5994	2.6152	2.611	2.7071	2.4214	2.5794	2.6374	2.6759	2.2824	2.5886	2.669	2.6248	2.6362	2.656
5-Methoxysalicylic acid	167.035	C8H8O4	2.9809	Benzenoids	2.5654	2.5335	2.4737	2.4538	2.4677	2.5036	2.6423	2.5978	2.4732	2.5872	2.4048	2.8005	2.3988	2.4718	2.6745	2.5983	2.6723	2.545	2.5713	2.5671	2.5944	2.6018
Cinnamoside	563.234	C24H38O12	2.9809	Lipids and lipid-like molecules	0.6846	0.8176	0.1819	1.6976	1.0051	1.1237	0.4935	0.2366	0.8823	0.9062	0.0437	1.359	2.7096	3.117	2.3881	2.8967	2.6761	2.6656	2.2319	2.2589	2.3439	2.3555
Asperxanthone	331.084	C16H14O5	2.9924	Organoheterocyclic compounds	1.9599	1.8476	1.6937	1.7765	1.9657	2.1535	1.9181	2.1492	1.6801	1.8665	2.0464	1.8405	1.4817	1.5136	1.6387	1.6403	1.0154	1.7261	1.8468	1.8642	1.7565	1.8538
Rothindin	425.09	C22H20O10	2.9924	Phenylpropanoids and polyketides	1.61	1.2372	1.7686	0.9428	1.6501	1.6706	1.8211	2.2596	1.7717	1.9975	1.9738	1.9632	1.6357	0.2694	1.5997	1.2058	0.2158	0.1711	1.7401	1.7011	1.492	1.653
5-hydroxy saxagliptin	352.162	C18H25N3O3	2.9924	Organic acids and derivatives	2.6873	2.5287	2.6623	2.6909	2.7504	2.7365	2.9072	2.4639	2.6252	2.5825	2.7598	2.5622	2.8374	2.6549	2.953	2.6529	1.5589	3.0223	2.609	2.5893	2.6436	2.6412
Ethyl (2E)-3-(4-hydroxyphenyl)prop-2-enoate	237.077	C11H12O3	3.00273	Phenylpropanoids and polyketides	2.0761	1.8568	1.8468	1.9134	2.0672	1.9122	1.8971	2.0204	1.9918	2.0489	1.907	2.05	1.862	1.7959	1.9093	2.1363	1.1497	1.8617	1.8451	1.8989	1.9186	1.9174
Chondroitin 6'-sulfate	510.09	C16H27NO14S	3.03623	Organic oxygen compounds	0.0569	0.0004	0.0778	0.0014	0.2021	2.7983	0.2073	0.1925	0.003	0.0208	3.6935	2.0305	0.0179	0.0735	0.0004	0.1075	0.1084	0.0004	1.5187	1.443	1.56	1.4095
Prephenate	207.03	C10H10O6	3.03623	Organic acids and derivatives	1.7973	1.7567	1.7867	1.604	1.8417	1.9546	2.0211	2.0227	1.8074	1.7387	1.7971	1.7681	1.6923	1.854	1.9227	1.7644	1.5113	1.8378	1.7669	1.8907	1.8158	1.8019
5-(2-Methylpropyl)tetrahydro-2-oxo-3-furancarboxylic acid	185.082	C9H14O4	3.04657	Organoheterocyclic compounds	2.8962	3.0138	2.8422	2.9262	2.8474	2.8889	2.8246	2.7351	2.8663	2.7704	2.885	2.8786	2.9286	2.973	3.0227	2.9233	2.6985	2.9005	2.9044	2.8856	2.9002	2.9066
Gentiobiosyl 2-methyl-6-oxo-2E,4E-heptadienoate	459.15	C20H30O13	3.0584	Organic oxygen compounds	2.8739	2.7305	2.9389	2.6364	2.8448	2.7895	2.6358	2.6283	2.4161	2.5472	2.6533	2.7963	3.119	2.9541	3.0595	3.1349	2.778	3.2476	2.9273	2.9125	2.914	2.8889
Hydroxytyrosol 1-O-glucoside	297.098	C14H20O8	3.0584	Organic oxygen compounds	2.2909	1.983	1.9245	1.9474	2.1115	2.1376	2.2799	2.1169	2.0406	1.8922	1.9806	2.2671	2.0195	2.2246	2.0761	2.54	0.9035	2.159	2.1136	2.1217	2.1438	2.1223
3'-Sialyllactosamine	653.204	C23H40N2O18	3.0584	Organic oxygen compounds	3.3692	3.3155	3.2846	3.357	3.4194	3.3515	3.3956	3.4243	3.4585	3.5181	3.3317	3.4292	3.4982	3.4092	3.5151	3.6553	3.2523	3.4934	3.4415	3.4113	3.4267	3.4239
(E)-Oxyresveratrol 3'-O-b-D-glucoside	451.128	C20H22O9	3.06857	Phenylpropanoids and polyketides	1.8388	1.7175	1.7501	1.7464	2.3297	1.977	2.0099	1.8251	1.7742	1.9829	2.1538	1.868	2.1581	2.0829	1.9405	1.9033	2.2064	2.0105	1.9096	2.1084	2.0968	2.0184
2-[2,4,6-trihydroxy-3-(3-methylbut-2-en-1-yl)phenyl]acetic acid	251.092	C13H16O5	3.08005	Benzenoids	1.681	1.0397	0.9895	0.7477	1.3165	1.4719	1.0861	1.5032	1.1601	1.4541	1.5827	1.3429	1.715	1.4995	1.6497	0.9523	0.7099	1.2436	1.3506	1.3874	1.3526	1.3788
Isocoproporphyrin	689.241	C36H38N4O8	3.08005	Organoheterocyclic compounds	3.063	3.0543	3.0004	3.0473	3.06	3.058	3.0712	3.0436	3.0757	3.1194	3.0159	3.1066	3.0344	2.9721	3.0136	3.1033	2.8597	3.0487	3.0323	3.0032	3.0172	3.0125
Isoeugenitin	265.071	C12H12O4	3.09022	Organoheterocyclic compounds	2.1904	1.9808	1.9914	2.0663	2.1935	2.1682	2.2629	2.2448	2.1333	2.0212	1.999	2.1869	1.9259	1.9848	1.964	2.1762	1.4197	2.1072	2.0523	2.0795	2.0436	2.0931
Taraxinic acid glucosyl ester	405.155	C21H28O9	3.09022	Lipids and lipid-like molecules	2.9137	2.9752	2.9654	2.9773	2.8839	2.8794	2.7423	2.5936	2.8685	2.797	2.7373	2.8802	2.9194	2.8138	2.9873	2.9109	2.6219	2.9536	2.8751	2.9094	2.8903	2.9062
2-(1,3-dihydroxy-4-oxocyclohexyl)-5-hydroxy-3,6,7-trimethoxy-4H-chromen-4-one	361.094	C18H20O9	3.10172	-	2.4576	2.3109	2.2397	2.3758	2.4039	2.3608	2.4851	2.4777	2.3487	2.4414	2.3675	2.4934	2.1462	2.1926	2.4093	2.4833	2.0629	2.3538	2.3583	2.4071	2.4232	2.3512
Deoxyguanosine	288.07	C10H13N5O4	3.11205	Nucleosides, nucleotides, and analogues	1.0608	0.0034	1.1104	1.0822	0.73	0.8677	1.4232	0.6825	1.2106	1.2687	1.3885	0.6913	0.8662	0.0034	1.251	0.0031	0.0031	1.2971	0.996	1.1456	1.1033	1.2537
2-(4-ethyl-3-hydroxyphenyl)-3,4-dihydro-2H-1-benzopyran-3,5,7-triol	347.114	C17H18O5	3.12338	Phenylpropanoids and polyketides	3.1925	3.0496	3.0399	3.0095	3.1674	3.1002	3.2261	3.2041	3.2032	3.2602	3.1323	3.2745	3.2553	3.2332	3.3807	3.3483	3.0497	3.3064	3.176	3.1675	3.1828	3.1959
6-Oxopiperidine-2-carboxylic acid	178.026	C6H9NO3	3.14505	Organic acids and derivatives	1.8822	1.7302	2.2358	1.9119	2.0142	1.9706	2.1131	2.341	2.2244	2.057	2.1347	2.0817	1.87	1.8468	1.9533	1.9789	2.0408	2.165	2.0353	2.0308	1.9197	1.897
6-[4-(4-carboxybutyl)-2-methoxyphenoxy]-3,4,5-trihydroxyoxane-2-carboxylic acid	421.115	C18H24O10	3.15538	Lipids and lipid-like molecules	2.959	2.8066	2.7701	3.0155	3.0811	2.9039	2.96	3.0264	2.8563	2.9014	2.8837	3.0223	2.793	3.0387	2.8335	3.1319	3.207	2.8216	2.9407	2.9953	2.9659	2.9502
2-[3-hydroxy-4-(methoxymethyl)phenyl]-3,4-dihydro-2H-1-benzopyran-3,5,7-triol	363.109	C17H18O6	3.15538	Phenylpropanoids and polyketides	3.0594	2.9099	2.9303	2.8488	2.8452	2.8934	2.9829	3.0598	3.1252	3.1006	2.8608	3.045	3.1874	3.257	3.2762	3.1663	3.1999	3.3379	3.0343	3.0669	3.0706	3.0621
Chitobiose	407.135	C15H26N2O12	3.16688	Organic oxygen compounds	2.5823	2.3075	2.1678	2.0766	2.7063	2.348	2.4128	2.3142	2.4965	2.7665	2.2538	2.5412	2.3185	2.0152	2.2578	2.3666	1.7002	2.5252	2.2158	2.2285	2.334	2.3096
3-(2-hydroxyphenyl)propanal	149.061	C9H10O2	3.16688	Benzenoids	2.1036	1.9938	1.8112	1.7027	1.594	1.9342	1.487	1.4747	1.7259	1.9124	2.0667	1.868	2.1951	2.1001	1.6498	2.1697	1.5596	2.0566	1.8532	1.865	1.8195	1.8837
Alpha-Carboxy-delta-nonalactone	245.103	C10H16O4	3.16688	Organoheterocyclic compounds	2.7459	2.7793	2.565	2.6466	2.6093	2.6661	2.6013	2.4745	2.5519	2.4813	2.6498	2.6936	2.6953	2.6799	2.7465	2.6967	2.4831	2.7403	2.663	2.6526	2.6164	2.6557
Oleacein	365.124	C17H20O6	3.16688	Benzenoids	2.8991	2.8874	2.8084	2.7875	2.9538	2.8885	2.9362	2.9793	3.058	3.0968	2.9772	3.067	2.7539	2.7982	2.7539	2.8533	2.5721	2.8424	2.8511	2.8867	2.8762	2.8793
Homocarnosine	304.138	C10H16N4O3	3.173	Organic acids and derivatives	2.8747	2.6566	2.8506	2.6483	2.5995	2.7568	2.4549	2.643	2.4418	2.4863	2.6894	2.561	2.4677	2.2657	2.3799	1.9681	2.3112	2.1543	2.3093	2.2704	2.2564	2.1705
3,4-DHPEA-EA	359.116	C19H22O8	3.18822	Lipids and lipid-like molecules	2.4595	2.097	2.0646	1.9459	2.1727	2.1279	2.1942	2.3236	2.1492	2.3965	2.162	2.3936	2.1708	2.113	2.2121	2.1996	1.9496	2.4565	2.1684	2.1604	2.1771	2.2514
Alectrol	327.123	C19H22O6	3.19838	Organoheterocyclic compounds	2.8454	2.5656	2.5072	2.4224	2.6009	2.5818	2.3892	2.2849	2.5542	2.5589	2.5893	2.5897	2.6107	2.4445	2.6466	2.501	2.4045	2.8405	2.5473	2.5744	2.572	2.5387
4-Hydroxybenzaldehyde	121.03	C7H6O2	3.19838	Organic oxygen compounds	3.7766	3.71	3.6542	3.4895	3.6166	3.7333	3.6105	3.5562	3.4538	3.4288	3.6601	3.5655	3.8194	3.7519	3.9375	3.8906	3.6127	3.7323	3.6731	3.6437	3.6715	3.6719
Moracin P	371.113	C19H18O5	3.20938	Phenylpropanoids and polyketides	2.0475	1.9801	1.8503	1.9196	2.0177	1.9639	1.9728	1.9991	2.0888	2.2707	1.8931	2.2091	1.8714	1.8236	2.0329	2.0695	1.9867	2.2252	1.9693	1.9418	1.9693	1.9825
Saxitoxin	298.124	C10H17N7O4	3.20938	Phenylpropanoids and polyketides	1.4152	1.3156	0.6918	1.1512	0.7077	0.7657	0.7629	0.9048	0.8439	1.1775	0.9503	0.7533	1.3631	1.2664	1.2105	1.0213	0.6819	1.6624	1.1438	1.0463	1.2812	1.1258
Tetrahydro-2,5-dimethyl-2H-pyranmethanol	189.113	C8H16O2	3.21938	Organoheterocyclic compounds	2.1362	1.6456	2.2015	1.8703	1.3893	2.0315	1.9199	2.0152	1.7637	1.8693	1.8723	1.9139	1.7333	1.8829	1.5526	1.2568	1.5945	2.2376	1.722	1.584	1.839	1.7497
Mytilin A	995.359	C13H20N2O8	3.23022	Organic acids and derivatives	3.3153	3.2823	3.3286	3.3783	3.1011	3.2489	3.3837	3.2561	3.4173	3.4235	3.2981	3.3893	3.2892	3.1868	3.2335	3.3703	3.0301	3.3362	3.2696	3.2358	3.2657	3.2604
Austdiol	235.061	C12H12O5	3.23022	Organoheterocyclic compounds	1.3566	2.192	1.9101	1.8032	2.1944	2.5767	2.0353	2.545	2.0649	2.4431	2.0385	2.1056	2.105	2.0779	2.505	1.9726	2.0626	2.224	2.0855	2.0796	2.1924	2.2165
1-Octen-3-yl glucoside	335.171	C14H26O6	3.24252	Lipids and lipid-like molecules	1.9729	2.2583	1.7568	1.5054	0.6081	1.8413	1.388	1.0257	1.9989	2.0711	1.7594	1.9612	1.942	2.0497	2.1606	1.626	0.95	2.2537	1.7915	1.7489	1.9809	1.7969
Hydroxynefazodone	522.164	C25H32ClN5O3	3.24252	Organoheterocyclic compounds	2.8603	2.6273	2.359	1.9304	2.4603	2.6046	2.5117	2.9425	2.9905	3.1485	2.6115	2.7794	2.6334	2.377	2.4901	2.3998	2.5636	2.6073	2.5663	2.5475	2.6326	2.7258
Trans-p-Menth-2-ene-1,4-diol	215.129	C10H18O2	3.25238	Lipids and lipid-like molecules	2.4079	2.6284	2.0207	2.2448	1.9257	2.1846	2.0625	1.0174	1.9586	2.0707	1.8408	2.1738	2.0969	2.1449	2.181	2.0338	1.2499	2.2289	2.0107	1.9238	2.1612	2.2049
(+)-7-epi-Syringaresinol 4'-glucoside	625.216	C28H36O13	3.26322	Lignans, neolignans and related compounds	3.8294	3.87	3.7671	3.8945	3.8225	3.8575	3.9003	3.6486	3.873	3.9881	3.6639	3.8655	3.2657	3.3564	3.3477	3.5561	3.6769	3.336	3.722	3.6888	3.7384	3.7997
Epicatechin-(4beta->8)-gallocatechin	575.121	C30H26O13	3.26322	Phenylpropanoids and polyketides	2.2304	1.5489	2.1507	1.8154	1.8291	1.7125	2.4554	2.1875	2.2769	2.5956	2.3392	2.4788	1.7648	0.9153	0.9024	0.8864	0.8848	0.8941	2.0158	2.0049	1.9658	2.0796
Bikoeniquinone A	465.143	C27H20N2O3	3.26322	Organoheterocyclic compounds	2.3622	2.2459	2.3126	2.3013	2.3474	2.3906	2.4796	2.303	2.5692	2.6865	2.2452	2.5826	2.3518	2.1819	2.4516	2.6561	2.2033	2.4761	2.3103	2.2718	2.3591	2.3484
L-3-Aminodihydro-2(3H)-furanone	136.016	C4H7NO2	3.29422	Organic acids and derivatives	2.2488	2.7579	2.3107	1.9749	2.5643	2.5286	2.4606	1.0649	0.8893	1.4853	2.7636	0.7521	2.5422	2.5519	2.9052	2.6159	2.5003	2.4021	2.5406	2.4411	2.3912	2.3856
Vanillin	151.04	C8H8O3	3.29422	Benzenoids	2.3086	2.6642	2.2494	2.0862	2.437	2.6012	2.3329	1.8468	1.7006	1.8095	2.499	1.7911	2.6469	2.4889	2.9357	2.6428	2.4441	2.4533	2.4735	2.4845	2.4067	2.4442
Estrone glucuronide	467.168	C24H30O8	3.29422	Lipids and lipid-like molecules	3.0845	3.0874	3.1538	3.294	3.1091	3.1496	3.1295	3.0834	3.1038	3.0983	3.0624	3.1886	2.9662	2.9143	2.9133	3.027	3.0881	2.9512	3.0783	3.0531	3.0945	3.0752
(2E)-3-(2,4-dihydroxyphenyl)prop-2-enoic acid	225.04	C9H8O4	3.31488	Phenylpropanoids and polyketides	1.9653	1.913	1.7538	1.7625	2.1328	1.8121	1.9833	2.1612	1.9368	2.1372	1.8736	1.9948	1.9064	1.823	2.1797	2.1566	1.5652	1.9343	1.9359	1.9261	1.8676	1.9566
1,7-Dimethylguanosine	334.113	C12H17N5O5	3.35315	Nucleosides, nucleotides, and analogues	1.7174	1.9251	1.4176	1.9461	1.9195	1.7757	1.824	1.4348	1.6689	1.1529	1.6338	1.7132	1.544	1.8523	1.5421	1.8704	2.3296	1.5744	1.1767	1.2951	1.2671	1.2239
N-Acetyl-D-phenylalanine	206.082	C11H13NO3	3.3567	-	1.9875	1.9967	1.5284	1.9382	1.8971	2.0823	2.1464	2.0851	1.8605	2.0257	1.9875	1.889	1.4841	1.7269	1.7541	1.7077	1.8801	2.0181	1.9738	1.9136	1.7582	1.9269
2-Hydroxydecanedioic acid	217.108	C10H18O5	3.36753	Organic acids and derivatives	2.6131	2.6637	2.4184	2.6272	2.5261	2.4755	2.5129	2.3962	2.3322	2.4622	2.4214	2.5684	2.4702	2.5663	2.586	2.6006	2.486	2.681	2.5214	2.4999	2.5267	2.5394
Propyl 2-furoate	135.045	C8H10O3	3.37753	Organoheterocyclic compounds	2.1408	1.9847	1.8356	1.718	1.7611	1.872	1.8475	1.843	1.6898	1.6199	1.7021	1.8674	2.4049	2.1672	2.3879	2.2517	1.9429	2.0984	1.9891	1.9557	1.8137	1.9605
1-Nitro-5-hydroxy-6-glutathionyl-5,6-dihydronaphthalene	477.106	C20H24N4O9S	3.38853	Organic acids and derivatives	2.1043	1.9022	1.8899	1.6213	2.2679	2.085	2.1784	2.7357	1.8182	1.486	2.1063	1.828	1.5947	2.798	1.7489	1.7177	4.0932	1.3905	2.5294	2.6304	2.5594	2.4776
6'-Hydroxyenterolactone	359.114	C18H18O5	3.3987	Lignans, neolignans and related compounds	3.1973	3.0779	2.9631	2.8537	3.0373	3.214	3.2175	3.3677	3.181	3.3222	3.098	3.16	3.2671	3.1276	3.2012	2.9772	2.9669	3.2463	3.1004	3.0956	3.1301	3.1321
3-hydroxy-6-methyl-2H-chromen-2-one	221.045	C10H8O3	3.3987	Phenylpropanoids and polyketides	3.3452	3.2451	3.1871	3.2744	3.3399	3.3614	3.3721	3.4397	3.3429	3.3417	3.2843	3.3529	3.0557	3.1909	3.195	3.2399	3.1033	3.2095	3.2546	3.3045	3.2761	3.2958
Quercetin 3-O-glucoside	463.09	C21H20O12	3.4097	Phenylpropanoids and polyketides	2.265	1.457	1.754	2.145	2.2769	2.3157	2.3873	2.7888	2.1971	2.3669	2.645	2.3664	1.8807	1.5701	1.5273	1.4364	2.8205	1.236	2.1611	2.0929	2.1306	2.1499
Olivin	361.093	C17H16O6	3.4197	Phenylpropanoids and polyketides	2.464	2.0453	2.3413	2.057	2.6322	2.1924	2.6556	2.4506	2.0295	2.1992	2.1315	2.443	1.9309	2.064	2.1954	2.6534	1.9104	1.9996	2.1777	2.2895	2.2269	2.2341
Citbrasine	364.139	C17H17NO6	3.42448	Organoheterocyclic compounds	1.9593	2.1599	2.0821	2.2558	2.0147	2.4076	2.1777	2.4298	2.0931	2.2012	2.2102	2.0099	1.9939	1.8725	1.9119	1.6799	2.2489	1.8539	1.3298	1.0795	1.2285	1.2724
Ptelatoside B	473.167	C20H28O10	3.43053	Organic oxygen compounds	3.598	3.8171	3.4698	3.3199	3.4398	3.4637	3.2036	3.3056	3.0721	3.3422	3.3349	3.1654	3.3123	3.1579	3.2855	3.1081	2.8307	3.1639	3.165	3.1757	3.1873	3.1865
Threoninyl-Methionine	295.097	C9H18N2O4S	3.4522	Organic acids and derivatives	2.4843	2.4171	2.2226	2.0487	2.1571	2.4658	2.3679	2.5102	2.3074	2.3408	2.2698	2.292	2.6013	2.5521	2.5451	2.4544	2.1995	2.622	2.372	2.494	2.41	2.4225
Isopentyl beta-D-glucoside	231.126	C11H22O6	3.4522	Lipids and lipid-like molecules	2.168	2.3608	1.979	2.0732	2.2215	2.2957	2.0554	1.9209	1.7284	1.5936	2.1745	2.0552	2.0435	2.2348	2.1503	2.0478	1.5895	2.034	2.0989	2.0556	1.9928	2.1782
L-alpha-glutamyl-L-hydroxyproline	283.088	C10H16N2O6	3.45548	Organic acids and derivatives	1.5201	1.634	1.3976	1.9345	1.4313	1.698	1.4641	1.3606	1.3146	1.6048	1.4656	1.316	2.1433	1.9167	1.8061	1.8174	2.177	1.8638	1.4242	1.3835	1.3305	1.4053
Simmondsin	408.184	C16H25NO9	3.45548	Organic oxygen compounds	2.6855	2.5007	2.4567	2.7046	2.7597	2.6738	2.5004	2.6311	2.4506	2.2695	2.4884	2.5164	2.4643	2.7307	2.3999	2.5941	2.8781	2.4738	2.3655	2.3668	2.3632	2.3367
1,N2-propanodeoxyguanosine	352.125	C13H17N5O4	3.48337	Nucleosides, nucleotides, and analogues	1.6857	1.7666	1.2828	1.7583	0.692	1.3524	1.3502	0.6583	0.9889	0.6152	1.1374	1.5407	1.5289	1.173	1.4558	1.6353	0.6664	1.1116	1.4224	1.3955	1.3746	1.5864
2-Methyl-3-hydroxyvaleric acid	115.074	C6H12O3	3.48698	Lipids and lipid-like molecules	1.8309	2.0551	1.72	1.9398	1.7363	1.8357	1.8122	1.5141	1.6788	1.5	1.7036	1.7742	1.7926	1.833	1.8742	1.8186	1.8156	1.8132	1.776	1.7266	1.6671	1.6568
Toringin	461.111	C21H20O9	3.4942	Phenylpropanoids and polyketides	0.9614	1.6306	0.8559	2.6322	2.2001	1.8972	1.3635	1.7667	0.7002	0.3107	1.9204	1.8447	2.0324	2.4922	1.5312	2.2275	3.2607	0.9388	2.0679	2.1642	2.1402	2.0848
CMPF	239.092	C12H16O5	3.4942	Lipids and lipid-like molecules	1.659	1.5893	1.603	1.5474	1.3602	1.4812	1.7348	1.453	1.8358	1.5519	1.8308	1.7321	1.8776	1.7749	1.9866	1.8209	0.9443	1.9232	1.6855	1.659	1.6998	1.6782
1-(3-Methyl-2-butenoyl)-6-apiosylglucose	436.181	C16H26O11	3.50832	Lipids and lipid-like molecules	2.3802	2.4194	2.3666	2.4775	2.4512	2.5267	2.4052	2.4617	2.4318	2.3601	2.3682	2.3922	2.3493	2.4113	2.2195	2.2751	2.5108	2.3791	2.109	2.1066	2.1381	2.1668
Suberic acid	173.082	C8H14O4	3.51537	Lipids and lipid-like molecules	3.8118	3.8679	3.7527	3.8104	3.7094	3.7384	3.688	3.5668	3.6386	3.6231	3.6916	3.7035	3.7305	3.7662	3.8266	3.7586	3.5691	3.7367	3.7782	3.7333	3.7357	3.7546
2,3-Dihydroxy-1-(4-hydroxy-3-methoxyphenyl)-1-propanone	213.075	C10H12O5	3.51865	Organic oxygen compounds	3.1503	3.2048	3.1697	3.3006	3.1875	3.0711	3.0669	3.0793	3.0616	2.9499	2.9541	3.039	3.0571	3.1893	3.164	3.1024	3.3197	2.9436	3.154	3.0768	3.0939	3.0906
Wistin	524.155	C23H24O10	3.51865	Phenylpropanoids and polyketides	3.2337	2.9246	2.4511	2.4909	2.6641	2.2195	2.6857	2.2835	2.4621	2.1846	2.766	2.5748	2.4485	2.4953	2.5673	2.3615	2.8169	2.6775	2.316	2.3844	2.3563	2.4295
Pyridinoline	411.185	C18H28N4O8	3.51865	Organic acids and derivatives	1.4723	1.3661	1.4786	1.6854	1.6997	1.6547	1.5594	1.6101	1.1475	1.4914	1.3341	1.7947	1.7071	2.2707	1.474	2.0088	2.7298	2.0269	1.5911	1.7201	1.6971	1.5893
OXYQUINOLINE	146.059	C9H7NO	3.51865	-	3.456	3.3595	3.3974	3.4037	3.4072	3.3444	3.3188	3.3813	3.3788	3.3916	3.3974	3.3346	3.2455	3.3121	3.3019	3.3369	3.2986	3.3187	3.3286	3.28	3.3253	3.3666
Glutamylarginine	324.13	C11H21N5O5	3.5257	Organic acids and derivatives	2.5598	2.7112	2.5592	2.4672	2.0883	2.3449	2.3919	2.1124	2.3639	2.4879	2.4926	2.5254	2.5029	2.298	2.4426	2.3877	1.1791	2.4982	2.548	2.4019	2.4606	2.3848
S-Lactoylglutathione	362.099	C13H21N3O8S	3.52982	Organic acids and derivatives	4.5908	4.3062	3.5283	3.5918	3.7839	2.5292	4.0652	3.7527	3.9024	3.2871	4.0809	3.4619	3.855	4.097	3.8343	3.7702	4.0532	3.9832	3.9402	3.9262	3.9195	3.9395
Dehydrooreadone	279.122	C14H18O3	3.53185	Organoheterocyclic compounds	2.4098	2.1369	2.5036	2.4783	2.3968	2.5841	2.5528	2.448	2.2361	2.6332	2.6114	2.4661	1.8277	1.9424	1.5905	0.7989	0.7974	2.1682	2.4295	2.4376	2.5088	2.435
Mandelonitrile sophoroside	502.158	C20H27NO11	3.53185	Organic oxygen compounds	4.0861	4.1683	4.0829	4.2457	4.3972	4.266	4.1528	4.4302	4.2354	3.8468	4.0337	4.1114	4.1193	4.4302	4.0268	4.2919	4.5498	3.9689	4.2651	4.2445	4.2538	4.2561
2-Ethyl-2-Hydroxybutyric acid	131.071	C6H12O3	3.53765	Lipids and lipid-like molecules	2.5712	2.6639	2.5768	2.6493	2.4433	2.5153	2.505	2.3949	2.48	2.381	2.5541	2.5323	2.6138	2.6515	2.6648	2.6629	2.3828	2.5683	2.6521	2.6069	2.5788	2.6359
3-hydroxyphenylpropionylglycine	188.069	C11H13NO4	3.53965	Organic acids and derivatives	2.8701	2.8673	3.3063	3.055	3.1664	2.9435	2.7751	3.02	3.016	2.7846	3.0577	2.7619	2.6384	2.8595	2.9502	2.6869	2.7906	2.9502	2.8112	2.8863	2.8881	2.6841
L-Tryptophan	205.096	C11H12N2O2	3.53965	Organoheterocyclic compounds	2.9362	2.8241	3.1663	2.9753	3.1607	2.9859	2.7502	2.9216	2.8683	2.6461	2.9494	2.7644	2.7393	2.8943	2.621	2.6956	2.663	2.7639	2.8164	2.7862	2.8131	2.7863
Jasmolone glucoside	406.184	C17H26O7	3.55015	Organic oxygen compounds	2.3418	2.3379	1.8509	1.7755	1.4096	2.1674	1.9812	1.9485	2.1853	1.9103	1.9077	2.0571	1.7653	2.1649	2.244	1.6613	1.8805	2.2411	2.1558	2.0191	1.9392	1.8842
8-Oxodiacetoxyscirpenol	401.124	C19H24O8	3.5542	Lipids and lipid-like molecules	2.755	2.5529	2.6136	2.7084	2.8086	2.7436	2.8193	2.8393	2.8194	2.9494	2.7674	2.7208	2.5373	2.4578	2.7238	2.7917	2.3692	2.6224	2.7028	2.6651	2.7199	2.6608
Lippioside I	519.155	C25H30O13	3.5542	Lipids and lipid-like molecules	2.2143	1.7608	2.1942	1.9532	2.4238	2.0538	2.2016	2.2685	2.2083	2.3647	2.3051	2.2832	2.152	1.7793	1.9903	1.9333	2.4948	2.0624	2.2314	2.1994	2.1069	2.1383
Indole	118.064	C8H7N	3.56013	Organoheterocyclic compounds	3.5577	3.4933	3.5058	3.5745	3.5378	3.5492	3.5077	3.5276	3.4928	3.4977	3.4718	3.5568	3.4641	3.4279	3.4357	3.4598	3.3939	3.4552	3.3753	3.3924	3.4237	3.4474
4'-O-methyl-(-)-epicatechin-3'-O-beta-glucuronide	493.137	C23H26O12	3.56437	Phenylpropanoids and polyketides	2.9796	2.9353	2.6537	2.7137	3.194	2.8909	3.1161	3.1696	3.0092	2.6433	2.7953	2.843	2.6176	3.1633	2.6419	2.8722	3.5776	2.5469	3.0543	3.0242	3.0612	3.0307
N-Acetylproline	192.042	C7H11NO3	3.56437	Organic acids and derivatives	2.7112	2.679	2.9032	2.7138	2.6966	2.7516	2.8372	2.7986	2.8654	2.8985	2.7315	2.8046	2.7426	2.6633	2.8007	2.767	2.5571	2.8249	2.6674	2.7051	2.7394	2.7371
3,4-Methyleneazelaic acid	257.103	C11H16O4	3.56437	Lipids and lipid-like molecules	3.3581	3.1248	3.4498	3.3943	3.2823	3.3211	3.3948	3.0873	3.1989	3.1012	3.2905	3.2525	3.422	3.4408	3.5146	3.4528	3.3692	3.5229	3.33	3.3258	3.3512	3.3228
Sinapyl aldehyde	207.066	C11H12O4	3.56437	-	3.2592	3.2789	3.4094	3.2838	3.2723	3.2935	3.3226	3.3134	3.4107	3.4302	3.2283	3.3762	3.3435	3.2732	3.3877	3.4324	3.1986	3.4034	3.3156	3.3206	3.3251	3.3082
S-Adenosylmethionine	422.133	C15H23N6O5S+	3.56623	Nucleosides, nucleotides, and analogues	2.5802	2.5911	2.5659	2.5486	2.5571	2.6395	2.5398	2.5932	2.6226	2.6433	2.516	2.5496	2.4698	2.4227	2.5072	2.5601	2.3059	2.5576	2.5496	2.4912	2.5964	2.5085
Aesculetin	177.019	C9H6O4	3.57537	Phenylpropanoids and polyketides	1.7531	1.6573	1.9884	1.6223	1.3012	1.9599	2.0445	1.5455	1.8262	2.122	1.9274	1.8221	2.0034	1.4954	2.0583	2.0666	0.9082	2.1037	1.7522	1.9095	1.8486	1.7596
Citreoviridinol A1	465.176	C22H28O8	3.58553	Organoheterocyclic compounds	3.1603	2.8581	2.9542	3.0055	3.3563	3.081	3.0987	3.0571	3.0472	3.0824	3.0018	3.3199	2.7749	3.0822	2.8479	2.8415	2.9063	2.6867	3.0067	2.9741	3.0012	3.0198
19-Hydroxy-PGE2	413.218	C20H32O6	3.58553	Lipids and lipid-like molecules	2.013	1.7297	1.7051	1.7385	1.7245	1.7605	1.7205	1.6826	1.6717	1.6279	1.6961	1.7274	3.4667	3.5719	3.455	3.4354	3.3469	3.4473	3.1599	3.156	3.1724	3.1429
4-Nitrocatechol	154.014	C6H5NO4	3.5962	Benzenoids	2.9436	2.3021	2.1189	2.5069	2.3582	2.4306	2.8685	2.833	2.3515	2.3065	2.7337	2.975	1.9576	2.7963	2.8912	2.5561	2.5797	2.5157	2.4602	2.5249	2.6138	2.5272
S-(Formylmethyl)glutathione	332.089	C12H19N3O7S	3.5963	Organic acids and derivatives	2.9289	2.8705	1.9496	2.1605	2.6444	1.2667	2.5671	2.7093	2.489	1.2201	2.9257	1.157	1.4221	2.6923	2.7672	1.9416	3.3093	2.6081	1.1357	1.2921	1.202	1.1458
Lusitanicoside	487.183	C21H30O10	3.6062	Organic oxygen compounds	3.4899	3.4178	3.4093	3.3043	3.1438	3.4173	3.3951	3.7174	3.4349	3.5602	3.5791	3.4225	4.2792	4.1153	4.1977	4.049	3.9499	4.134	3.6776	3.6767	3.6683	3.6834
Procyanidin B2	579.149	C30H26O12	3.60665	Phenylpropanoids and polyketides	3.7067	3.9391	3.7886	3.8421	4.23	4.2303	3.9374	4.3176	4.0086	4.1684	4.2096	3.9494	3.7288	3.7099	3.8588	3.3113	3.936	3.3337	2.971	2.9556	2.931	2.9403
Sinapyl alcohol	193.085	C11H14O4	3.62697	Benzenoids	2.3616	2.5738	2.5765	2.7767	2.4939	2.5961	2.256	1.8432	2.3671	2.2588	2.0242	2.5195	2.3779	2.4417	2.6051	2.7231	2.7012	2.3825	2.7481	2.7108	2.6641	2.7081
(2S)-2-Butanol O-[b-D-Apiofuranosyl-(1->6)-b-D-glucopyranoside]	403.14	C15H28O10	3.6272	Organic oxygen compounds	3.278	3.1044	3.3466	3.1596	3.2876	3.3231	3.1641	3.0616	3.1692	3.2768	3.1718	3.1761	3.0945	3.0446	3.1878	3.1046	3.0022	3.1595	3.1298	3.135	3.1622	3.1487
Neoconvallatoxoloside	751.3	C35H54O15	3.63802	Lipids and lipid-like molecules	4.1551	4.1944	4.2425	4.1895	4.0707	4.1292	4.1498	4.2141	4.2372	4.288	4.1652	4.1835	4.3562	4.218	4.3229	4.2869	4.1276	4.2248	4.2068	4.1946	4.1833	4.1904
3R-aminononanoic acid	174.148	C9H19NO2	3.6478	-	2.4453	2.727	2.6407	2.5262	2.5059	2.6951	2.2178	2.0739	2.218	2.1106	2.3557	2.1135	2.3078	2.5836	2.4746	2.3677	2.5723	2.5643	2.343	2.389	2.3101	2.4323
Caffeic Acid	181.048	C9H8O4	3.65797	Phenylpropanoids and polyketides	3.0718	2.8653	2.804	2.6359	2.959	2.7996	2.6086	2.7171	2.6905	2.639	2.706	2.4873	2.5088	2.67	2.7297	2.4334	2.9509	2.6822	2.5585	2.568	2.5573	2.5638
(S)-Argpyrimidine	275.113	C11H18N4O3	3.65952	Organic acids and derivatives	2.308	2.4264	2.0687	2.2652	2.3413	2.2588	2.2067	1.7162	1.9564	1.8511	2.1458	2.2438	2.0801	2.4433	2.3019	2.2424	2.3283	2.217	2.2864	2.2701	2.2483	2.2633
Methyl (3x,10R)-dihydroxy-11-dodecene-6,8-diynoate 10-glucoside	363.143	C19H26O9	3.6693	Lipids and lipid-like molecules	3.0953	3.0927	3.0423	3.0792	3.0361	3.0439	2.9979	2.896	3.158	3.0339	2.903	3.0609	3.0359	3.1796	3.0875	3.1117	3.1193	3.1676	2.9548	3.0075	2.9076	2.9915
Epicatechin	291.086	C15H14O6	3.6693	Phenylpropanoids and polyketides	4.0749	4.0091	4.0976	4.0358	4.1568	4.2259	4.1453	4.3738	4.1302	4.3147	4.2419	4.1881	4.1066	3.7193	3.8792	3.5824	3.8887	3.4994	4.0473	4.0282	4.0058	4.0236
Ketotifen-N-glucuronide	484.147	C25H27NO7S	3.66987	Organic oxygen compounds	2.2885	2.5225	2.0715	2.4014	2.6042	2.4217	2.8192	2.8037	2.5219	1.8454	2.0056	2.2915	0.751	1.7224	0.7682	1.4389	1.7867	0.7604	2.1223	2.0378	2.0691	2.1087
4-[5-(3-hydroxypropyl)-1-benzofuran-2-yl]-2-methoxyphenol	343.118	C18H18O4	3.66987	Phenylpropanoids and polyketides	2.7777	2.5746	2.5297	2.3546	2.7375	2.5982	2.6086	2.6187	2.3864	2.5973	2.4603	2.6476	2.6619	2.7818	2.5776	3.0293	2.6112	2.6897	2.624	2.5961	2.5912	2.6114
Antiarol	167.069	C9H12O4	3.67963	-	3.1731	3.1879	3.1111	3.1672	3.1803	3.2399	3.1892	3.1536	3.164	3.1089	3.1393	3.1829	3.0059	3.2009	3.1045	3.14	3.1401	3.1056	3.0975	3.0739	3.0382	3.0751
3-(3,4-Dihydroxybenzyl)-7-hydroxy-5-methoxy-4-chromanone	349.127	C17H16O6	3.67963	Phenylpropanoids and polyketides	1.8418	1.9197	1.8421	1.9617	1.6306	1.462	1.446	0.9547	1.6444	0.9463	1.2069	0.7072	2.7115	2.8006	2.8245	2.92	2.671	2.8498	2.3982	2.3065	2.3943	2.4412
Nomilin	535.192	C28H34O9	3.6807	Lipids and lipid-like molecules	2.677	2.7345	2.6753	2.9176	2.8629	2.6839	2.383	2.2947	2.1337	2.256	2.2477	2.3637	2.3604	2.453	2.1828	2.3704	2.6611	2.2877	2.5948	2.5601	2.5334	2.5012
4-(3-hydroxybutyl)-2-methoxyphenol	241.108	C11H16O3	3.6807	Benzenoids	2.5489	2.6952	2.5432	2.5801	2.4671	2.4786	2.5093	2.2031	2.3604	2.3134	2.5266	2.4681	2.4915	2.5346	2.5868	2.5077	2.4034	2.5767	2.5289	2.5331	2.5141	2.5155
L-DOPA 3'-glucoside	401.159	C15H21NO9	3.6908	Organic acids and derivatives	4.0633	4.1227	4.0418	4.0795	3.7208	3.95	3.7712	3.4663	3.6546	3.6875	3.6642	3.7359	3.4481	3.4691	3.5383	3.547	3.4802	3.5333	3.711	3.7148	3.7024	3.7085
Indacaterol-8-O-glucuronide	603.211	C30H36N2O9	3.69085	Organic oxygen compounds	3.5084	3.5074	3.5674	3.5143	3.4551	3.4341	3.4586	3.5104	3.4569	3.6163	3.3851	3.4509	3.5044	3.516	3.5345	3.592	3.423	3.5175	3.5227	3.4937	3.4901	3.5077
2-Furanylmethyl propanoate	137.058	C8H10O3	3.70113	Organoheterocyclic compounds	3.3369	3.3243	3.2835	3.2845	3.2751	3.3209	3.3368	3.29	3.3803	3.3107	3.2197	3.269	3.2466	3.3006	3.2924	3.2058	3.2528	3.2013	3.2098	3.2118	3.251	3.2493
8-Acetylegelolide	273.111	C16H20O6	3.70113	Organoheterocyclic compounds	2.9777	2.955	2.89	2.868	2.9418	2.9779	2.9205	2.8912	3.0388	2.9373	2.8544	2.8876	2.9176	2.9693	2.9472	2.9102	2.8664	2.9484	2.83	2.84	2.8471	2.8243
4-Hydroxy-3-methoxycinnamaldehyde	177.055	C10H10O3	3.70168	Benzenoids	3.0422	3.0871	3.0132	3	3.1301	3.0199	3.0196	3.0515	2.9573	2.9895	2.9187	3.0702	3.014	2.9488	3.1268	2.9806	2.9823	3.1985	3.0547	3.0383	3.0584	3.0628
3,4-Dihydro-2H-1-benzopyran-2-one	295.097	C9H8O2	3.71168	Phenylpropanoids and polyketides	2.3232	2.1761	2.1117	1.9335	1.5803	1.9291	2.0487	1.8779	1.8627	1.7691	2.001	2.1015	2.2663	2.2782	2.3259	2.2441	2.0119	2.2666	2.1621	2.102	2.2076	2.1108
4-Hydroxycinnamyl aldehyde	147.046	C9H8O2	3.71168	Phenylpropanoids and polyketides	4.1734	4.0399	4.1129	4.0265	4.0309	4.0817	3.9713	4.0321	3.9204	3.9343	3.9434	4.0394	4.1143	4.0706	4.2284	4.1604	3.9737	4.094	4.0179	4.0152	4.0169	4.0355
4'-Methylliquiritigenin 7-rhamnoside	449.182	C22H24O8	3.71247	Phenylpropanoids and polyketides	3.1762	3.1038	3.0465	3.2259	3.2447	3.0901	3.1066	2.9099	2.9847	2.8433	2.914	3.0992	3.0254	3.2237	3.0159	3.2552	3.2547	3.1343	3.0627	3.052	3.0478	3.0397
Methyl (3x,4E,10R)-3,10-dihydroxy-4,11-dodecadiene-6,8-diynoate 10-glucoside	361.13	C19H24O9	3.72297	Lipids and lipid-like molecules	3.0389	2.9886	3.0035	2.9871	2.9656	2.9293	2.8647	2.7626	2.9152	2.8658	2.849	2.9102	2.8435	2.8894	2.997	2.9685	2.9919	2.9838	2.8102	2.822	2.8413	2.8393
Coriandrone E	247.061	C13H12O5	3.73235	Organoheterocyclic compounds	1.0796	1.323	1.2908	1.5485	1.2253	1.0802	1.7354	1.9766	1.6558	1.8278	1.6197	1.7416	1.5433	1.6858	1.8616	1.6433	1.5708	1.852	1.8833	1.7586	1.6724	1.7179
Secoeremopetasitolide A	387.145	C19H26O7	3.73235	Lipids and lipid-like molecules	2.8202	3.0012	2.8969	2.8241	3.0562	2.8565	2.773	2.8238	3.135	3.0249	2.9114	2.9661	3.0799	3.1298	3.0634	3.1528	2.8572	3.0834	2.9966	2.9713	2.9896	2.9891
5-Methoxytryptophan	217.097	C12H14N2O3	3.7448	Organoheterocyclic compounds	2.805	2.807	2.8972	2.779	2.9484	2.8374	2.5283	2.6292	2.7472	2.5245	2.6087	2.6092	2.5783	2.7549	2.5911	2.6487	2.7827	2.7389	2.6277	2.6463	2.6341	2.5946
1-(3,4-dihydroxyphenyl)-3-(4-methoxy-1-benzofuran-5-yl)propane-1,3-dione	390.095	C18H14O6	3.7448	Phenylpropanoids and polyketides	3.51	2.4968	2.2194	2.277	2.5632	1.6363	2.7605	2.5243	2.905	1.8085	2.8764	2.5558	2.5558	2.8132	2.7163	2.7644	3.3619	2.6062	2.6013	2.5608	2.5984	2.5743
Pinostilbenoside	405.154	C21H24O8	3.7448	Phenylpropanoids and polyketides	3.4298	3.4458	3.3244	3.4838	3.5423	3.38	3.3983	3.2722	3.3343	3.2463	3.205	3.4373	3.2812	3.4045	3.315	3.3959	3.6536	3.2699	3.31	3.3035	3.3269	3.2948
Methyl helianthenoate A glucoside	345.132	C19H24O8	3.7668	Lipids and lipid-like molecules	3.959	3.8743	3.7793	3.8162	4.0048	3.871	3.8753	3.8364	3.853	3.7555	3.7338	3.881	3.8542	3.8902	3.8196	3.8593	4.0643	3.8351	3.7985	3.7657	3.7904	3.77
Cappariloside B	541.173	C22H28N2O11	3.78518	Organic oxygen compounds	3.7037	3.6363	3.6937	3.6566	3.7645	3.7058	3.6901	3.755	3.7565	3.6822	3.6991	3.7305	3.7374	3.6866	3.7775	3.7498	3.6378	3.6924	3.7022	3.7143	3.7032	3.7118
ETHYL SYRINGATE	227.09	C11H14O5	3.78913	-	3.2892	3.2046	3.2471	3.2075	3.2178	3.2238	3.2863	3.1566	3.1249	3.139	3.0451	3.3626	3.1501	3.1816	3.3359	3.2745	3.2415	3.2546	3.1465	3.1275	3.1352	3.1234
ORSELLINIC ACID, ETHYL ESTER	197.08	C10H12O4	3.78913	-	3.5971	3.5605	3.5483	3.4932	3.5197	3.5659	3.5138	3.4594	3.4549	3.4765	3.4063	3.5685	3.4897	3.5469	3.6636	3.5661	3.568	3.55	3.4511	3.4514	3.4404	3.4279
Luteolinidin 3-O-glucoside	456.105	C21H21O10+	3.78913	Phenylpropanoids and polyketides	3.0802	2.6988	2.9036	2.6454	2.558	1.0331	2.8302	2.3245	2.204	0.8586	2.243	1.8065	1.9434	2.7343	1.7807	2.1639	2.6844	2.817	2.0404	1.9618	2.0643	1.9091
(3Z)-3-hydroxy-4-(3-methoxyphenyl)but-3-en-2-one	175.074	C11H12O3	3.8008	Phenylpropanoids and polyketides	1.9979	1.971	1.9678	1.9169	1.9564	1.9775	1.6078	1.9202	1.9835	2.0213	1.7916	2.0036	2.1056	2.1516	1.958	2.0311	2.1684	2.1138	1.9157	1.8964	1.848	1.8951
Dide-O-methylsimmondsin	736.274	C14H21NO9	3.8113	Organic oxygen compounds	3.7173	3.7213	3.7466	3.7281	3.629	3.6872	3.7165	3.6113	3.7375	3.7236	3.6889	3.7278	3.7065	3.6336	3.6961	3.7485	3.5629	3.7073	3.6275	3.6094	3.5989	3.5948
Lariciresinol	405.155	C20H24O6	3.81652	-	3.8533	3.6064	3.5846	3.6098	3.8488	3.729	3.4732	3.4603	3.5394	3.563	3.5188	3.5709	3.6485	3.5092	3.6235	3.6879	3.5873	3.7295	3.6502	3.6328	3.6464	3.6613
5,7-DIHYDROXY-4-METHYLCOUMARIN	191.034	C10H8O4	3.81652	-	3.3236	3.1236	3.2684	3.2933	2.9091	3.2455	3.2768	3.4423	3.2505	3.0499	3.163	3.312	3.0196	3.1606	3.1665	2.944	3.1937	3.1862	3.1465	3.1567	3.195	3.138
Flacourtin	451.125	C20H22O9	3.82752	Organic oxygen compounds	3.2502	3.3904	3.1097	3.4793	3.5407	3.3538	3.2455	3.379	2.9232	2.4402	2.8027	2.9421	3.0009	3.5751	3.027	3.255	3.7394	2.9154	3.3339	3.3287	3.3274	3.3448
Rutalinium	329.102	C16H20NO4+	3.84497	Organoheterocyclic compounds	3.1655	3.199	3.1531	3.1263	3.1635	3.1255	3.2074	3.1595	3.1408	3.1018	3.0548	3.1706	3.0847	3.1201	3.148	3.1588	3.2259	3.0568	3.0719	3.0635	3.0474	3.0294
Methyl (R)-9-hydroxy-10-undecene-5,7-diynoate glucoside	413.146	C18H24O8	3.84835	Lipids and lipid-like molecules	0.224	0.4025	0.9415	1.0916	1.3742	0.8929	0.9478	0.0283	0.0276	0.025	0.0292	0.5307	2.1815	2.411	2.1449	2.1743	2.5288	2.174	1.6985	1.8554	1.8692	1.8596
Glycylprolylhydroxyproline	320.099	C12H19N3O5	3.84835	Organic acids and derivatives	1.9046	1.9942	1.3066	1.597	0.903	1.7278	1.712	1.3971	1.6797	1.5917	1.6713	1.8084	1.5763	1.7768	1.7344	1.7954	1.4273	1.8869	1.7379	1.7136	1.723	1.7598
Isocyclocalamin	483.206	C27H34O9	3.85835	Lipids and lipid-like molecules	2.1971	2.1413	2.3231	1.9819	2.1278	2.112	2.1228	2.0239	2.1329	1.9165	1.9434	1.9828	2.1991	2.3487	2.1167	1.7134	1.5853	2.2586	2.1399	2.2113	2.1467	2.1968
Syringic acid	199.059	C9H10O5	3.86712	Benzenoids	2.0601	2.2468	1.8838	1.82	1.902	1.9726	1.9278	1.9238	1.867	1.8836	1.6972	1.9421	1.691	1.8585	1.9961	1.8497	1.8769	2.0001	1.8503	1.84	1.867	1.862
3-Hydroxyisoheptanoic acid	145.087	C7H14O3	3.86902	Organic acids and derivatives	1.9535	2.0723	1.4242	1.934	1.5842	1.9432	1.9771	1.7952	2.0151	1.9979	2.0016	2.0776	2.0832	2.2209	2.1769	2.1705	2.1084	2.1143	1.963	2.0262	2.0627	2.0788
3-octenoylglycine	232.153	C10H17NO3	3.87762	Organic acids and derivatives	3.2431	3.3488	3.1412	3.2433	3.1016	3.1888	3.0545	2.8627	3.0359	2.9602	3.0599	3.1458	3.168	3.2236	3.188	3.1644	3.2073	3.1802	3.0605	3.0582	3.058	3.0609
Phloridzin	481.137	C21H24O10	3.87902	Phenylpropanoids and polyketides	1.9843	1.3351	1.673	2.0888	2.8301	2.4167	2.1685	2.5417	2.1738	2.4212	2.6645	3.1622	2.4592	2.3083	1.7722	1.7814	2.4313	2.0137	2.113	2.2625	2.2069	2.1511
3,5,6,7-tetrahydroxy-2-phenyl-3,4-dihydro-2H-1-benzopyran-4-one	287.056	C15H12O6	3.87902	Phenylpropanoids and polyketides	3.0296	2.5654	2.8032	2.5118	2.9116	2.9221	2.8192	3.1104	2.674	2.8727	2.9658	2.8298	3.2693	2.9368	3.1664	2.9245	3.3394	3.0065	2.8577	2.8144	2.8105	2.865
4-Hydroxyphenylacetylglutamic acid	326.06	C13H15NO6	3.88928	-	3.0408	2.6419	2.9538	2.7772	2.8344	1.4033	2.7463	2.5102	2.3223	1.7905	2.7319	2.2336	2.1795	2.6054	2.4235	1.9608	2.6412	2.5939	2.197	2.1952	2.1786	2.1822
Triethylene Glycol Monomethyl Ether	129.09	C7H16O4	3.89962	Organic oxygen compounds	1.9485	2.0226	1.9244	1.8483	1.7236	1.952	1.843	1.5754	1.6862	1.6779	1.7937	1.8502	1.8925	1.8995	1.9418	1.8652	1.7218	1.9298	1.8318	1.7404	1.8197	1.7304
3-hydroxyheptanoic acid	169.085	C7H14O3	3.94328	Organic acids and derivatives	2.4715	2.6623	2.3438	2.4504	2.3718	2.5002	2.2661	2.0739	2.2768	2.1349	2.307	2.3142	2.4797	2.5391	2.5507	2.4	2.3826	2.4141	2.3622	2.2812	2.3134	2.3283
Cis-2-Carboxycyclohexyl-acetic acid	187.095	C9H14O4	3.94328	-	2.6591	2.7672	2.6472	2.6679	2.6163	2.6716	2.4875	2.34	2.4475	2.3442	2.5241	2.5222	2.6513	2.7139	2.7289	2.5904	2.6147	2.6464	2.5345	2.513	2.5208	2.5131
3-Hydroxy-5Z-octenyl acetate	231.124	C10H18O3	3.95152	Lipids and lipid-like molecules	3.4054	3.5412	3.221	3.3667	3.3125	3.2988	3.2361	3.0944	3.2405	3.139	3.233	3.3263	3.2852	3.365	3.4373	3.3413	3.2406	3.265	3.2706	3.3161	3.312	3.3069
Fluticasone propionate	499.173	C25H31F3O5S	3.972	Lipids and lipid-like molecules	3.1067	3.1007	3.1975	3.0611	3.1484	3.0789	3.0153	3.1453	3.0613	2.9134	2.8824	3.036	3.4299	3.4163	3.3617	3.348	3.3771	3.3543	3.1886	3.2145	3.2142	3.233
Amygdalin	502.158	C20H27NO11	3.972	Organic oxygen compounds	2.4917	3.079	2.3871	2.738	2.8601	2.9331	2.4541	2.9897	2.6363	2.5196	2.2605	2.5698	2.849	2.7663	2.5443	2.8428	2.8341	2.5424	2.7254	2.7656	2.7467	2.7813
Peperinic acid	227.092	C10H14O3	3.972	Organoheterocyclic compounds	3.0392	2.9488	2.9246	3.0515	2.975	3.0342	2.9311	2.7504	2.9314	2.8189	3.0077	2.9264	3.1569	3.1134	3.1558	3.1153	3.0496	3.0469	2.9936	3.0565	3.0389	3.0585
7-beta-D-Glucopyranosyloxybutylidenephthalide	331.117	C18H22O8	3.97678	Organic oxygen compounds	4.1227	4.0889	4.0779	4.1254	4.0864	4.0932	4.1392	4.0551	4.1523	4.0905	4.0799	4.1723	4.0867	4.077	4.0533	4.1092	4.0872	4.1053	4.0161	4.0044	4.0076	4.0012
Sialyllacto-N-tetraose a	979.334	C37H62N2O29	3.982	Organic oxygen compounds	3.4177	3.342	3.4175	3.3136	3.3813	3.3733	3.2632	3.3298	3.3716	3.3725	3.3299	3.2912	3.3768	3.3483	3.4548	3.4983	3.3648	3.3361	3.3816	3.3948	3.3971	3.3929
5-Hydroxy-p-mentha-6,8-dien-2-one	211.097	C10H14O2	3.982	Lipids and lipid-like molecules	2.2272	2.4342	2.2682	2.2171	2.2376	2.0817	2.0808	1.8715	2.3255	2.1505	2.1892	2.1498	2.1552	2.3299	2.2847	2.3017	2.2359	2.2087	2.1933	2.1805	2.2524	2.2796
Kinetin-7-N-glucoside	419.166	C16H19N5O6	3.98712	Organic oxygen compounds	3.4463	3.4843	3.4321	3.4347	3.3857	3.4135	3.4152	3.2641	3.4183	3.4315	3.246	3.3669	3.3389	3.3085	3.3419	3.4003	3.333	3.3222	3.3205	3.2774	3.3007	3.3364
Melilotoside C	450.274	C47H78O16	4.00912	Lipids and lipid-like molecules	2.2559	2.3269	2.3727	2.147	2.4401	2.3468	2.4036	2.5249	2.3967	2.3913	2.3223	2.2634	2.2114	2.1096	2.3225	2.2546	2.0528	2.1206	2.3339	2.1969	2.3552	2.3295
Neoacrimarine E	650.175	C35H35NO9	4.01317	Organoheterocyclic compounds	2.0854	1.7686	1.6703	1.7121	1.8751	2.0359	1.7377	2.1008	2.1646	2.3172	1.9596	2.0492	2.1173	1.9045	2.165	2.1242	2.1066	2.0097	2.1339	2.1575	2.1238	2.1255
1-(4-methoxy-1-benzofuran-5-yl)ethan-1-ol	175.077	C11H12O3	4.02078	Organoheterocyclic compounds	2.1965	2.0463	2.0987	2.1415	2.0034	1.751	1.6704	1.8526	1.9669	1.9756	1.5695	2.1015	1.6555	1.9111	1.7529	1.6664	1.7475	1.9367	1.7554	1.7332	1.7577	1.6822
Allyl tiglate	105.069	C8H12O2	4.02078	Lipids and lipid-like molecules	2.0738	2.0531	1.8722	1.6589	1.4494	2.0332	1.5078	1.4006	1.3855	1.5334	1.8151	1.695	2.0536	1.9819	1.8438	1.9689	1.6621	1.9156	1.7278	1.6413	1.7307	1.7429
Cinnamaldehyde	133.064	C9H8O	4.02078	Phenylpropanoids and polyketides	3.4354	3.3891	3.2339	3.098	3.0206	3.3052	2.8119	2.8437	2.905	2.9388	3.1437	3.0266	3.441	3.3517	3.1219	3.3097	3.149	3.3306	3.1248	3.0437	3.0619	3.0433
P-HPEA-EDA	325.108	C17H20O5	4.023	Benzenoids	2.4849	2.3168	2.3525	2.2558	2.1864	2.4245	2.2016	2.2647	2.194	2.3331	2.1635	2.1241	2.2769	2.2916	2.3241	2.05	2.1957	2.517	2.23	2.2094	2.328	2.296
(S)-Multifidol 2-[apiosyl-(1->6)-glucoside]	549.178	C22H32O13	4.023	Organic oxygen compounds	2.6926	2.6177	2.6247	2.6315	2.7738	2.7407	2.5462	2.7214	2.6496	2.6973	2.7369	2.6389	2.3764	2.4153	2.5464	2.5279	2.3808	2.3299	2.5659	2.5983	2.6064	2.5934
Erinapyrone A	107.048	C7H10O3	4.03112	Organoheterocyclic compounds	2.4693	2.665	2.4179	3.0366	2.9984	2.7694	2.7879	2.9745	2.8084	2.3489	2.612	2.4508	2.38	2.7831	2.4129	2.3312	3.0087	2.223	2.411	2.3493	2.3502	2.3563
Salicylaldehyde	123.043	C7H6O2	4.05262	-	2.9204	2.9589	2.7713	2.6538	2.8145	2.9316	2.6256	2.6682	2.4667	2.4033	2.7143	2.5835	2.9523	2.896	3.0835	3.0226	2.898	2.8994	2.7566	2.6643	2.6877	2.6858
Heteroflavanone B	451.171	C24H28O7	4.05262	Phenylpropanoids and polyketides	3.782	3.8078	3.7835	3.7658	3.6863	3.7738	3.7445	3.6625	3.7793	3.7253	3.6746	3.7797	3.7784	3.8118	3.7809	3.8281	3.8278	3.7732	3.6626	3.6547	3.6667	3.6477
Gossyvertin	295.097	C16H18O4	4.05367	Lipids and lipid-like molecules	2.785	2.6321	2.731	2.2793	2.4554	2.7193	2.5926	2.7601	2.661	2.7309	2.5978	2.5588	2.97	2.9266	2.8528	2.6637	2.7334	2.8896	2.6497	2.6923	2.6836	2.6387
Stachyoside A	525.177	C21H34O15	4.06383	Lipids and lipid-like molecules	3.5633	3.4257	3.5464	3.4445	3.4166	3.4487	3.3509	3.4872	3.6003	3.4726	3.2931	3.4017	3.6049	3.6705	3.7327	3.6556	3.532	3.6178	3.5253	3.5584	3.5328	3.554
3'-Sialyl-3-fucosyllactose	800.247	C29H49NO23	4.06987	Organic oxygen compounds	3.0176	2.7865	3.0671	2.9339	2.9298	2.8934	2.902	2.9503	2.9573	3.0575	2.8776	2.8026	3.1454	3.025	3.2359	3.2846	3.0608	3.1175	3.006	3.0665	3.0469	3.0471
Egonol	371.114	C19H18O5	4.06987	Phenylpropanoids and polyketides	3.0577	2.8425	2.943	2.7863	3.02	3.1642	2.7108	2.9617	2.7061	2.6971	2.5654	2.6566	2.7755	2.3968	2.7346	2.3587	2.3837	2.4102	2.6518	2.5694	2.6336	2.637
2,6-Dimethoxyphenol	155.069	C8H10O3	4.08545	Benzenoids	2.5961	2.5895	2.5372	2.4452	2.4833	2.6049	2.4241	2.4338	2.4685	2.3986	2.4986	2.4484	2.5492	2.4845	2.5598	2.5608	2.4641	2.5431	2.4805	2.3603	2.4728	2.4124
4-Hydroxy-3,5-dimethoxybenzaldehyde	183.064	C9H10O4	4.09578	-	3.6562	3.5973	3.5974	3.5412	3.5409	3.6528	3.5373	3.5158	3.5583	3.5279	3.5231	3.5523	3.581	3.5749	3.6303	3.6216	3.5655	3.623	3.5339	3.5109	3.5667	3.4772
Arginyl-Asparagine	269.139	C10H20N6O4	4.1005	Organic acids and derivatives	1.9743	2.0411	1.2543	1.4166	1.6948	1.4655	1.4663	1.3128	1.4742	1.1305	0.9081	1.6835	1.6044	1.5759	1.5274	1.5879	1.6259	1.3954	1.447	1.4482	1.6709	1.5932
Cafamarine	553.206	C26H36O10	4.12995	Organoheterocyclic compounds	4.3556	4.3644	4.3569	4.3639	4.3162	4.3578	4.3024	4.2469	4.3469	4.3105	4.2856	4.3207	4.3838	4.3701	4.3651	4.4303	4.4	4.3553	4.2753	4.2596	4.261	4.2574
Guaiacol	125.059	C7H8O2	4.12995	Benzenoids	1.5751	2.4201	1.7809	0.0432	1.99	2.1729	1.6982	0.7206	0.0343	0.0309	2.116	0.0368	2.1851	2.016	2.2829	2.064	2.0932	1.8427	1.9043	1.9439	1.8531	1.8437
4-Methyldaphnetin	193.048	C10H8O4	4.15162	-	2.0024	2.1449	2.0979	2.0933	2.528	2.3673	1.7164	2.3724	1.9319	0.6432	1.9792	1.7307	0.7031	0.7417	0.7161	0.696	0.7345	0.7016	1.5116	1.5952	1.5434	1.6464
Sialyl Lex tetra	963.336	C37H62N2O28	4.1615	Organic oxygen compounds	3.8933	3.801	3.8989	3.8415	3.8656	3.837	3.8033	3.7942	3.8202	3.8485	3.8292	3.7722	3.9513	3.8671	3.9636	3.9751	3.8238	3.9362	3.89	3.8884	3.8709	3.881
6,7-Dimethoxy-3',4'-methylenedioxyflavanone	329.102	C18H16O6	4.16177	-	2.8731	2.7702	2.6957	2.7418	2.6848	2.7739	2.809	2.774	2.8268	2.7096	2.699	2.7679	2.8243	2.844	2.824	2.8603	2.8956	2.7826	2.6788	2.6466	2.6904	2.6305
Tipranavir	601.196	C31H33F3N2O5S	4.17183	Phenylpropanoids and polyketides	2.6868	2.5	3.0368	2.8121	2.4228	2.6036	2.4694	2.594	2.7623	2.6164	2.3911	2.6645	3.1656	3.0608	3.0528	3.0787	2.9246	3.1081	2.7636	2.8632	2.8619	2.7443
Methionyl-Hydroxyproline	307.097	C10H18N2O4S	4.18183	Organic acids and derivatives	2.6858	2.2626	2.4503	2.3048	2.4116	2.6023	2.5078	2.7749	2.5647	2.6836	2.4867	2.5211	2.5856	2.4329	2.6267	2.3892	2.5186	2.6642	2.4563	2.5557	2.5651	2.5734
7,8-Dihydropteroic acid	295.097	C14H14N6O3	4.18183	Organoheterocyclic compounds	2.1664	1.8035	2.0957	1.806	1.5798	2.1533	1.9968	2.3133	2.2199	2.289	2.0608	1.9794	2.1803	2.0009	2.2517	1.9806	2.1385	2.3542	2.0923	1.9484	2.1354	2.1781
5,4'-Dimethoxy-7-hydroxyflavone	297.077	C17H14O5	4.19217	-	2.6061	1.9925	2.196	2.3375	2.1442	2.3348	2.4592	2.6867	2.5368	2.4531	2.229	2.1836	1.7853	1.7686	2.4155	1.8912	1.9192	2.2479	2.1499	2.0448	2.1685	2.2535
(4S,8R)-8,9-Dihydroxy-p-menth-1(6)-en-2-one	229.108	C10H16O3	4.19217	Lipids and lipid-like molecules	2.443	2.463	2.301	2.3936	2.3836	2.4237	2.3868	1.8953	2.3069	1.8743	2.2032	2.0656	2.3531	2.4947	2.359	2.4046	2.4602	2.5097	2.3417	2.3509	2.266	2.4222
Cymorcin diglucoside	535.199	C22H34O12	4.21233	Organic oxygen compounds	2.3645	2.1421	2.3199	2.2711	2.4192	2.3793	2.2758	2.3665	2.3997	2.5036	2.3893	2.3014	2.3432	2.1127	2.189	2.4159	2.1373	1.9967	2.3882	2.415	2.2691	2.4232
2-Hydroxydecanoate	230.174	C10H20O3	4.2266	-	2.0907	2.2608	1.9228	2.1037	1.1789	2.1654	1.7597	1.4862	1.7075	1.5848	1.7006	1.6515	2.2606	2.4258	2.1837	1.9993	2.4109	2.5116	1.8245	1.8463	1.779	1.8128
M-Coumaric acid	165.053	C9H8O3	4.23793	Phenylpropanoids and polyketides	2.1047	2.3769	2.0084	1.2823	1.7471	2.1176	1.8799	1.9296	1.8498	1.6553	1.9757	2.2713	2.0892	1.9588	1.8916	1.7986	2.2095	1.7005	1.8343	1.8396	1.8773	1.8377
Trans-O-Methylgrandmarin	327.087	C16H18O6	4.24248	Phenylpropanoids and polyketides	2.1473	1.9332	2.2024	2.2189	2.2694	2.2926	2.2591	2.3949	2.2451	2.1989	2.094	2.2289	1.6525	1.6758	2.1186	2.0606	1.8852	2.1509	2.1014	2.162	2.1393	2.1455
19-Hydroxydeacetylnomilinic acid 17-beta-D-glucopyranoside	721.254	C32H46O16	4.24248	Lipids and lipid-like molecules	4.436	4.3665	4.466	4.3951	4.4131	4.3739	4.2814	4.3449	4.3571	4.3658	4.3033	4.2526	4.5543	4.4683	4.566	4.5107	4.4156	4.5135	4.4393	4.4642	4.4452	4.4304
()-Taxifolin	305.065	C15H12O7	4.2481	-	2.7083	2.5294	2.7539	2.6101	2.5297	2.8388	2.3226	2.6492	2.2366	2.4308	2.7032	2.8705	2.7653	2.6591	2.5318	2.1411	3.7341	2.4658	2.6916	2.6684	2.6688	2.6885
Ferulic acid	195.064	C10H10O4	4.2481	Phenylpropanoids and polyketides	2.1535	2.1203	2.137	2.1255	2.4393	2.3843	2.2398	2.2829	2.113	2.0358	2.1209	2.1671	1.5998	1.8911	1.629	1.3339	0.9885	1.5634	1.9204	1.9471	2.0055	1.9714
2-[3-hydroxy-4-(methoxymethyl)phenyl]-3,4-dihydro-2H-1-benzopyran-3,5,6,7-tetrol	335.112	C17H18O7	4.2481	Phenylpropanoids and polyketides	2.9482	2.9704	2.8111	2.8158	2.8874	2.9411	2.8294	2.8716	2.9329	2.8799	2.8879	2.8789	2.6198	2.6594	2.681	2.6608	2.445	2.7007	2.7076	2.7289	2.7322	2.6908
P-Salicylic acid	137.024	C7H6O3	4.31415	Benzenoids	2.2877	2.2252	2.24	3.0147	3.0721	2.2256	2.8156	2.6202	2.2585	2.1389	2.4065	2.714	1.8002	2.3899	2.3352	2.4881	2.4216	2.514	2.4592	2.4612	2.3768	2.3736
2-Hydroxy-2,6,6-trimethylcyclohexanone	201.113	C9H16O2	4.31415	Organic oxygen compounds	2.1242	2.3463	2.1102	2.2722	2.0315	2.062	2.0151	1.7511	2.1283	1.7497	2.1788	2.0951	2.3461	2.2424	2.1868	2.0994	2.0097	2.1895	2.1991	2.0871	2.1689	2.0408
Biotripyrrin-b	486.163	C25H27N3O6	4.31415	Organoheterocyclic compounds	2.7249	3.2469	2.7832	2.7161	2.8392	2.7518	3.1033	3.0246	2.7465	2.5607	2.5517	2.8112	1.9198	2.2799	2.0944	2.3273	2.5889	2.0507	2.6543	2.705	2.7401	2.694
2-Isopropyl-5-methylfuran	169.087	C8H12O	4.33448	Organoheterocyclic compounds	2.2405	2.2819	2.2319	2.3115	1.9816	2.1933	2.2469	1.8002	2.2445	2.1827	2.1551	2.1959	2.2086	2.2467	2.2167	2.235	2.1007	2.1825	2.1445	2.2425	2.2321	2.1763
3',7-Dihydroxy-4'-methoxyisoflavanone	331.082	C16H14O5	4.33448	Phenylpropanoids and polyketides	1.4245	1.0578	1.7951	1.5544	1.4037	1.1604	1.6831	1.505	1.5086	1.5264	1.044	1.8073	1.9868	1.8732	2.2141	2.0992	1.973	2.028	1.5671	1.7024	1.7742	1.6897
Aquifoliunine EIII	784.251	C36H45NO17	4.33448	-	3.5707	3.4607	3.6476	3.5775	3.5121	3.4649	3.4224	3.5287	3.6046	3.6092	3.5442	3.4804	3.8542	3.6581	3.8358	3.8127	3.4976	3.7723	3.6287	3.6491	3.6405	3.654
Glyzarin	293.082	C18H14O4	4.36498	Phenylpropanoids and polyketides	3.4119	3.091	3.2894	3.064	3.122	3.2896	3.2151	3.3672	3.2075	3.2041	3.1348	3.1197	3.1661	3.1725	3.1727	3.0127	3.109	3.3129	3.1614	3.1835	3.174	3.1641
Sonchuionoside C	431.166	C19H30O8	4.37923	Lipids and lipid-like molecules	3.076	2.9293	2.8001	2.9029	3.105	3.016	2.8986	2.9697	2.9394	2.9604	2.9131	2.9081	2.8202	2.8936	2.8358	2.9292	2.9132	2.7891	2.9009	2.8311	2.8649	2.8792
Musabalbisiane A	477.142	C23H28O12	4.39532	-	2.626	2.8617	2.4075	2.0644	2.9557	2.5504	2.9714	2.9945	2.9744	2.0882	2.4888	2.5557	0.6546	2.0224	0.6271	1.9076	0.6118	0.6199	2.4038	2.4339	2.5056	2.4216
Cis-Ferulic acid [arabinosyl-(1->3)-[glucosyl-(1->6)]-glucosyl] ester	683.242	C27H38O18	4.40043	Organic oxygen compounds	4.345	4.3168	4.3392	4.3518	4.3255	4.3365	4.3187	4.3389	4.3369	4.3553	4.3414	4.3319	4.2453	4.1842	4.2232	4.2798	4.1586	4.2273	4.2978	4.268	4.2716	4.2663
3-Oxa-9-azoniatricyclo[3.3.1.02,4]nonane, 9-ethyl-7-hydroxy-9-methyl-	184.132	C10H17NO2	4.42175	-	0.8616	1.5518	1.6942	1.5277	1.2868	1.627	1.202	0.75	1.4396	1.3118	1.6136	1.4848	1.6498	1.7744	1.5044	1.5427	1.818	1.5607	1.5501	1.3773	1.5929	1.4614
Asticolorin C	589.151	C33H28O9	4.42565	Organoheterocyclic compounds	1.3914	0.5736	1.644	1.0627	0.5697	0.5968	0.5667	0.5389	0.9375	0.915	0.5488	0.5719	1.9246	1.8053	1.7471	1.738	0.5463	1.8743	1.5799	1.7094	1.7131	1.4747
1-Hydroxypyrene	265.087	C16H12O	4.43632	Benzenoids	2.9707	2.7897	2.6564	2.4151	2.7365	2.9551	2.7338	3.0578	2.6614	2.7876	2.651	2.5331	2.6872	2.6165	2.6255	2.2837	2.3242	2.6843	2.6519	2.6397	2.6269	2.655
Hieracin	301.035	C15H10O7	4.45715	-	0.9773	0.9533	0.9311	0.9612	0.9486	1.5313	0.945	1.5504	0.9011	1.5283	1.2675	1.9463	0.9195	1.5209	0.9378	0.9217	3.613	0.9295	1.9222	1.9769	2.0037	2.0327
Riesling acetal	271.155	C13H22O3	4.46698	Organoheterocyclic compounds	2.1446	1.9185	2.2387	1.9778	2.3022	2.1816	2.2754	1.3745	1.8966	1.8704	1.9933	1.7251	2.06	1.872	2.0456	1.914	1.8372	2.3361	1.9725	1.8485	1.9799	1.9844
Hv-NCC-1	713.263	C35H42N4O10	4.46698	Organoheterocyclic compounds	2.3064	2.2834	2.1785	2.0739	2.1924	2.2989	2.3004	2.3242	2.3003	2.3954	2.374	2.0483	1.6555	2.1099	1.8457	2.0592	1.2938	1.9358	2.25	2.1635	2.188	2.1993
Trans-Cinnamic acid	149.059	C9H8O2	4.47475	Phenylpropanoids and polyketides	3.996	3.924	3.9001	3.7969	3.7361	3.9163	3.6862	3.6414	3.5989	3.5731	3.6377	3.785	4.0135	3.9778	4.0957	3.9994	3.8537	3.9086	3.762	3.7567	3.743	3.7728
6-Hydroxypentadecanedioic acid	333.192	C15H28O5	4.47782	Lipids and lipid-like molecules	2.1089	2.4086	2.0876	2.1872	1.8914	2.0875	1.9499	1.5733	1.9866	1.7176	1.9873	2.061	2.0659	2.4348	2.0776	2.1823	2.0736	2.1487	2.1647	2.1916	2.1494	2.1308
Cadabicine	470.189	C25H29N3O4	4.47782	Organic oxygen compounds	2.6663	2.5115	2.9223	2.6801	2.6826	2.9477	2.7621	3.0041	2.7818	2.7981	2.6288	2.736	2.4328	2.3956	2.423	2.1569	2.263	2.4016	2.859	2.8168	2.7975	2.8245
Benzenemethanol, 2-(2-hydroxypropoxy)-3-methyl-	219.1	C11H16O3	4.48592	-	3.8577	3.7235	3.6719	3.6766	3.7757	3.7848	3.4723	3.3946	3.5251	3.6024	3.489	3.5408	3.7106	3.5612	3.6953	3.6686	3.6365	3.7275	3.5971	3.5859	3.6026	3.6172
()-Camphoric acid	199.097	C10H16O4	4.4878	Organic acids and derivatives	2.6586	2.7712	2.4203	2.6394	2.5588	2.5767	2.4665	2.3031	2.382	2.2846	2.4321	2.5239	2.4362	2.608	2.5448	2.5992	2.3314	2.4535	2.5105	2.5393	2.4997	2.5044
2-Carboxy-4-dodecanolide	287.15	C13H22O4	4.4878	Organoheterocyclic compounds	1.3769	1.8614	1.2955	1.5	1.4338	1.3647	1.5162	0.57	1.5471	0.7147	1.355	1.3338	1.1791	1.5746	1.3995	1.5052	0.5776	1.4288	1.5437	1.5757	1.6494	1.3591
Glycyrrhizaflavonol A	369.1	C20H18O7	4.4878	Phenylpropanoids and polyketides	1.9277	1.8679	1.991	1.8541	2.25	2.0619	2.0832	2.3846	2.1278	2.3477	2.2642	1.9142	1.3216	1.146	1.3841	1.5863	1.1095	1.1194	1.752	1.7894	1.8842	1.8909
2-Phenylaminoadenosine	341.138	C16H18N6O4	4.49608	Nucleosides, nucleotides, and analogues	4.7711	4.605	4.4524	4.439	4.5566	4.6195	4.329	4.2759	4.4306	4.2911	4.4079	4.4165	4.5373	4.5227	4.4831	4.4861	4.5005	4.5774	4.4656	4.463	4.4478	4.4865
(3S,5R,6R,7E)-3,5,6-Trihydroxy-7-megastigmen-9-one	281.116	C13H22O4	4.50692	-	2.4858	2.311	2.0793	2.0691	1.2734	2.1187	2.0243	2.1452	1.7362	1.9703	1.9933	1.8371	2.5422	2.4032	2.2227	2.4007	2.413	2.4427	2.3668	2.0628	2.1863	2.1902
3',8-Dihydroxy-4',5',7-trimethoxyflavone	377.123	C18H16O7	4.51265	Phenylpropanoids and polyketides	2.8802	2.6574	2.6294	2.6902	2.7068	2.7725	2.7602	2.6962	2.6221	2.8176	2.5758	2.8095	2.6144	2.5469	2.5719	2.7455	2.6942	2.551	2.6846	2.6752	2.6365	2.6491
Nicotine glucuronide	380.181	C16H22N2O6	4.53325	Organic oxygen compounds	2.4405	2.9355	2.0875	2.4747	2.1907	2.3622	2.4497	1.828	2.3306	1.8752	2.3105	2.6539	2.321	2.749	2.3566	2.2998	3.0209	2.5699	2.5632	2.4257	2.5189	2.4058
Butyl (S)-3-hydroxybutyrate [arabinosyl-(1->6)-glucoside]	475.178	C19H34O12	4.53497	Lipids and lipid-like molecules	1.8575	1.5049	1.7603	0.9631	1.7024	1.9931	1.576	2.1481	1.7968	1.9284	1.8577	1.7774	1.9195	1.8203	1.4517	1.7195	1.5935	1.8607	1.8044	1.7778	1.7516	1.6299
Polyethylene, oxidized	225.113	C12H20O5	4.53497	Lipids and lipid-like molecules	3.3672	3.5015	3.0854	3.3041	3.2639	3.273	3.1989	3.0634	3.2326	3.0938	3.2455	3.2249	3.1884	3.2921	3.2305	3.2218	3.1372	3.2028	3.2511	3.2232	3.2144	3.2665
Albanin G	795.253	C45H44O11	4.55083	Phenylpropanoids and polyketides	3.9132	3.8652	4.0228	3.9536	3.8806	3.8717	3.9281	3.8857	3.9257	4.0095	3.9102	3.9321	4.0584	3.903	4.0519	4.0924	3.8681	4.0348	3.9719	3.9536	3.9404	3.9474
5-Hexyltetrahydro-2-oxo-3-furancarboxylic acid	259.119	C11H18O4	4.57713	Organoheterocyclic compounds	1.3494	1.799	0.7915	0.8202	1.7876	1.7033	1.1226	1.3801	0.7631	1.3337	1.4695	1.1677	1.5016	1.7322	1.3555	1.2104	1.2329	0.79	1.2682	1.172	1.1355	1.372
3,4,5-trihydroxy-6-[3-(2-phenylcyclobutyl)phenoxy]oxane-2-carboxylic acid	383.148	C22H24O7	4.59492	Phenylpropanoids and polyketides	2.9543	2.7746	2.9288	2.864	2.7453	2.7922	2.6522	2.7254	2.8514	2.7845	2.6997	2.8277	3.0669	3.0655	3.0218	2.9915	3.0134	3.0484	2.8487	2.8541	2.859	2.8525
2-(3-Hydroxyphenyl)ethanol 1'-glucoside	265.106	C14H20O7	4.59492	Organic oxygen compounds	3.2763	3.2034	3.2136	3.1457	3.178	3.1935	3.0218	2.9627	3.0886	3.1507	3.0575	3.0747	3.04	3.0625	3.0628	3.0442	3.1094	3.0843	3.0414	3.0167	3.0252	3.0218
Didymin	627.234	C28H34O14	4.61575	Phenylpropanoids and polyketides	4.4212	4.3696	4.4451	4.416	4.3502	4.3792	4.3854	4.3948	4.4603	4.4322	4.3613	4.4325	4.4252	4.3912	4.4055	4.4538	4.3795	4.4125	4.4082	4.3902	4.3915	4.3899
4-Methoxybenzyl acetate	181.085	C10H12O3	4.61575	Benzenoids	2.7803	2.774	2.8584	2.8281	2.6824	2.8249	2.8212	2.8397	2.9027	2.8853	2.8295	2.8582	2.7886	2.8039	2.7858	2.8674	2.8039	2.8086	2.7262	2.7451	2.7905	2.7716
Valtrate	177.053	C10H12O5	4.61575	Lipids and lipid-like molecules	2.8932	3.0309	3.0079	2.7697	2.9829	2.9571	2.9998	3.0168	2.9541	2.8686	2.9784	2.9244	2.7653	2.8679	2.78	2.9142	2.8283	2.8929	2.931	3.0289	2.8107	2.8127
Pergillin	283.096	C15H16O4	4.62642	Organoheterocyclic compounds	1.7472	1.468	0.0002	0.0002	2.111	2.012	0.9661	2.1099	0.0002	0.0001	1.8811	1.7367	0.0002	1.5763	0.0002	1.2179	1.0834	0.0002	1.8561	1.8332	1.9314	1.988
8-Deoxy-11,13-dihydroxygrosheimin	279.123	C15H20O5	4.6588	Lipids and lipid-like molecules	2.1809	2.291	1.2887	2.0004	2.0726	2.1443	1.9019	1.6845	1.7372	1.3406	1.7694	1.9543	1.6115	1.5916	1.9461	1.6029	1.3717	1.6298	1.835	1.8709	1.8356	1.851
Methyl 3-(4-methoxyphenyl)-2-oxopropanoate	209.08	C11H12O4	4.69908	-	4.0853	4.0808	4.1849	4.1228	4.0089	4.0657	4.1114	4.1023	4.2039	4.1614	4.0763	4.1506	4.1721	4.1282	4.1357	4.153	4.0897	4.152	4.0744	4.0726	4.0666	4.0707
5C-aglycone	271.098	C16H16O4	4.69947	Lipids and lipid-like molecules	3.4694	0.2114	0.7677	0.0215	2.954	0.0226	2.7044	0.7323	1.3272	1.2541	1.0202	1.7189	0.0193	1.6552	0.2789	2.0096	0.0194	1.276	1.3214	1.3367	1.4375	1.5142
Divanillyltetrahydrofuran ferulate	584.221	C30H32O8	4.71007	Lignans, neolignans and related compounds	4.1636	3.9356	3.9819	3.9382	4.1392	4.0113	3.9739	3.9735	4.0106	3.9918	3.9992	4.0366	3.9808	3.931	3.908	4.0928	3.8904	3.9413	3.9985	3.9907	3.9902	4.0032
Vermiculine	393.157	C20H24O8	4.72007	-	2.843	2.6117	1.8657	1.4321	2.8188	1.7933	2.4287	2.1437	1.8882	1.2115	2.9638	1.287	2.428	2.6263	3.0761	2.5561	2.7901	2.1831	2.2719	2.2569	2.225	2.2135
Verbasoside	988.368	C20H30O12	4.72007	Organic oxygen compounds	2.8023	2.705	2.9255	3.1398	2.8861	2.8591	2.9186	3.0038	3.0524	2.8735	2.9884	3.0725	2.4171	2.0005	2.6117	2.8469	2.6942	2.6975	3.0355	2.9239	3.0593	3.0061
Myricanene A 5-[arabinosyl-(1->6)-glucoside]	673.231	C32H42O13	4.72007	Phenylpropanoids and polyketides	2.6007	2.2958	2.3844	2.5445	2.4332	2.5198	2.3914	2.3509	2.078	2.1174	2.5014	2.3114	2.3341	2.3154	2.3877	2.589	2.278	2.3248	2.563	2.5382	2.5886	2.6306
()-Naringenin	271.061	C15H12O5	4.73997	-	2.1228	2.0913	2.3819	2.0742	2.2961	2.5379	2.3987	2.7926	2.3238	2.4104	2.44	2.6826	2.4433	2.4619	2.1129	1.9443	3.8302	2.0612	2.6605	2.6034	2.6236	2.6108
Trypanothione disulfide	704.29	C27H47N9O10S2	4.75173	Organic acids and derivatives	3.4856	3.3802	3.4227	3.3855	3.5768	3.4667	3.3942	3.4836	3.4586	3.5247	3.4727	3.3916	3.2169	3.2006	3.276	3.4393	3.19	3.2192	3.3802	3.3474	3.3839	3.3841
2-Naphthol	145.064	C10H8O	4.75173	Benzenoids	2.3499	2.2172	2.1371	1.8027	1.7711	2.2028	1.9249	2.1372	1.8637	2.0044	2.0813	2.0106	2.3367	2.3272	2.1617	2.0593	2.2618	2.2993	2.1998	2.101	2.1213	2.1099
3,11,12-Trihydroxy-1(10)-spirovetiven-2-one	269.174	C15H24O4	4.75173	Lipids and lipid-like molecules	2.2278	2.5023	1.9366	2.2243	2.1941	2.2434	2.1382	1.5427	1.7163	1.6579	2.0615	2.1548	2.1865	2.2856	2.2076	2.0822	2.2007	2.2549	1.858	2.0224	2.0265	2.0115
5,7-Megastigmadien-9-ol glucoside	401.218	C19H32O6	4.76047	Lipids and lipid-like molecules	2.231	2.3588	1.5948	2.0981	2.1674	2.0806	2.0316	1.2741	1.62	1.3757	1.9342	2.2132	1.6556	2.0962	1.9682	2.0762	1.8437	1.8278	1.9552	2.0867	2.0785	1.8613
Mozambioside	547.196	C26H36O10	4.7619	Organoheterocyclic compounds	4.0381	3.9657	4.0332	4.007	4.0908	4.0397	3.9676	4.0511	4.0196	4.0878	4.0023	3.9903	3.9554	3.8659	3.8402	3.9259	3.7503	3.8427	4.0917	4.0682	4.0622	4.0652
Nepetaside	385.128	C16H26O8	4.7619	Lipids and lipid-like molecules	4.8402	4.8279	4.8365	4.7939	4.9583	4.8774	4.8002	4.882	4.8479	4.9538	4.8431	4.7923	4.663	4.6374	4.6347	4.6865	4.5586	4.6128	4.7921	4.7804	4.772	4.782
Natamycin	688.292	C33H47NO13	4.78273	Organic oxygen compounds	2.2945	2.1283	2.3602	2.4757	2.4015	2.3175	2.5577	2.5725	2.5547	2.6333	2.5058	2.6298	2.2991	2.359	2.3485	2.4986	2.2095	2.3352	2.5553	2.5096	2.4552	2.4661
Myricanol 5-glucoside	565.206	C27H36O10	4.78273	Phenylpropanoids and polyketides	5.0107	5.0057	5.0413	5.0039	4.9679	4.9907	4.9764	4.9756	5.0685	5.0336	4.9689	5.0043	5.015	4.9674	4.9695	4.99	4.9289	4.9571	4.9765	4.9599	4.9539	4.9557
3-Fucosyllactose	521.18	C18H32O15	4.79323	Organic oxygen compounds	4.6193	4.5799	4.7768	4.6699	4.3768	4.5166	4.4423	4.4007	4.5117	4.4028	4.3887	4.5171	5.0764	4.9376	4.9869	4.9205	5.0075	4.9832	4.7244	4.6958	4.6826	4.6909
3-carboxy-4-methyl-5-pentyl-2-furanpropanoic acid	267.123	C14H20O5	4.82212	Lipids and lipid-like molecules	2.8241	2.8713	2.705	2.6992	2.6645	2.7382	2.6432	2.4735	2.4837	2.4717	2.4908	2.5588	2.5037	2.4673	2.4634	2.496	2.5208	2.4968	2.6066	2.5811	2.6007	2.6201
(8alpha,10beta,11beta)-3-Hydroxy-4,15-dinor-1(5)-xanthen-12,8-olide	269.139	C13H20O3	4.82212	Organoheterocyclic compounds	2.9351	3.0825	3.0463	3.1781	2.8935	2.9438	3.0447	2.7784	2.8273	2.8958	2.9633	3.0311	2.3769	2.3561	2.3762	2.4511	2.324	2.3293	2.811	2.8028	2.7916	2.8042
Dipropyl hexanedioate	231.158	C12H22O4	4.8299	Lipids and lipid-like molecules	2.7832	2.9816	2.5491	2.8347	2.7102	2.8513	2.7629	2.5029	2.5859	2.3436	2.6963	2.6776	2.8095	2.8622	2.8459	2.7034	2.7738	2.6977	2.6015	2.6539	2.6488	2.6203
5-(4-hydroxy-3-methoxyphenyl)pentanoic acid	223.097	C12H16O4	4.83212	Benzenoids	2.2014	2.2459	1.703	2.0339	2.1529	2.029	1.8882	1.7752	1.6668	1.9182	1.9521	2.1291	1.233	1.4543	1.7623	1.316	1.4138	1.0846	1.7869	1.8759	1.6999	1.8794
4',5-Dihydroxy-7,8-dimethoxyflavone	295.061	C17H14O6	4.83212	Phenylpropanoids and polyketides	2.2059	1.5391	1.7998	1.7458	1.4851	1.9812	1.9227	2.3079	1.9038	1.7557	1.8185	1.8904	0.7724	1.3695	1.5134	0.6493	0.7309	1.6001	1.5516	1.5586	1.6532	1.492
3,4,5-trihydroxy-6-(2-oxo-1,2-diphenylethoxy)oxane-2-carboxylic acid	353.102	C20H20O8	4.83973	Phenylpropanoids and polyketides	3.5636	3.5083	3.5817	3.5493	3.6978	3.6048	3.5965	3.6667	3.5757	3.7399	3.649	3.5789	3.2438	3.2329	3.2875	3.3763	3.1612	3.3064	3.4732	3.4796	3.4594	3.4708
CITROPTEN	207.064	C11H10O4	4.85023	Phenylpropanoids and polyketides	4.0683	3.9893	4.077	4.0854	4.0318	4.0322	4.0472	4.0703	4.0636	4.0521	4.0306	4.1091	4.0224	3.9145	3.8914	3.9943	3.8643	3.959	4.156	4.1721	4.1476	4.1493
Sambacolignoside	967.313	C43H54O22	4.87328	Lignans, neolignans and related compounds	2.8907	2.8533	2.8954	2.9522	3.0729	2.9645	3.0271	3.1875	3.1045	3.1638	3.1129	2.9956	2.8122	2.7107	2.809	2.9344	2.6654	2.6521	2.8763	2.8906	2.9139	2.8416
Quassimarin	559.215	C27H36O11	4.8809	Lipids and lipid-like molecules	3.5703	3.3656	3.4635	3.5344	3.431	3.4535	3.4403	3.5168	3.4293	3.3979	3.4091	3.5184	3.4751	3.3408	3.2674	3.4118	3.1869	3.3509	3.742	3.7353	3.726	3.7193
8-Hydroxynevirapine glucuronide	491.176	C21H22N4O8	4.8809	Organic oxygen compounds	4.1652	4.0944	4.1894	4.1456	4.0835	4.118	4.0559	4.063	4.0853	4.0504	4.0352	4.0704	4.1711	4.1484	4.1369	4.1613	4.0987	4.1217	4.1175	4.1059	4.1132	4.1107
Aquifoliunine EIV	849.281	C42H48N2O18	4.88378	-	2.4588	2.3725	2.3851	2.4396	2.6506	2.5137	2.6803	2.7898	2.6381	2.7334	2.6439	2.6658	2.3404	2.3526	2.354	2.5097	2.0148	2.2019	2.2984	2.4299	2.363	2.4283
3-hydroxytridecanoyl carnitine	418.282	C20H39NO5	4.88378	Lipids and lipid-like molecules	1.5913	2.109	1.9806	2.0409	1.5644	1.7108	1.9385	1.6839	1.7256	1.6916	1.6466	2.0451	1.1815	0.8633	1.086	1.759	1.05	0.6985	1.6704	1.7467	1.6578	1.7125
3alpha-Hydroxyoreadone	251.128	C14H20O4	4.88378	Organoheterocyclic compounds	1.765	1.7654	1.5036	1.5973	1.7338	1.8294	1.7187	1.7418	1.5774	1.7384	1.3543	1.6482	1.5691	1.8784	1.4876	1.6847	1.5894	1.5449	1.5274	1.6577	1.7155	1.7953
Bn-NCC-2	827.294	C40H48N4O13	4.88378	Organoheterocyclic compounds	2.2416	2.1532	2.4022	2.3489	1.8959	1.9734	2.1035	2.4846	2.5788	2.2639	1.9494	2.367	2.8726	2.6403	2.7647	2.7732	2.5992	2.712	2.574	2.6196	2.4504	2.5279
Sorbitan laurate	381.204	C18H34O6	4.89395	Lipids and lipid-like molecules	2.7281	2.7691	2.6024	2.7079	2.7411	2.5734	2.7491	2.4531	2.5299	2.5165	2.6947	2.6783	2.5149	2.6199	2.5138	2.5001	2.6222	2.5984	2.624	2.6179	2.5957	2.5917
3-(a-Naphthoxy)lactic acid	233.08	C13H12O4	4.91223	-	2.6073	2.6524	2.6301	2.5341	2.5337	2.7153	2.6161	2.3897	2.4827	1.8323	2.2086	2.1042	2.2695	2.6533	2.538	2.5589	2.3644	2.6083	2.3849	2.4016	2.3558	2.3531
9-Oxo-nonanoic acid	217.108	C9H16O3	4.93478	Lipids and lipid-like molecules	2.4292	2.3382	2.1759	2.5394	2.2406	2.0172	2.4588	2.081	2.3187	2.2936	2.3695	2.2991	2.3285	2.3095	2.2666	2.4856	2.314	2.3093	2.3337	2.2645	2.4997	2.3681
Corchoionol C 9-glucoside	425.159	C19H30O8	4.96373	Lipids and lipid-like molecules	3.0551	3.0297	2.9819	3.0097	2.9996	3.0839	2.9801	2.9235	3.0335	2.9549	3.0337	3.0183	2.8155	2.8378	2.7623	2.886	2.6665	2.7385	2.9917	2.9601	2.93	2.9196
5-Isopropylbicyclo[3.1.0]hexan-2-one	139.111	C9H14O	4.96373	Organooxygen compounds	2.7443	2.8429	2.6889	2.7408	2.6131	2.8542	2.6702	2.5375	2.5523	2.4886	2.6954	2.504	2.6364	2.7044	2.5767	2.5128	2.6224	2.6051	2.3874	2.4264	2.4629	2.4032
Rosuvastatin 5 S-lactone	971.312	C22H26FN3O5S	4.96528	Organoheterocyclic compounds	2.9106	2.7283	2.9071	2.9435	3.0777	2.9251	3.0328	3.098	2.9666	3.0552	2.9885	3.0668	3.0363	2.8542	2.9371	3.1289	2.9147	3.0232	3.0035	2.9155	2.9733	2.8984
Marmesin rutinoside	618.22	C26H34O13	4.97455	Phenylpropanoids and polyketides	2.4793	2.416	2.2255	2.2993	2.8022	2.5797	2.2745	2.094	2.0989	1.482	2.2893	1.8376	1.0599	1.6928	1.1939	1.1261	1.0876	1.0504	2.1502	2.1385	1.8722	2.1114
(-)-11-Hydroxy-9,15,16-trioxooctadecanoic acid	323.186	C18H30O6	4.99545	Lipids and lipid-like molecules	3.9186	3.9103	3.8688	3.7683	3.7735	3.8468	3.7485	3.7331	3.6703	3.6429	3.6739	3.7205	3.6443	3.7414	3.6771	3.6432	3.8061	3.8245	3.761	3.7576	3.7755	3.7655
Ichangin 4-glucoside	631.243	C32H42O14	4.99545	Lipids and lipid-like molecules	2.8511	2.7213	2.6211	2.4128	2.5679	2.7522	2.5684	2.8645	3.0544	2.8348	2.6555	2.6578	3.3572	3.3243	3.2712	3.2396	3.124	3.1719	3.0156	3.0471	2.9738	2.9605
Dihydrocumambrin A	353.136	C17H24O5	4.99588	Lipids and lipid-like molecules	2.4667	2.5017	2.2297	2.0806	2.2931	2.0702	2.0275	1.8961	1.9917	1.9508	2.0952	1.9618	2.5741	2.6182	2.6007	2.4394	2.5085	2.4412	2.2839	2.2656	2.2371	2.1021
10,11-Dihydro-12R-hydroxy-leukotriene E4	440.248	C23H39NO6S	4.99588	Lipids and lipid-like molecules	2.5104	2.6449	2.4966	2.2172	2.3644	2.7149	2.3944	2.3469	2.5163	2.2088	2.4257	1.9385	2.2576	2.4799	2.3634	1.599	2.5747	2.2204	2.2082	2.1387	2.118	2.0999
DL-2-Aminooctanoic acid	124.111	C8H17NO2	5.00588	Organic acids and derivatives	2.338	2.6185	2.5118	2.6573	2.5688	0.5223	2.5192	2.3905	2.3837	2.187	2.2729	2.3989	2.7746	2.65	2.411	2.868	2.1819	2.6934	2.348	2.2045	2.2246	2.2302
(+)-Abscisic Acid	247.132	C15H20O4	5.02722	Lipids and lipid-like molecules	2.7917	2.983	2.8806	3.005	2.9366	3.0615	2.9371	2.6231	2.8554	2.8969	2.8101	2.9633	2.7314	2.7561	2.9128	2.7573	2.9503	2.8432	2.6668	2.6208	2.6768	2.6582
2,4,4-Trimethylcyclopentanone	109.1	C8H14O	5.03822	Organooxygen compounds	2.7051	2.8813	2.549	2.6731	2.7232	2.7659	2.582	2.459	2.4791	2.3226	2.4964	2.6053	2.7299	2.8323	2.7677	2.7105	2.7295	2.6989	2.4804	2.2961	2.3044	2.3598
Cysteinyl-Hydroxyproline	267.101	C8H14N2O4S	5.03822	Organic acids and derivatives	1.7973	1.3687	0.9103	0.7381	1.437	2.0412	1.3881	1.8563	1.2401	1.0107	1.3089	0.6799	1.5448	1.2513	1.5062	0.6698	0.7077	0.9371	0.8984	1.0862	1.0389	0.9797
Dendrobane A	253.179	C15H24O3	5.03822	-	1.5873	1.9799	2.0779	2.3361	2.8328	2.5873	2.1901	2.0892	1.0309	1.023	1.3106	1.7838	1.5197	2.0898	2.2562	1.4346	1.7835	0.9788	1.8394	1.7274	1.8709	1.8688
Matsutakic acid A	242.138	C10H16O4	5.03822	Organic acids and derivatives	2.2088	2.3974	2.2196	2.5226	1.762	2.3134	2.1776	1.9332	1.9709	1.8458	1.9888	1.6833	2.2808	2.593	2.1754	1.7699	2.3759	2.5075	2.1333	2.0849	2.0931	2.0731
2,2'-(3-methylcyclohexane-1,1-diyl)diacetic acid	213.113	C11H18O4	5.04612	-	3.2649	3.4139	3.0003	3.2248	3.1203	3.1465	3.0953	2.9897	3.0155	2.9279	3.0829	3.1526	3.1435	3.2112	3.1925	3.1387	3.0906	3.0947	3.1599	3.1178	3.1743	3.1163
Myricanene B 5-[arabinosyl-(1->6)-glucoside]	615.247	C32H42O13	5.0766	Phenylpropanoids and polyketides	2.5938	2.5816	2.4282	2.3806	2.1836	2.5886	2.3608	2.5469	2.812	2.5799	2.1864	2.4601	3.3162	3.3204	3.246	3.2705	3.1933	3.2361	2.9187	2.9607	2.9535	2.9634
NONIC ACID	187.097	C9H16O4	5.09728	Lipids and lipid-like molecules	1.8123	2.1575	1.6243	1.9227	1.9637	1.8946	1.8638	1.7079	1.9549	1.603	2.0122	2.1015	1.9241	2.12	2.0386	1.871	1.8914	1.8565	1.9104	1.985	1.9102	1.9992
Eremopetasinorol	253.144	C13H20O2	5.10743	Organooxygen compounds	1.955	1.3983	1.985	1.6219	1.8673	1.2128	2.1167	1.3522	1.2661	1.3846	1.0075	1.8016	1.3847	1.4492	1.8706	1.5645	1.8117	2.2189	1.6255	1.7227	1.5379	1.7725
Isocolumbin	323.127	C20H22O6	5.12438	Organoheterocyclic compounds	1.9917	2.0278	2.1052	2.082	1.8245	1.9132	1.9257	1.9014	2.1865	2.0408	1.9008	2.1142	2.5464	2.4294	2.4401	2.4546	2.3285	2.3519	2.178	2.2117	2.1775	2.195
Dihydroactinidiolide	181.121	C11H16O2	5.13472	Organoheterocyclic compounds	2.6937	2.9111	2.4927	2.6346	2.6018	2.652	2.5	2.2675	2.4603	2.335	2.4767	2.5488	2.4525	2.6618	2.6615	2.5159	2.5873	2.4941	2.3787	2.3049	2.2441	2.3683
12-Oxo-2,3-dinor-10,15-phytodienoic acid	287.16	C16H24O3	5.13472	Lipids and lipid-like molecules	2.7569	2.9546	2.4271	2.662	2.7067	2.7527	2.5568	2.3275	2.5538	2.3732	2.5438	2.5819	2.5893	2.7053	2.6529	2.5297	2.5893	2.5192	2.4744	2.4776	2.4385	2.4755
Eremopetasidione	269.174	C14H20O3	5.13472	Lipids and lipid-like molecules	2.7772	2.935	2.5268	2.7612	2.7196	2.7768	2.744	2.4312	2.6146	2.4656	2.6268	2.7005	2.6546	2.8457	2.8877	2.7069	2.8014	2.7173	2.5493	2.5498	2.5725	2.5007
5-Hydroxyvalproic acid	159.102	C8H16O3	5.22877	Lipids and lipid-like molecules	2.4307	2.107	2.4547	2.3788	2.1163	2.3001	2.3216	2.132	2.0728	1.8801	2.2105	2.3081	2.365	2.4871	2.4525	2.1906	2.2609	2.4248	2.3608	2.4374	2.3442	2.4567
Undecanedioic acid	215.128	C11H20O4	5.26893	Lipids and lipid-like molecules	3.3245	3.3449	3.1336	3.3084	3.1914	3.1996	3.2457	3.0895	3.1085	3.0485	3.0904	3.3213	3.2124	3.2547	3.2967	3.2589	3.2271	3.2973	3.1974	3.2205	3.2313	3.2731
3,4-Dimethyl-5-pentyl-2-furanpropanoic acid	283.155	C14H22O3	5.26893	Lipids and lipid-like molecules	2.7203	2.9193	2.6564	2.6517	2.5686	2.6972	2.6563	2.498	2.4077	2.2982	2.3784	2.5624	2.3557	2.4636	2.4055	2.458	2.4176	2.3671	2.522	2.4891	2.5158	2.4984
Cis-4-Hydroxycyclohexylacetic acid	157.087	C8H14O3	5.26893	Organic oxygen compounds	3.1258	3.2322	2.9833	2.9854	2.9957	3.1654	3.0687	2.997	3.1465	3.0341	3.0307	3.1965	3.1189	3.3373	3.144	3.1987	3.2505	3.1811	3.1431	3.1473	3.1885	3.1723
Dinor-PGE2	325.2	C18H28O5	5.2992	-	4.4551	4.5792	4.2946	4.3275	4.2996	4.4068	4.2474	4.0775	4.1564	4.0578	4.1387	4.1986	4.208	4.3655	4.2543	4.1826	4.3347	4.2998	4.11	4.0885	4.084	4.0854
Cucurbic acid	245.173	C12H20O3	5.30953	Lipids and lipid-like molecules	2.0171	2.1146	1.7371	1.9522	2.0419	1.8999	1.773	1.454	1.7189	1.4773	1.7122	1.8433	1.6787	2.1088	2.0824	1.9558	2.0064	1.8449	1.3259	1.2826	1.1354	1.3116
Tolmetin glucuronide	475.175	C21H23NO9	5.30953	Organic oxygen compounds	2.6873	2.4841	2.5002	2.4625	2.5238	2.5852	2.4426	2.7476	2.591	2.5742	2.4743	2.5197	2.6137	2.6266	2.6033	2.6303	2.4947	2.5474	2.6968	2.6755	2.6789	2.7092
7-beta-Hydroxy-delta-9-THC	351.194	C21H30O3	5.30993	Organoheterocyclic compounds	2.4912	2.0171	2.6289	2.4315	2.3782	2.4566	2.4376	2.2287	2.1363	2.1941	2.3537	2.2885	2.3775	2.3033	2.2873	2.1935	2.1537	2.3747	2.3243	2.3476	2.3986	2.3781
5-Taurinomethyl-2-thiouridine	378.046	C12H19N3O8S2	5.34042	Nucleosides, nucleotides, and analogues	0.0887	0.0843	0.6913	0.2592	0.5302	0.0019	0.5058	2.2376	0.2488	0.6055	0.3649	2.8432	0.0016	1.0615	0.0105	0.0086	3.7345	0.0017	2.2306	2.1485	2.2053	2.1239
Isorhamnetin	315.05	C16H12O7	5.34042	Phenylpropanoids and polyketides	1.6488	1.488	1.6713	1.391	2.0525	2.0204	2.0956	2.9763	2.1375	2.1694	2.1072	3.5556	1.6608	2.4249	1.2953	0.8125	4.3754	1.6584	3.0071	2.9931	2.9806	2.9869
Cis-5-Octenoic acid	143.106	C8H14O2	5.3537	Lipids and lipid-like molecules	1.9843	1.9964	1.9546	1.8446	1.9163	1.921	1.8849	1.6626	1.868	1.6985	1.8726	1.8645	1.9073	2.0073	1.9817	1.9031	1.95	1.8945	1.5922	1.5259	1.6476	1.5334
4-Demethylsimmondsin 2'-(E)-ferulate	579.218	C25H31NO12	5.3537	Phenylpropanoids and polyketides	3.0764	2.7693	3.1597	3.0706	2.8015	2.9311	2.6643	3.0219	2.7142	2.7962	2.723	2.9417	3.1091	2.9082	2.8445	3.0091	2.836	2.9384	3.4342	3.4123	3.4361	3.4606
(1'R)-Nepetalic acid	183.102	C10H16O3	5.37158	Lipids and lipid-like molecules	1.7831	1.9866	1.9873	1.8867	1.9809	2.1216	1.9249	1.688	1.6038	1.5144	2.0448	1.7867	1.6778	1.6248	1.8353	1.6439	1.687	1.3668	1.9076	1.8791	1.9143	1.9407
3-Hydroxy-6,8-dimethoxy-7(11)-eremophilen-12,8-olide	309.171	C17H26O5	5.38175	Lipids and lipid-like molecules	2.0568	1.9874	1.8697	1.9113	1.9885	1.8411	1.8268	1.7123	1.6844	1.4435	1.4895	1.704	1.3552	1.5533	1.2973	1.519	1.5142	1.4791	1.8407	1.8625	1.8001	1.7975
Hydroxyprolyl-Methionine	299.047	C10H18N2O4S	5.41425	Organic acids and derivatives	1.6234	0.9293	1.7227	1.5721	1.8475	1.7888	1.8286	2.155	2.0385	2.3704	1.9167	2.2492	1.4812	0.7969	1.2999	1.9267	2.948	1.4175	1.7647	1.5037	1.6318	1.6706
5-Methyldeoxycytidine	521.18	C10H15N3O4	5.41903	Nucleosides, nucleotides, and analogues	4.0333	3.7756	4.1873	4.0767	3.5405	3.8457	3.4471	3.8583	3.6459	3.5277	3.4686	3.8137	4.7076	4.3861	4.2018	4.4111	4.38	4.406	4.6949	4.6739	4.6928	4.706
Methyl nomilinate 17-glucoside	763.266	C35H50O16	5.45175	Lipids and lipid-like molecules	2.6484	2.4639	2.645	2.554	2.4086	2.4102	2.4672	2.6179	2.7477	2.6336	2.3477	2.495	3.2432	3.1145	3.0531	3.1336	3.1174	3.1569	2.872	2.8776	2.8695	2.8346
Traumatic Acid	227.128	C12H20O4	5.47258	Lipids and lipid-like molecules	3.2396	3.0533	3.0086	3.2024	3.1058	2.9882	3.1441	3.2006	2.8752	2.8335	2.8749	3.1166	3.0517	3.0187	3.0612	2.9938	2.9532	2.9289	3.0375	3.0399	2.9896	3.0416
Tejedine	705.224	C38H40N2O9	5.47258	Organoheterocyclic compounds	3.0463	2.8936	3.0681	3.0619	2.8468	2.915	3.0711	3.2239	3.3569	3.1608	2.9903	3.1446	3.7576	3.7011	3.7753	3.7123	3.7517	3.8093	3.36	3.3598	3.3594	3.3398
7S,8S-DiHOTrE	311.221	C18H30O4	5.51837	-	4.1243	4.147	4.0271	4.042	3.9649	4.0301	4.0466	3.7298	3.8084	3.7606	3.936	3.9245	3.9504	4.0319	4.0322	3.8791	4.0791	4.1164	3.7551	3.7527	3.7269	3.7378
Licorice glycoside E	738.209	C35H35NO14	5.52375	Phenylpropanoids and polyketides	3.6647	3.5475	3.8664	3.6814	3.4602	3.5353	3.5405	3.5621	3.7715	3.5969	3.448	3.6032	4.0275	3.8796	4.0239	3.9982	3.949	4.001	3.7967	3.8009	3.7719	3.7544
Caryophyllene epoxide	221.189	C15H24O	5.56268	Lipids and lipid-like molecules	0.7899	1.5434	2.8816	0.7738	1.7855	0.8111	0.7143	0.6819	0.689	0.651	1.1277	0.7145	2.0404	1.9782	2.0057	1.9556	2.264	2.0176	1.7397	1.7076	1.7138	1.6605
2,6-Dihydroxynaphthalene	193.085	C10H8O2	5.5732	-	2.9136	2.8558	2.8049	2.7201	2.6745	2.8505	2.594	2.7615	2.9267	2.7108	2.5092	2.704	3.3002	3.3735	3.2133	3.2476	3.1829	3.2627	3.1106	3.0811	3.1114	3.0745
S-Adenosylhomocysteine	367.117	C14H20N6O5S	5.60735	Nucleosides, nucleotides, and analogues	4.0607	3.8755	4.1213	4.0628	3.9579	4.1541	3.6807	4.0586	3.7184	3.8845	3.8636	3.8985	4.2548	3.7155	3.6295	3.8894	3.7275	3.9567	4.7872	4.7724	4.7898	4.7782
(S)-(-)-Perillyl alcohol	135.116	C10H16O	5.68352	Lipids and lipid-like molecules	2.1994	2.3354	2.3191	2.3525	2.2731	2.3952	2.2714	2.1199	2.1363	1.9558	2.1147	2.1604	2.2713	2.3497	2.3213	2.3143	2.3115	2.3313	1.7476	1.5958	1.6693	1.6365
Bilirubin glucuronide	781.276	C39H44N4O12	5.74457	Organoheterocyclic compounds	2.5005	2.0847	2.5925	2.2221	1.985	2.1904	2.0827	2.588	2.8608	2.5854	2.066	2.1937	3.2496	3.2133	3.1912	3.1547	3.1468	3.2056	2.8514	2.8458	2.8446	2.8966
Kinetensin 1-3	403.233	C15H30N6O4	5.74457	-	1.5399	1.6102	1.0354	1.605	1.4979	1.087	1.1092	1.0147	1.7433	0.9644	1.8603	1.8797	1.7127	2.2514	1.8579	1.6901	1.8663	1.6694	1.7425	1.5349	1.5236	1.7066
Zeranol	321.171	C18H26O5	5.75523	Phenylpropanoids and polyketides	3.0745	3.0224	2.9878	2.851	2.8851	3.0447	2.8446	2.8644	2.8237	2.755	2.7665	2.8242	2.8488	2.9084	2.8388	2.9025	2.9862	2.9857	2.9059	2.9434	2.9698	2.9765
Dodecanedioic acid	229.144	C12H22O4	5.76523	Lipids and lipid-like molecules	2.9612	2.8409	2.8095	2.8748	2.7722	2.8513	2.8382	2.7737	2.645	2.7885	2.7772	2.8629	2.7579	2.8288	2.9065	2.8119	2.8363	2.8241	2.8078	2.8585	2.9244	2.8622
19-Hydroxycinnzeylanol 19-glucoside	597.237	C26H42O13	5.77573	Lipids and lipid-like molecules	1.4935	0.9947	0.9722	1.0027	2.503	1.7305	2.1333	2.4193	2.4556	2.5037	2.0326	1.6838	1.6392	1.5618	1.7395	1.9942	1.7157	2.0029	1.9171	2.0627	2.0137	2.0455
Hexylresorcinol	239.128	C12H18O2	5.7859	Benzenoids	2.6976	2.7728	2.5429	2.5956	2.4185	2.6342	2.5679	2.3895	2.267	2.4456	2.4051	2.5373	2.4277	2.4437	2.4065	2.5678	2.5774	2.4485	2.5125	2.5361	2.5931	2.6434
Corchorifatty acid D	353.197	C18H28O4	5.80673	Lipids and lipid-like molecules	2.6201	2.5093	2.6268	2.4746	2.5094	2.5499	2.5208	2.4311	2.3698	2.3472	2.3589	2.3799	2.379	2.4832	2.4235	2.3343	2.5974	2.4718	2.4521	2.4903	2.4799	2.4994
Lubiminol	277.179	C15H26O3	5.83883	Lipids and lipid-like molecules	2.7761	2.5363	2.9075	2.6889	2.7076	2.6474	2.6522	2.4094	2.3806	2.3497	2.4091	2.5646	2.5541	2.7069	2.681	2.5777	2.7974	2.7539	2.4328	2.4506	2.4073	2.4023
Curdione	237.184	C15H24O2	5.861	Lipids and lipid-like molecules	2.3136	2.4572	2.9405	2.8416	3.0454	2.7103	2.9896	2.5554	1.7544	2.1264	1.9669	2.48	2.491	2.5074	2.727	2.3851	2.7336	2.4334	2.3374	2.3911	2.3846	2.3684
Glyceryl 5-hydroxydecanoate	285.169	C13H26O5	5.87267	Lipids and lipid-like molecules	2.7796	2.9636	2.7462	2.7704	2.7107	2.8663	2.6603	2.543	2.8156	2.5709	2.7684	2.7624	2.7688	2.9862	2.8103	2.7509	2.8593	2.8219	2.5838	2.5227	2.5614	2.5424
Chavicol	135.079	C9H10O	5.9055	Benzenoids	2.8419	2.9913	2.9579	2.9581	3.0569	2.9543	2.9209	3.0197	2.9697	2.9254	2.9862	2.9608	3.3181	2.9457	2.9853	2.8606	2.8435	2.9667	2.9689	2.9596	3.0254	2.986
Nigellic acid	279.123	C15H20O5	5.90905	Lipids and lipid-like molecules	2.3317	2.4046	2.1492	2.1746	2.3224	2.3166	2.2294	2.0646	2.0931	2	2.1554	2.1592	1.9702	2.1077	2.0096	2.0788	2.0293	2.0526	2.1045	2.0665	2.1251	2.1424
Trolox	251.125	C14H18O4	5.939	Organoheterocyclic compounds	2.4046	2.158	2.148	2.3427	2.2918	2.5565	2.3479	2.3975	2.1586	2.1984	2.1585	2.3219	2.1278	2.2088	2.3847	2.2469	2.1116	2.1696	1.8828	1.9537	1.869	1.8872
8-Hydroxy-4(6)-lactarene-5,14-diol	299.186	C15H26O3	5.95072	Organooxygen compounds	3.0854	2.8574	3.125	3.0894	3.3179	3.1818	3.1351	2.9534	2.9492	2.9903	3.1419	3.0796	3.2733	3.2044	3.2099	3.0857	3.2025	3.3196	3.078	3.0991	3.0834	3.1038
2-Methoxy-4-(4-methyl-1,3-dioxolan-2-yl)phenol	211.095	C11H14O4	5.96117	Benzenoids	1.4313	1.6883	1.5572	1.3687	1.7805	1.7466	1.529	1.8868	2.1417	2.0188	1.3872	1.7262	2.2403	2.2309	2.1765	2.3322	1.9826	2.2806	2.3011	2.1995	2.2063	2.2591
(3b,20R,22R)-3,20,27-Trihydroxy-1-oxowitha-5,24-dienolide 3-glucoside	599.326	C34H50O11	6.016	Lipids and lipid-like molecules	3.1783	3.2962	3.0999	3.2031	3.1366	3.1678	2.9372	2.6937	2.9503	2.6368	2.9773	3.082	2.7921	3.2181	3.1536	2.9351	3.1359	3.078	2.6347	2.6433	2.5754	2.5431
Guaidiol	283.191	C15H26O2	6.02405	Lipids and lipid-like molecules	2.9552	2.7822	3.2841	2.9698	3.09	3.0415	3.0789	2.8893	2.8892	2.9754	2.9935	2.936	3.1619	2.9498	3.2053	3.0299	3.1377	3.2852	2.9733	2.9874	2.9695	2.9819
(1(10)E,4a,5E)-1(10),5-Germacradiene-12-acetoxy-4,11-diol	295.191	C17H28O4	6.04505	Lipids and lipid-like molecules	3.4352	3.1312	3.4273	3.3547	3.3191	3.3102	3.4056	3.2465	3.2343	3.212	3.2603	3.361	3.296	3.318	3.3279	3.3135	3.4191	3.4261	3.3367	3.3673	3.3367	3.3428
Capsianoside V	559.277	C26H42O10	6.06638	Lipids and lipid-like molecules	1.6858	1.4597	1.568	1.7862	1.3632	1.7372	1.5504	2.096	1.4827	1.3928	1.8965	1.4779	1.917	2.262	1.7376	1.8448	3.2607	1.933	1.8811	1.9348	1.8831	2.1071
Theasapogenol A	507.367	C30H50O6	6.07133	Lipids and lipid-like molecules	3.4741	3.7035	3.1101	3.2916	3.1486	3.3502	3.1937	2.8108	3.0201	2.7508	3.0273	3.2042	3.3235	3.531	3.2652	3.2596	3.3105	3.3263	3.155	3.1273	3.132	3.1372
Tanacetol B	341.197	C17H28O4	6.11988	Lipids and lipid-like molecules	3.5639	3.6697	3.3952	3.5138	3.4574	3.5508	3.4667	3.2989	3.3912	3.2536	3.4068	3.4614	3.4761	3.619	3.572	3.5227	3.5359	3.5327	3.4852	3.5068	3.4907	3.4974
Glutaminylarginine	301.166	C11H22N6O4	6.19503	Organic acids and derivatives	2.4959	2.5294	2.4178	2.5828	2.4624	2.4489	2.4223	2.3003	2.3478	2.2941	2.4874	2.4886	2.6074	2.6474	2.7581	2.5927	2.6208	2.5358	2.4938	2.5228	2.518	2.5386
C16 Sphinganine	274.273	C16H35NO2	6.20115	-	4.3067	4.4227	4.4246	4.3595	4.5389	3.5165	4.3742	4.5372	4.1953	4.4477	4.4091	4.4231	4.1514	4.2	4.2916	4.1997	4.0201	4.0462	4.4094	4.3956	4.4118	4.3779
Ethyl (2E,6Z)-dodecadienoate	269.175	C14H24O2	6.21153	Lipids and lipid-like molecules	1.004	0.8483	1.8079	1.7843	1.8004	1.7342	1.2771	1.7394	1.6868	1.73	1.8075	1.6549	1.7112	1.6314	1.5865	1.4717	1.5597	1.6375	1.6593	1.6503	1.7592	1.8192
3-hydroxyoctanoyl carnitine	284.189	C15H29NO5	6.21153	Lipids and lipid-like molecules	1.3319	1.5646	1.6702	1.9538	1.7161	1.8844	1.5208	1.6645	1.7686	1.7149	1.7007	1.9269	1.9933	2.0418	1.8832	1.6093	2.0334	1.9745	1.7613	1.8987	1.8241	1.9109
12-oxo-14,18-dihydroxy-9Z,13E,15Z-octadecatrienoic acid	325.2	C18H28O5	6.21248	-	4.3076	4.4002	4.1916	4.2102	4.1656	4.2894	4.1341	3.9498	4.0286	3.944	4.0053	4.1123	4.131	4.2552	4.1435	4.1088	4.1674	4.2016	4.0802	4.0733	4.0717	4.0663
1,11-Undecanedicarboxylic acid	243.16	C13H24O4	6.2327	Lipids and lipid-like molecules	2.9565	2.8938	2.8374	3.0836	2.866	2.9508	3.1515	3.0066	2.7934	2.917	2.9179	3.0704	3.1262	3.1956	3.2089	3.1448	3.2039	3.2146	3.0265	3.0602	3.0352	3.03
9S-hydroxy-11,15-dioxo-5Z,13E-prostadienoic acid	395.206	C20H30O5	6.2327	Lipids and lipid-like molecules	3.0305	2.9583	2.9447	3.0217	2.9953	3.0194	2.9936	2.997	3.0169	2.9473	3.0217	3.0638	2.894	2.9416	2.9225	3.0356	2.8704	2.95	2.9643	2.9782	2.9824	2.9857
Corchorifatty acid F	327.218	C18H32O5	6.24303	Lipids and lipid-like molecules	4.5903	4.6114	4.5236	4.5584	4.4745	4.5366	4.5117	4.3601	4.4527	4.3819	4.4783	4.5433	4.4773	4.5702	4.5055	4.5127	4.5374	4.555	4.5011	4.5246	4.507	4.5003
Prostaglandin F3a	385.256	C20H32O5	6.25065	Lipids and lipid-like molecules	3.2874	3.426	3.157	3.2635	3.144	3.3537	3.0721	2.8916	3.2122	3.0278	3.1761	3.1904	3.2965	3.447	3.2376	3.2143	3.3575	3.3245	3.1291	3.1264	3.1344	3.1309
C16 Sphingosine	272.257	C16H33NO2	6.27232	-	1.1622	1.7346	1.5554	1.6642	1.6846	0.9139	1.381	1.7964	1.5107	1.8011	1.7214	1.6883	0.8097	0.8731	1.219	0.8022	0.878	0.808	1.67	1.5398	1.6602	1.5456
Cinncassiol D1 glucoside	559.279	C26H42O10	6.31203	Lipids and lipid-like molecules	2.0751	2.4173	2.7451	3.2022	2.1966	2.6276	2.4434	1.4983	0.1395	0.8318	0.0164	1.7065	0.0162	0.302	0.017	1.7415	2.2134	0.5536	2.3544	2.3123	2.23	2.2849
2,6,10,10-Tetramethyl-1-oxaspiro[4.5]decan-6-ol	235.166	C13H24O2	6.31565	Organoheterocyclic compounds	2.9546	2.8521	2.974	2.7586	2.8318	2.96	2.745	2.6779	2.6509	2.6291	2.665	2.7413	2.6705	2.7487	2.6194	2.6662	2.9351	2.7565	2.6861	2.6769	2.7012	2.6514
2-Phenylethyl beta-D-glucopyranoside	267.122	C14H20O6	6.32582	Organic oxygen compounds	3.1465	3.0408	2.9538	2.6955	2.8609	2.6921	3.0478	2.7187	2.7273	2.7742	2.7858	2.871	2.6961	2.7842	2.9594	2.8938	2.671	2.8102	2.7505	2.7772	2.7859	2.754
Mammea B/BC cyclo E	790.38	C21H26O6	6.32582	Phenylpropanoids and polyketides	4.1498	4.0829	3.9984	3.5728	3.9	0.9149	4.1242	3.718	3.6827	3.7898	3.7469	3.8717	3.6745	3.6533	4.0061	3.8937	3.5743	3.7367	3.7131	3.6793	3.7104	3.6914
1-Acetoxy-2-hydroxy-16-heptadecen-4-one	371.243	C19H34O4	6.33287	Lipids and lipid-like molecules	2.1977	1.571	1.441	1.747	2.0719	1.5143	1.4121	1.7316	1.15	0.8078	1.8267	1.9179	0.0036	2.1828	1.3659	2.1061	1.0813	2.1231	1.9471	1.7325	1.9113	1.8424
Ipomeatetrahydrofuran	301.202	C15H28O3	6.33287	Lipids and lipid-like molecules	1.5716	1.7848	1.1531	1.9043	1.7349	1.7042	0.9317	1.1459	1.6492	1.2836	1.9242	1.6822	1.9573	1.963	2.0577	1.8858	1.8578	1.759	1.789	1.9127	1.7515	1.9143
13,14-Dihydro PGF-1a	357.264	C20H38O5	6.38003	Lipids and lipid-like molecules	3.3576	3.4269	3.1035	3.2756	3.1355	3.1945	3.2345	3.0211	3.1155	3.0621	3.1618	3.2582	3.1873	3.264	3.2055	3.1849	3.2142	3.2492	3.2398	3.2434	3.2373	3.2421
Dehydrocurdione	267.194	C15H22O2	6.4233	Lipids and lipid-like molecules	2.6763	2.4021	2.8909	2.5821	2.6509	2.697	2.6118	2.3723	2.4267	2.3802	2.5029	2.4732	2.7472	2.6188	2.7872	2.552	2.8012	2.8671	2.489	2.5068	2.4515	2.497
(1R,2R)-3-oxo-2-pentyl-cyclopentanehexanoic acid	269.209	C16H28O3	6.44513	-	2.4633	2.3952	2.2579	2.3373	2.3303	2.3632	2.1871	1.9598	2.1965	2.0111	2.2147	2.3198	2.3016	2.4841	2.3218	2.1823	2.2843	2.2023	2.1714	2.2121	2.1198	2.142
(Z)-3-Oxo-2-(2-pentenyl)-1-cyclopenteneacetic acid	191.105	C12H16O3	6.45547	Organic oxygen compounds	1.8656	1.7479	1.7833	1.844	1.7681	1.8038	1.6869	1.8051	1.7013	1.6713	1.7189	1.7157	1.8816	1.5965	1.6627	1.6353	1.5724	1.5978	2.0577	2.0709	2.0698	2.0187
LysoPE(0:0/20:2(11Z,14Z))	506.328	C25H48NO7P	6.45547	Lipids and lipid-like molecules	3.2609	3.2886	3.1743	3.1697	3.1907	3.209	3.1634	3.0533	3.0391	3.0768	3.0407	3.1162	3.0898	3.1562	3.1418	3.1136	3.0854	3.1205	3.0733	3.087	3.0907	3.0707
Capsidiol	281.175	C15H24O2	6.47435	Lipids and lipid-like molecules	2.054	1.7881	2.0743	2.0919	2.0535	2.1324	2.1105	1.9205	2.0484	1.8881	2.0602	2.0168	2.284	2.2321	2.222	2.1799	2.1883	2.2816	1.9776	2.1561	2.079	2.1259
Vinaginsenoside R12	695.431	C36H64O11	6.48897	Lipids and lipid-like molecules	2.787	3.0361	2.5294	2.5649	2.5465	2.7149	2.4957	2.1394	2.473	1.9584	2.2609	2.4556	2.5883	2.6531	2.5591	2.5017	2.5806	2.5571	2.3766	2.4371	2.4368	2.4521
Sterebin E	383.243	C20H34O4	6.49553	Lipids and lipid-like molecules	1.8838	1.7525	1.8448	2.1076	1.9375	1.971	1.9211	1.9328	1.904	1.8754	1.8789	1.8541	1.2921	1.7255	1.5904	1.3277	1.6388	1.655	1.7372	1.7996	1.6859	1.7888
Cibaric acid	305.176	C18H28O5	6.49553	Lipids and lipid-like molecules	2.3479	2.4424	2.2178	2.2969	2.3095	2.6575	2.4475	2.3972	2.3523	2.4216	2.1966	2.3562	2.4103	2.5495	2.3229	2.4227	2.5313	2.4923	2.3817	2.3311	2.4567	2.4032
Furanofukinin	293.176	C16H24O2	6.51668	Lipids and lipid-like molecules	2.5276	2.3409	2.507	2.5486	2.9321	2.6243	2.9647	2.7396	2.7493	2.9051	2.6052	2.8375	2.6013	2.3848	2.4294	2.713	2.4847	2.4748	2.5931	2.6186	2.6408	2.6639
2,3-dinor Prostaglandin E1	349.198	C18H30O5	6.52097	-	4.6793	4.7664	4.4524	4.4815	4.4565	4.5206	4.4081	4.1976	4.2952	4.169	4.3463	4.3969	4.4479	4.584	4.4814	4.4031	4.4957	4.4782	4.4051	4.3974	4.3764	4.3855
C17 Sphinganine	288.289	C17H37NO2	6.54263	-	2.1668	2.448	2.6382	2.4167	2.576	2.1354	2.5943	3.2232	3.1426	2.3955	2.712	2.7719	2.6758	2.0826	2.0248	2.4374	2.1692	1.8021	2.9558	2.9275	2.8784	2.898
Prostaglandin F1a	355.248	C20H36O5	6.57118	Lipids and lipid-like molecules	2.4352	2.3859	2.1716	2.3046	2.2174	2.2551	2.2842	2.1401	2.1826	2.0479	2.2175	2.4153	2.3216	2.3502	2.1881	2.3347	2.3996	2.5019	2.3236	2.3525	2.3121	2.3236
4-(1,1,3,3-Tetramethylbutyl)-phenol	251.165	C14H22O	6.58135	Benzenoids	2.1478	2.0016	1.7209	1.9623	2.0999	2.1439	2.2056	2.2618	1.832	1.9975	1.6749	2.1228	1.9086	2.0158	2.0342	2.1379	1.9485	2.077	1.988	1.9737	2.061	1.9623
PS(14:0/22:6(4Z,7Z,10Z,13Z,16Z,19Z))	760.457	C42H70NO10P	6.59268	Lipids and lipid-like molecules	1.9079	2.0361	1.558	1.8376	2.066	1.829	1.8749	1.927	1.9342	1.5606	1.9137	1.8501	2.0279	2.264	1.8021	2.0788	2.2313	1.9827	1.8987	1.9526	2.0247	1.8113
Crispane	353.266	C20H32O3	6.59763	Lipids and lipid-like molecules	2.1976	1.9548	2.0254	2.1801	1.8356	1.8089	1.8911	1.845	1.6469	1.854	1.9135	2.0129	2.0171	2.191	1.8794	2.0244	2.0152	1.9417	2.0094	2.002	1.9206	2.0114
4-ene-Valproic acid	187.097	C8H14O2	6.62435	Lipids and lipid-like molecules	2.3206	2.5152	2.0951	2.3125	2.2704	2.2487	2.0989	2.0162	2.2864	2.0456	2.2336	2.3373	2.2898	2.3675	2.4704	2.2902	2.2782	2.2994	2.2855	2.3156	2.2708	2.1916
Tetradecanedioic acid	257.175	C14H26O4	6.66768	Lipids and lipid-like molecules	2.2154	2.0758	2.2819	2.3567	2.2176	2.2105	2.5582	2.2354	2.1851	2.3584	2.4447	2.486	2.5622	2.4712	2.6203	2.5508	2.652	2.5795	2.5497	2.4586	2.5915	2.4369
(25S)-Spirostane-3b,5b,6a-triol 3-[4''-rhamnosylglucoside]	755.426	C39H64O14	6.67835	Lipids and lipid-like molecules	2.2058	2.5362	2.0676	2.4239	2.2919	2.2703	2.0037	2.129	2.2907	1.939	2.1418	2.3503	2.308	2.4944	2.2834	2.3738	2.1296	2.3421	2.3216	2.3317	2.1807	2.0781
7(14)-Bisabolene-2,3,10,11-tetrol	255.194	C15H28O4	6.68397	Lipids and lipid-like molecules	2.0063	2.3062	1.8376	2.0171	1.9478	2.0552	1.9936	1.7366	1.8718	1.5024	1.7897	2.0953	1.9428	2.2072	1.9129	1.9687	1.7894	1.7616	1.9082	1.9963	1.7882	1.7864
Hydroxydestruxin B	592.369	C30H51N5O8	6.68397	Organic acids and derivatives	2.999	2.7552	2.915	3.0291	2.8727	2.7182	2.8444	2.7696	2.8123	2.4367	2.8732	2.9365	2.9516	3.0653	2.7225	2.9883	2.4055	2.5205	2.9606	2.9845	3.0202	2.885
13(S)-HpOTrE	293.21	C18H30O4	6.70545	-	4.8427	4.8314	4.7912	4.7389	4.7046	4.7545	4.627	4.477	4.5149	4.475	4.5721	4.6228	4.6637	4.7207	4.6271	4.6378	4.6783	4.74	4.6448	4.6102	4.6218	4.6144
1-hexadecylpyridinium	304.299	C21H37N	6.70545	-	3.4446	3.4712	3.4579	3.4383	3.4905	3.4914	3.1818	3.3072	3.2564	3.3294	3.3099	3.1827	3.186	3.1884	3.2046	3.1739	3.0981	3.1094	3.5292	3.421	3.4095	3.3733
()9-HpODE	311.223	C18H32O4	6.71587	-	5.2712	5.1448	5.303	5.2245	5.2888	5.2461	5.2476	5.2115	5.1617	5.2345	5.2715	5.2345	5.2453	5.2118	5.2223	5.2463	5.3336	5.3449	5.2201	5.2545	5.203	5.1918
Xi-7-Hydroxyhexadecanedioic acid	325.2	C16H30O5	6.75828	Lipids and lipid-like molecules	3.3623	3.4959	3.1701	3.2989	3.2631	3.344	3.172	2.9632	3.1406	3.0053	3.1289	3.1884	3.274	3.3582	3.315	3.2921	3.2112	3.1878	3.1953	3.1931	3.1756	3.1668
1,1,4,8-tetramethyl-cis,cis,4,7,10-cycloundecatriene	205.194	C15H24	6.76928	-	1.6942	1.6817	1.4454	1.4747	2.0881	1.6197	1.8704	1.6831	1.8095	1.5304	1.5039	1.8298	2.2795	1.9317	2.2875	1.675	2.3347	1.4728	1.9549	1.9389	1.9291	1.949
()12,13-DiHOME	313.237	C18H34O4	6.82933	-	3.8495	3.9121	3.5375	3.733	3.5987	3.6989	3.645	3.5205	3.5703	3.47	3.5743	3.6719	3.6383	3.7706	3.6137	3.7344	3.7028	3.6715	3.6788	3.6893	3.7046	3.6795
Centellasapogenol A	533.348	C30H48O5	6.82933	Lipids and lipid-like molecules	3.2215	3.2766	3.5592	3.4686	3.3546	3.3194	3.3956	3.3188	3.3838	3.5004	3.3198	3.4083	2.596	2.7078	2.689	2.5656	2.7112	2.76	3.0739	3.0918	3.0631	3.0777
Ethylparaben	167.069	C9H10O3	6.83428	Benzenoids	3.1951	3.1705	3.3187	3.2871	3.0464	3.1667	2.9962	3.2679	3.0627	3.0512	3.0549	3.1657	3.1375	3.1699	2.9423	3.0912	2.8966	3.0357	3.7863	3.7782	3.7457	3.7439
Butyl salicylate	195.1	C11H14O3	6.83428	Benzenoids	3.5453	3.4523	3.6227	3.5681	3.3709	3.49	3.3117	3.5935	3.3722	3.392	3.3655	3.4659	3.4691	3.4562	3.2619	3.4247	3.2521	3.2698	4.0963	4.1022	4.0659	4.0718
8-oxo-9,11-octadecadiynoic acid	291.195	C18H26O3	6.85087	-	4.2497	4.2609	4.0681	4.1065	4.0043	4.1063	3.9811	3.8197	3.8967	3.7668	3.8533	3.999	3.9668	4.0746	3.9228	4.0327	3.8948	3.9739	4.0816	4.0608	4.0437	4.0381
Trans-EKODE-(E)-Ib	309.207	C18H30O4	6.87117	-	3.9963	3.9589	3.8897	3.9398	3.8679	3.9495	3.9624	3.8488	3.8702	3.8196	3.8717	3.9809	3.8923	3.9924	3.8742	3.9142	3.9231	3.9671	3.9116	3.9096	3.9182	3.9106
Glycerophosphocholine	278.077	C8H20NO6P	6.87117	Lipids and lipid-like molecules	1.9486	1.9792	1.3982	0.8639	1.7055	0.8834	1.5741	0.9695	1.3303	0.7683	2.03	0.8542	1.351	1.7035	1.9504	1.5666	1.8738	1.1595	1.6724	1.5102	1.6145	1.5835
1-Hydroxypropan-2-yl 2-isopropyl-5-methylcyclohexyl carbonate	303.181	C14H26O4	6.87117	Lipids and lipid-like molecules	1.8145	1.9667	1.7311	1.9129	1.7647	1.8368	1.8566	1.5971	1.7588	1.647	1.8995	1.9027	1.9817	2.0834	2.0963	1.8801	1.9846	1.8839	1.8329	1.927	1.8922	1.9343
Oxacyclotetradecan-2-one	257.175	C13H24O2	6.88133	Phenylpropanoids and polyketides	1.5309	2.1387	1.5559	1.809	1.6448	1.8773	1.7473	1.5076	2.0624	1.5991	1.975	2.1521	2.2638	2.4427	2.0115	2.3135	2.2863	2.0401	1.9289	1.9947	2.0773	2.0033
Epioxylubimin	275.161	C15H24O3	6.93562	Lipids and lipid-like molecules	2.138	2.1481	1.9017	2.0628	2.082	2.2602	2.1846	2.0035	1.7404	1.867	1.7383	2.0706	1.787	2.0692	2.1912	1.9022	2.0042	1.76	1.9719	1.9433	1.8869	1.8655
Debenzoylzucchini factor B	598.363	C37H53NO3	6.93562	Lipids and lipid-like molecules	2.6549	2.8415	2.5615	2.821	2.6875	2.7327	2.4334	2.3503	2.5369	2.3087	2.5507	2.6253	2.6754	2.858	2.6318	2.5973	2.5638	2.443	2.6549	2.7391	2.6372	2.6783
12-OPDA	291.196	C18H28O3	6.96483	-	3.3707	3.2546	3.4153	3.3044	3.3591	3.1718	3.2633	3.0323	3.1881	3.1378	3.1149	3.3924	3.2991	3.0495	3.3891	3.2888	3.3368	3.4365	3.3318	3.294	3.3059	3.3588
9,10-epoxy-13-hydroxy-11-octadecenoic acid	313.236	C18H32O4	6.97927	-	4.2609	4.3414	4.0478	4.128	4.0327	4.1766	4.0463	3.8662	3.926	3.8084	3.9388	4.065	4.063	4.2303	3.9966	4.1041	4.0567	4.0831	4.0614	4.0396	4.0252	4.0261
2-Hydroxyundecanoate	201.149	C11H22O3	6.98533	Lipids and lipid-like molecules	1.5041	1.1037	1.8184	0.9335	1.2313	1.0908	1.5362	1.8521	0.8739	0.8354	0.8956	1.4905	1.001	1.5869	0.9103	1.0346	1.3517	1.4512	1.2918	1.343	1.3472	1.2499
13,14-Dihydro-15-keto-PGE2	397.223	C20H32O5	7.01667	Lipids and lipid-like molecules	2.7956	2.8376	2.7222	2.7338	2.6575	2.7913	2.7747	2.7069	2.5851	2.6291	2.6474	2.7742	2.5365	2.4789	2.5656	2.5065	2.6084	2.5854	2.6781	2.7178	2.7537	2.7051
Latanoprost	477.286	C26H40O5	7.01667	Lipids and lipid-like molecules	2.0769	2.6838	1.9713	1.7903	2.0824	1.9967	1.9609	1.3637	1.1911	0.8276	1.3947	0.9156	2.1791	2.4967	2.0806	1.555	2.047	2.1828	2.1516	2.2178	2.1959	1.9989
13,14-dihydro-15-keto-PGE1	353.233	C20H34O5	7.01667	-	2.5002	2.5133	2.6164	2.5179	2.4457	2.4226	2.5786	2.374	2.2478	2.2549	2.3167	2.5391	2.2938	2.2714	2.1303	2.1723	2.2663	2.246	2.4438	2.483	2.4864	2.3614
3-Methyl-5-pentyl-2-furanheptanoic acid	279.196	C17H28O3	7.02682	Lipids and lipid-like molecules	3.0174	2.3479	3.0295	2.7635	2.8741	2.7574	2.8575	2.8358	2.61	2.7262	2.6454	2.7586	2.6617	2.894	2.6397	3.0386	3.0427	2.8283	2.7569	2.8393	2.8384	2.9112
Methyl 4,8-decadienoate	215.163	C11H18O2	7.0436	Lipids and lipid-like molecules	3.1284	2.9605	3.2392	3.1918	3.1592	3.1344	3.1179	3.036	3.022	3.0153	3.1141	3.0524	3.2025	3.0906	3.1133	3.1096	3.3106	3.2886	3.0695	3.1126	3.0361	3.0135
Stearidonic acid	259.205	C18H28O2	7.0436	Lipids and lipid-like molecules	2.7552	2.7318	2.68	2.7534	2.5739	2.6111	2.829	2.3299	2.6609	2.5995	2.612	2.5752	2.7345	2.6781	2.5873	2.8146	2.8401	2.7513	2.521	2.6826	2.481	2.576
3,4-Dimethyl-5-propyl-2-furantridecanoic acid	373.269	C22H38O3	7.0436	-	4.3502	4.186	4.4182	4.3577	4.3634	4.3229	4.2873	4.1652	4.1771	4.2319	4.2938	4.2012	4.3083	4.2782	4.2952	4.249	4.439	4.4648	4.2425	4.2383	4.2098	4.2053
16-Hydroxy-10-oxohexadecanoic acid	267.196	C16H30O4	7.08898	Lipids and lipid-like molecules	2.4136	2.2404	2.5011	2.5768	2.4231	2.4803	2.6468	2.5513	2.4933	2.434	2.4783	2.6308	2.4957	2.4533	2.4853	2.5305	2.5961	2.6348	2.5717	2.4916	2.5166	2.6278
Myristoleic acid	271.191	C14H26O2	7.08898	Lipids and lipid-like molecules	3.0275	2.9929	2.9599	3.1562	3.0146	3.0053	3.1768	3.0808	2.9396	2.9957	3.0724	3.2058	3.2176	3.288	3.3197	3.2292	3.2974	3.2401	3.2122	3.1752	3.2196	3.243
(+)-4,11-Eudesmadien-3-one	219.173	C15H22O	7.13693	Lipids and lipid-like molecules	3.0942	2.9992	3.0176	2.9994	3.085	3.0064	2.9319	3.0255	2.973	3.0216	2.9708	2.9865	2.8981	2.9108	2.9953	2.9172	2.9337	2.9195	2.9198	2.948	2.9704	2.9573
9,11-methane-epoxy PGF1alpha	353.266	C21H36O4	7.19027	-	3.403	3.2817	3.1557	3.1421	3.1454	3.1511	3.2185	3.0053	2.9158	2.7682	3.0043	3.2025	3.0056	3.1474	2.826	3.2853	2.9773	3.0517	3.133	3.174	3.161	3.1315
()13-HpODE	295.226	C18H32O4	7.2221	-	4.816	4.8342	4.6984	4.6812	4.6229	4.7125	4.6311	4.4482	4.4707	4.3747	4.5125	4.6252	4.6489	4.7275	4.5584	4.6262	4.6544	4.6824	4.6023	4.5777	4.5649	4.5844
4,8,12,15-Octadecatetraenoic acid	259.204	C18H28O2	7.23275	Lipids and lipid-like molecules	2.4495	2.5411	2.2898	2.0612	2.2304	2.3615	2.2387	2.1157	1.7949	1.9692	2.0904	2.1876	2.2142	2.3581	1.726	2.0659	2.1212	2.2237	2.3084	2.2994	2.2876	2.2076
9,12,13-TriHOME	329.232	C18H34O5	7.25682	Lipids and lipid-like molecules	2.0312	2.157	1.5613	1.8791	1.7653	1.6974	1.8453	1.8231	1.8929	1.7288	1.7737	1.912	1.9084	1.976	1.9553	2.0754	1.8818	2.0587	1.9375	1.9162	1.9166	1.842
2-Cyclotetradecen-1-one	253.18	C14H24O	7.27865	Organic oxygen compounds	2.3747	2.3093	2.219	2.3847	2.4131	2.3054	2.2587	2.1111	2.3785	2.2774	2.4447	2.3402	2.1194	2.3447	2.2725	2.178	2.0628	2.1651	2.2578	2.262	2.2954	2.2532
(Z,Z)-3,6-Dodecadien-1-ol	205.158	C12H22O	7.29525	Lipids and lipid-like molecules	1.7686	1.4699	1.7149	1.743	1.9919	1.8844	1.6398	2.0164	1.8487	1.9044	1.9466	1.6522	2.1787	1.6749	1.3066	1.4851	1.57	1.4376	2.2335	2.2711	2.2255	2.2379
Collettiside I	575.357	C33H52O8	7.3228	Lipids and lipid-like molecules	3.1833	3.3145	3.5108	3.4813	3.2966	3.2467	3.2036	3.0477	3.177	3.1955	3.1672	3.2493	2.614	2.754	2.8566	2.7167	2.6881	2.6454	2.9932	2.9438	3.0214	2.9848
Rishitin	255.194	C14H22O2	7.32675	Organooxygen compounds	3.0781	3.1528	2.8195	2.9741	2.8768	2.9807	2.912	2.7538	2.7712	2.6532	2.741	2.8912	2.9197	3.0506	2.8852	2.8508	2.9114	2.8909	2.9486	2.8584	2.883	2.8783
Longifolenaldehyde	221.189	C15H24O	7.34942	-	1.934	2.3298	1.5341	0.875	3.1024	1.8093	1.6814	1.4273	1.3711	1.345	0.7448	0.7499	2.7612	2.5085	2.9349	2.0323	2.8278	1.809	2.38	2.3761	2.353	2.3499
(S)-10,16-Dihydroxyhexadecanoic acid	311.221	C16H32O4	7.36025	Lipids and lipid-like molecules	4.8093	4.7238	4.7355	4.7128	4.6185	4.7148	4.5675	4.4005	4.502	4.3439	4.4888	4.6061	4.6064	4.6902	4.5143	4.6014	4.6015	4.6572	4.6141	4.5747	4.5622	4.5652
(1alpha,4beta,5beta)-4-Hydroxy-7(11),10(14)-guaiadien-8-one	267.194	C15H22O2	7.36025	Lipids and lipid-like molecules	2.5506	2.4436	2.5575	2.5654	2.5087	2.4968	2.4826	2.3188	2.3025	2.1782	2.2807	2.4949	2.4487	2.3883	2.4371	2.5446	2.4524	2.5552	2.4805	2.4691	2.4445	2.4301
Carboprost Tromethamine	403.226	C21H36O5	7.37147	Lipids and lipid-like molecules	2.5985	2.4545	2.8325	2.7302	2.6827	2.7231	2.6151	2.6092	2.7251	2.7225	2.7183	2.6768	2.6453	2.5247	2.6061	2.5008	2.7469	2.7411	2.6156	2.6864	2.6525	2.6298
13-Hydroxy-9-methoxy-10-oxo-11-octadecenoic acid	325.236	C19H34O5	7.40308	Lipids and lipid-like molecules	2.608	2.4734	2.5292	2.4507	2.2417	2.3014	2.4472	2.2504	2.1581	2.1703	2.35	2.5354	1.996	2.163	1.9879	2.0147	1.9087	1.813	2.26	2.2608	2.2578	2.3244
Monic acid	343.211	C18H30O6	7.40308	Lipids and lipid-like molecules	3.1585	3.4036	2.8954	3.1122	3.0236	3.0719	2.9518	2.7017	2.8118	2.7506	2.8914	2.9485	3.1177	3.248	3.1627	3.0454	3.1055	3.0726	2.9902	2.9344	2.9254	2.9358
13-epi-12-oxo Phytodienoic Acid	293.21	C18H28O3	7.40308	-	4.5292	4.4841	4.3845	4.4464	4.3038	4.3449	4.2714	4.0848	4.2075	4.0474	4.1943	4.3623	4.2549	4.3539	4.1975	4.314	4.1831	4.2753	4.3806	4.3504	4.3425	4.3648
(1S,2S,4R,8R)-p-Menthane-1,2,9-triol	211.132	C10H20O3	7.42458	Lipids and lipid-like molecules	2.194	2.1985	2.0718	2.1765	1.9243	2.0081	1.9729	1.8028	1.887	1.7631	1.9318	2.0693	1.9183	2.1326	1.8056	2.0228	1.7547	1.9815	2.1267	2.0138	2.0267	2.0636
3-(5,6,6-Trimethylbicyclo[2.2.1]hept-1-yl)cyclohexanol	281.212	C16H28O	7.46613	Lipids and lipid-like molecules	4.0982	3.5542	3.9196	3.7983	3.8265	3.803	3.9863	3.8078	3.6859	3.6497	3.7458	3.9146	3.7985	3.8864	3.752	3.9368	3.94	3.9499	3.8312	3.8129	3.8479	3.8221
Nigericin	705.451	C40H68O11	7.4763	-	3.4639	3.6597	3.342	3.5232	3.3841	3.4671	3.3251	3.156	3.3176	3.1944	3.3281	3.4469	3.2782	3.2941	3.4707	3.3837	3.2879	3.3336	3.3473	3.3604	3.3051	3.393
Hexadecanedioic acid	285.207	C16H30O4	7.4763	Lipids and lipid-like molecules	2.7664	2.5702	2.591	2.605	2.6251	2.6808	2.9557	2.8266	2.6169	2.5149	2.6446	3.0199	2.7011	2.8936	2.7612	2.8372	3.2245	2.7752	2.7473	2.7384	2.8006	2.7532
Hydroxysintaxanthin 5,6-epoxide	504.346	C31H42O3	7.47808	Lipids and lipid-like molecules	2.8153	2.6674	2.7512	2.8015	2.4381	2.6572	2.682	2.4518	2.5137	2.4628	2.5935	2.6874	2.5012	2.5817	2.5854	2.4682	2.4927	2.3039	2.8088	2.746	2.7307	2.7337
Pubesenolide	491.333	C28H42O5	7.53257	Lipids and lipid-like molecules	2.917	2.8478	2.9162	2.9525	2.8278	2.9212	2.7843	2.7723	2.7918	2.7484	2.8384	2.8041	2.6793	2.7847	2.6675	2.7035	2.7668	2.6678	2.9293	2.9332	2.8922	2.8509
Vinaginsenoside R14	801.458	C41H70O15	7.54213	Lipids and lipid-like molecules	2.7524	2.9646	2.7003	2.9617	2.7144	2.8252	2.4516	2.2831	2.5794	2.2718	2.5997	2.6905	2.5566	2.5864	2.7915	2.5951	2.4296	2.545	2.6189	2.7072	2.5967	2.675
LysoPC(18:3(9Z,12Z,15Z))	562.32	C26H48NO7P	7.54213	Lipids and lipid-like molecules	3.3191	3.3493	3.1788	3.2686	3.1686	3.2681	3.2196	3.0637	3.0425	2.9836	3.1337	3.2808	3.2553	3.0391	3.4426	3.203	3.2692	3.2761	3.2146	3.196	3.2011	3.1919
Auberganol	241.215	C15H28O2	7.54273	Lipids and lipid-like molecules	2.0098	1.8521	1.9816	2.0267	1.8793	1.872	1.8753	1.5086	1.6747	1.6	1.8082	1.8477	1.5181	1.9456	1.4916	1.4729	1.5703	1.6186	1.8666	1.8331	1.719	1.718
Germacrenone	283.192	C15H26O2	7.5533	Lipids and lipid-like molecules	2.1651	1.6444	1.9243	1.3943	1.459	1.5537	1.9096	1.3936	1.4749	1.7894	1.6334	1.669	1.578	1.3816	2.7374	2.4628	2.0966	1.7892	1.6715	1.6994	1.69	1.7433
Bicyclo[4.4.0]dec-1-ene, 2-isopropyl-5-methyl-9-methylene-	205.194	C15H24	7.5759	-	2.2459	2.6963	2.2111	2.0647	2.9235	2.4662	2.3162	1.9258	1.8632	1.9232	1.8642	2.081	2.6088	2.3492	2.5396	2.0846	2.4558	1.983	2.3515	2.2805	2.2699	2.2632
Cis-3-Hexenyl hexanoate	243.16	C12H22O2	7.59645	Lipids and lipid-like molecules	1.8659	2.0307	1.8674	1.8812	1.7692	1.916	2.0637	1.5681	1.7174	1.6456	2.0108	2.042	2.3148	2.1511	2.3102	2.3869	2.3006	2.201	1.8935	1.9168	2.0719	2.0504
9(S)-HOTrE	277.215	C18H30O3	7.61757	-	4.6354	4.4706	4.5065	4.2962	4.3325	4.428	4.3081	4.238	4.0477	4.0236	4.0341	4.2171	4.0813	4.2476	3.8882	4.2036	4.298	4.1543	4.3465	4.3032	4.2869	4.3001
(10)-Gingerol	351.252	C21H34O4	7.65987	Benzenoids	3.7237	3.64	3.806	3.7387	3.6761	3.7959	3.5583	3.6165	3.5602	3.5883	3.6089	3.5828	3.5428	3.5381	3.4162	3.4311	3.5535	3.4959	3.8279	3.7839	3.7596	3.7673
5-Butyl-3,4-dimethyl-2-furanundecanoic acid	381.265	C21H36O3	7.69912	Lipids and lipid-like molecules	2.1554	1.5224	2.0693	1.7213	1.8449	1.6961	2.1365	1.3113	1.3367	1.365	0.9556	1.9043	1.7356	1.6817	1.8465	2.1733	2.1381	2.1146	1.7083	1.7103	1.8143	1.6887
PE(15:0/20:2(11Z,14Z))	752.515	C40H76NO8P	7.72007	Lipids and lipid-like molecules	5.0887	5.0646	5.1302	5.1861	5.218	5.2287	5.3803	5.4083	5.3892	5.4089	5.3963	5.3793	5.3436	5.3339	5.3822	5.3934	5.3438	5.3595	5.2512	5.3176	5.3544	5.3653
Spirolide D	708.489	C43H65NO7	7.7494	Organoheterocyclic compounds	5.2029	5.1909	5.2643	5.2912	5.3551	5.3458	5.4578	5.4937	5.4654	5.4767	5.4689	5.4635	5.4311	5.4297	5.465	5.4605	5.4243	5.4401	5.3611	5.4123	5.4185	5.4113
()12(13)-EpOME	295.228	C18H32O3	7.76062	-	5.3058	5.2733	5.1322	5.1503	5.1496	5.2161	5.254	5.1901	5.1001	5.0725	5.0928	5.2349	5.1197	5.1915	5.0404	5.1564	5.1521	5.1695	5.1671	5.1647	5.1708	5.1766
13S-hydroxyoctadecadienoic acid	341.233	C18H32O3	7.76062	Lipids and lipid-like molecules	4.2098	4.1551	4.0605	4.0349	4.0378	4.109	4.1573	4.0779	3.9891	3.9599	4.0004	4.1278	4.0023	4.0751	3.934	4.0186	4.0313	4.0492	4.0602	4.0519	4.0576	4.0488
1-Phenyl-1-pentanone	204.138	C11H14O	7.82855	Benzenoids	2.298	2.2168	2.2857	2.1359	2.6211	2.24	2.0504	2.4103	2.5834	2.3536	2.3595	2.2695	2.3059	2.2133	2.4829	2.328	2.1657	2.4363	1.9348	1.9254	1.8346	1.8983
PE(14:1(9Z)/20:4(8Z,11Z,14Z,17Z))	692.458	C39H68NO8P	7.93588	Lipids and lipid-like molecules	4.445	4.4162	4.4921	4.5081	4.5704	4.5746	4.9788	5.0027	5.0002	5.0185	4.9943	4.9774	4.9234	4.9092	4.9741	4.9731	4.9407	4.9658	4.6506	4.8335	4.9168	4.927
(Z)-8-Tetradecenal	233.189	C14H26O	7.94572	Lipids and lipid-like molecules	2.5992	2.8349	2.7937	2.6327	2.5573	2.6344	2.4238	2.6197	2.6002	2.5232	2.4887	2.54	2.5768	2.4551	2.4862	2.4897	2.404	2.4557	2.9835	2.988	2.9197	2.926
6alpha-Carissanol	285.205	C15H24O3	7.94572	Lipids and lipid-like molecules	2.342	2.3887	2.0393	2.3039	2.15	2.2589	2.1784	1.7938	1.6874	1.8055	1.7728	2.1568	1.9543	2.2949	2.167	2.189	2.0924	2.193	2.0633	2.0135	1.9279	2.1469
(1R,2R,4S)-p-Menthane-1,2,8-triol 8-glucoside	315.179	C16H30O8	7.96538	Organic oxygen compounds	2.3647	2.4657	2.6843	2.7039	2.7575	2.6835	2.5568	2.6235	2.6222	2.7805	2.6136	2.5926	2.6481	2.5725	2.6303	2.7164	2.5488	2.5956	2.6383	2.569	2.5296	2.5396
PE(14:1(9Z)/18:3(9Z,12Z,15Z))	648.432	C37H66NO8P	7.97505	Lipids and lipid-like molecules	4.5606	4.5597	4.6399	4.6738	4.7576	4.758	5.1063	5.1408	5.1349	5.1489	5.1332	5.1062	5.0731	5.0543	5.1271	5.1177	5.0832	5.1079	4.8454	5.0187	5.0603	5.0548
Glucosylsphingosine	444.332	C24H47NO7	7.97505	Lipids and lipid-like molecules	5.03	5.0569	5.1118	5.0891	5.1157	5.0924	4.948	4.9645	4.9479	4.9725	4.9524	4.9537	4.9019	4.8776	4.9473	4.9509	4.9073	4.9385	4.9552	4.9184	4.9012	4.9058
Alpha-CEHC	277.144	C16H22O4	7.9771	Organoheterocyclic compounds	0.609	0.8206	1.5323	1.4518	1.3376	1.5392	1.382	1.9467	1.6293	1.7178	1.4487	1.2052	1.5232	1.6715	1.0067	1.1784	1.5368	1.0807	1.2746	1.4195	1.4239	1.2441
LysoPE(0:0/18:0)	526.316	C23H48NO7P	7.9771	Lipids and lipid-like molecules	3.2782	3.3269	3.2673	3.3426	3.2165	3.3485	3.2545	3.2108	3.233	3.1333	3.1775	3.2765	3.1451	3.2054	3.2324	3.0557	3.1439	3.0937	3.2454	3.2615	3.2358	3.2438
P-Menthan-1-ol	179.141	C10H20O	7.98505	Lipids and lipid-like molecules	2.7185	2.6605	2.2523	2.5525	2.2256	2.5739	2.3917	2.2373	2.0713	1.2761	1.5649	2.2444	2.2382	2.4349	1.749	2.3287	2.0028	2.0749	2.5908	2.4813	2.5399	2.3001
LysoPC(18:2(9Z,12Z))	564.333	C26H50NO7P	7.99843	Lipids and lipid-like molecules	3.8238	3.9272	3.9398	4.072	3.818	4.0011	3.9184	3.8675	3.8785	3.8317	3.9271	3.983	3.9497	3.952	4.1971	3.8301	3.8968	3.9279	3.9764	3.966	3.9701	3.9663
Palmitoyl glucuronide	383.279	C22H42O7	8.00455	Lipids and lipid-like molecules	4.5898	4.6192	4.6864	4.684	4.7186	4.6946	4.6232	4.6598	4.6497	4.6703	4.6596	4.6339	4.5845	4.5802	4.6284	4.6255	4.6003	4.6068	4.5922	4.5823	4.5936	4.5966
Alpha-Linolenic acid	557.456	C18H30O2	8.01405	Lipids and lipid-like molecules	3.8335	3.7428	3.4949	3.4133	3.3481	3.6092	3.5875	3.3144	3.1252	3.0043	3.1394	3.465	3.2808	3.4967	2.8572	3.3661	3.2254	3.23	3.6665	3.6053	3.6072	3.5987
Agavoside A	591.349	C33H52O9	8.0301	Lipids and lipid-like molecules	2.7287	2.6489	2.9603	2.93	2.8767	2.9016	2.8152	2.9787	2.8799	2.6915	2.7109	2.8739	2.7162	2.6667	2.7923	2.4534	2.911	2.6841	2.8015	2.7795	2.7724	2.8127
3-Oxotetradecanoic acid	241.181	C14H26O3	8.0301	Lipids and lipid-like molecules	1.5292	1.0908	1.8976	1.8204	1.7386	1.6544	1.7298	1.7423	1.6725	1.5862	1.6447	1.5909	1.4698	1.3532	1.5348	0.984	1.5987	1.759	1.5909	1.6245	1.6449	1.641
Cyclopassifloic acid E	573.343	C31H52O8	8.04143	Lipids and lipid-like molecules	2.2859	2.2448	2.5128	2.4644	2.2631	2.4225	2.1995	2.0477	2.2117	1.8796	1.9283	2.3825	2.1409	2.0154	2.2312	1.8781	2.0107	1.9147	2.0526	2.1813	2.1092	2.2539
5-Hydroxy-2-benzyl-1,3-dioxane	227.126	C11H14O3	8.04455	Organoheterocyclic compounds	3.0329	3.0727	3.1873	3.1603	3.183	3.1765	3.1128	3.1518	3.2343	3.2381	3.1596	3.0652	3.0418	3.032	3.126	3.1015	3.001	3.066	3.093	3.0646	3.0515	3.0604
PC(DiMe(9,3)/MonoMe(11,3))	869.54	C45H79NO10P+	8.0631	Lipids and lipid-like molecules	2.5454	2.5562	2.4009	2.5965	2.5272	2.5647	2.1546	1.6414	1.9919	1.6802	1.7932	2.4325	1.9596	1.9047	2.1323	1.9449	1.8478	1.2294	2.1797	2.1033	2.2021	2.1942
13(S)-HOTrE	295.226	C18H30O3	8.06438	-	5.2641	5.1904	5.0052	5.0009	4.8907	5.0656	4.9394	4.8278	4.7409	4.6192	4.7301	4.9348	4.7854	4.9155	4.6276	4.8691	4.7123	4.7452	5.1292	5.1125	5.1059	5.1069
Sterol	249.22	C17H28O	8.06438	Lipids and lipid-like molecules	2.6686	2.2741	2.845	2.3714	2.2261	2.903	2.4737	2.0451	1.3226	1.7253	1.5243	2.0947	2.2442	2.3663	1.7665	2.4193	2.6271	2.4685	2.8634	2.953	2.7795	2.7594
Leukotriene B4	335.221	C20H32O4	8.07327	Lipids and lipid-like molecules	2.1248	1.9908	1.8925	1.8901	1.9038	1.9469	2.0916	1.7131	2.0201	1.6857	1.6742	2.1171	2.0408	2.2591	2.0113	2.3565	2.1135	2.2975	2.0001	1.9598	2.0557	2.0018
2-hydroxy-3-phenylpropanal	183.1	C9H10O2	8.07437	Benzenoids	1.4982	1.8828	1.9508	2.1409	1.9597	1.5685	1.8499	2.1927	1.998	2.1504	2.1502	2.1427	1.818	1.7465	1.972	1.9763	1.8558	2.0156	1.5223	1.5422	1.6495	1.7362
11-Oxohexadecanoic acid	269.212	C16H30O3	8.08443	Lipids and lipid-like molecules	2.2378	2.2763	2.1398	2.1924	2.1452	2.2302	2.0291	1.9281	2.1894	1.9456	2.114	2.1977	2.1105	2.2012	2.2605	2.0713	2.1185	2.0655	2.097	2.1953	2.1273	2.1592
Sagittariol	351.254	C20H34O2	8.08443	Lipids and lipid-like molecules	2.6395	2.3921	2.5373	2.5581	2.3943	2.599	2.6002	2.5505	2.4633	2.4793	2.3195	2.6362	1.9646	2.0955	2.0379	2.2984	1.8447	2.0116	2.3735	2.3729	2.3731	2.4108
PS(22:2(13Z,16Z)/15:0)	766.531	C43H80NO10P	8.1252	Lipids and lipid-like molecules	3.1775	3.1601	3.2544	3.23	3.2767	3.258	3.3308	3.3333	3.3255	3.3394	3.3101	3.2915	3.2817	3.2983	3.3439	3.3178	3.297	3.2996	3.2779	3.3428	3.3064	3.2684
Antibiotic X 14889C	649.348	C33H58O10	8.16008	Lipids and lipid-like molecules	3.7863	3.9003	3.4873	3.621	3.6111	3.8671	3.6375	3.5521	3.5047	3.5545	3.4506	3.7128	3.6155	3.6848	3.7251	3.5691	3.6217	3.6664	3.6978	3.6909	3.6754	3.7114
Ethisterone	311.202	C21H28O2	8.18127	Lipids and lipid-like molecules	1.282	0.8365	0.8	1.1733	0.827	1.2533	2.7525	1.4327	2.4887	2.6994	2.6281	2.4232	2.0216	1.3616	2.439	1.4439	2.979	2.2616	2.1527	2.0712	2.123	2.0982
Trilobalicin	609.434	C35H62O8	8.23525	Lipids and lipid-like molecules	2.7618	2.608	2.9738	3.1912	3.4041	2.9803	2.6366	2.7965	2.3058	1.8478	2.2281	2.4911	2.2554	2.3741	2.4009	2.5813	2.0719	2.2141	2.7162	2.6445	2.6709	2.7134
1-Linoleoylglycerophosphocholine	520.339	C26H50NO7P	8.2367	Lipids and lipid-like molecules	3.9195	4.1579	4.0954	4.3207	3.9865	4.2509	4.0821	3.9299	3.9888	3.8945	4.0882	4.1168	4.2185	4.2003	4.4129	3.9275	4.0629	4.1116	4.2007	4.1734	4.1775	4.1597
1-Oleoylglycerophosphoserine	544.268	C24H46NO9P	8.24558	Lipids and lipid-like molecules	2.2829	2.7132	2.8265	2.9303	2.6109	2.7142	2.6807	2.3976	2.376	2.4638	2.5289	2.6689	2.4167	1.9824	2.6691	2.362	2.5212	2.5345	2.658	2.6003	2.5931	2.571
8-Oxohexadecanoic acid	269.212	C16H30O3	8.26692	Lipids and lipid-like molecules	2.4087	2.3185	2.1543	2.177	2.2578	2.2923	2.1598	2.1009	2.1312	1.7667	2.1216	2.2219	2.2335	2.2884	2.2075	2.134	2.1345	2.1776	2.1456	2.2058	2.1726	2.0957
2-Hydroxymyristic Acid	243.196	C14H28O3	8.29908	Lipids and lipid-like molecules	3.1265	2.8542	3.2279	3.1711	3.1714	3.0836	3.1032	3.0773	2.9479	2.9087	3.1039	3.0828	3.0644	3.063	3.0984	2.846	3.1163	3.1612	3.1059	3.0522	3.0903	3.0829
LysoPC(16:0)	540.332	C24H50NO7P	8.35225	Lipids and lipid-like molecules	3.8561	4.0936	3.9795	4.159	3.8475	4.1133	3.9668	3.9164	3.983	3.8875	3.9785	3.9984	4.061	4.0118	4.1906	3.8805	3.9825	3.9825	4.1075	4.0777	4.0862	4.0695
28-Homobrassinolide	515.331	C29H50O6	8.36225	Lipids and lipid-like molecules	3.123	3.1109	3.0108	3.0471	3.1023	3.1293	3.0391	2.8718	2.8827	2.9027	2.9505	3.1172	2.788	2.9244	2.8602	2.8415	2.9236	2.8072	2.9752	2.9754	2.9282	2.9203
2-(5,8-Tetradecadienyl)cyclobutanone	304.263	C18H30O	8.36902	Organooxygen compounds	2.8528	2.7567	2.8033	2.7807	2.7957	2.734	2.6982	2.7126	2.6773	2.7478	2.6899	2.6692	2.6087	2.6178	2.6537	2.6939	2.6383	2.6599	2.6355	2.5958	2.6208	2.6388
Protobassic acid	549.344	C30H48O6	8.40342	Lipids and lipid-like molecules	2.5246	2.5412	2.6725	2.5402	2.7487	2.6532	2.6721	2.444	2.3587	2.2405	2.3883	2.5353	2.8343	2.8002	2.5437	2.4909	2.6793	2.595	2.6537	2.6417	2.6417	2.6606
Psychosine	462.34	C24H47NO7	8.43035	-	2.1159	1.6978	2.0596	1.9791	1.9715	1.7598	2.2787	2.1621	0.8786	0.5954	0.9927	2.1592	1.6133	1.9261	1.9593	1.7982	2.2238	2.0651	1.9773	1.8057	1.8173	1.8883
Asparagoside A	559.365	C33H54O8	8.4774	Lipids and lipid-like molecules	2.865	2.8125	3.005	2.9882	2.8471	2.9892	2.6568	2.659	2.5242	2.6607	2.5573	2.7338	2.0387	2.324	1.9518	2.1439	2.3549	1.8935	2.5659	2.5686	2.5829	2.5012
LysoPC(18:1(9Z))	566.346	C26H52NO7P	8.48792	Lipids and lipid-like molecules	2.7577	2.6918	2.6293	2.6383	2.6602	2.7555	2.5733	2.6097	2.4031	2.1522	2.4929	2.7581	2.7538	3.0154	2.7361	2.5793	2.9659	2.5994	2.7038	2.6751	2.6966	2.6579
14,15-DiHETrE	375.195	C20H34O4	8.5304	Lipids and lipid-like molecules	1.2321	1.6159	0.6301	0.9408	1.7354	1.4513	1.4974	1.0693	1.6351	1.2232	1.5365	1.532	1.3451	1.7019	1.623	1.5491	1.5971	1.4368	1.4745	1.5191	1.5509	1.4941
Ganoderic acid alpha	616.345	C32H46O9	8.55468	Lipids and lipid-like molecules	1.083	1.9292	1.3698	1.7976	0.8029	1.7981	1.5522	1.1586	1.376	0.7603	1.1064	1.1303	1.8705	2.2358	1.9068	1.563	1.8378	1.9608	1.8851	1.8387	1.7719	1.8287
PC(16:0/0:0)[U]	496.339	C24H50NO7P	8.58535	-	4.0809	4.4859	4.3483	4.5299	4.1698	4.5319	4.3138	4.2228	4.319	4.1941	4.3332	4.2621	4.4596	4.4507	4.5831	4.207	4.4161	4.3695	4.4435	4.4429	4.4412	4.4157
15-OxoEDE	323.257	C20H34O3	8.61635	-	2.55	2.6848	2.3152	2.3963	2.1418	2.5889	2.6814	2.0829	1.8672	1.4418	1.9938	2.2341	2.0623	2.4244	2.02	2.1318	2.1789	2.0514	2.6109	2.5885	2.5499	2.5437
9(S)-HpODE	311.222	C18H32O4	8.6274	Lipids and lipid-like molecules	1.7965	1.9857	1.8052	1.7301	1.7112	1.9797	1.7473	1.4084	0.721	1.1449	0.7413	1.3438	1.6617	1.6608	1.9151	1.8835	2.0495	2.0918	1.4738	1.3342	1.3631	1.5631
Obscuraminol A	278.247	C18H31NO	8.66802	-	3.438	3.8272	3.618	3.6158	3.3144	2.3017	3.6222	3.5325	3.5866	3.5371	3.665	3.499	3.5014	3.7432	3.5593	3.4138	3.6357	3.5378	3.8576	3.8505	3.8457	3.8162
12,13-DiHODE	333.202	C18H32O4	8.6804	Lipids and lipid-like molecules	2.0637	1.7056	2.044	1.8385	2.0005	1.6683	2.1499	1.8544	1.7256	1.5729	1.7828	2.2155	1.7816	1.6181	1.8235	2.4083	2.1605	2.0681	2.0069	1.8516	2.0487	1.9535
LysoPE(0:0/20:0)	554.347	C25H52NO7P	8.70123	Lipids and lipid-like molecules	0.9488	2.5108	2.3435	2.526	0.1312	2.5443	1.6966	2.0943	2.1239	1.9368	2.1984	1.9	2.4658	1.6971	2.6261	0.8415	2.3437	2.2511	2.3553	2.1999	2.3218	2.2031
Androsterone glucuronide	501.224	C25H38O8	8.71757	Lipids and lipid-like molecules	1.5194	2.1293	1.469	2.2562	1.9062	2.5022	2.2479	2.4909	2.2858	2.4948	2.5105	2.3564	2.5763	1.972	2.8908	2.2915	2.8266	2.8062	2.3403	2.4123	2.3793	2.4619
Palmitoleamide	254.247	C16H31NO	8.73033	-	3.6745	4.0548	3.8934	3.8864	3.6629	1.5853	3.8428	3.7978	3.8428	3.7578	3.9023	3.7562	3.8379	4.0155	3.8334	3.6999	3.9214	3.832	4.1431	4.1182	4.1137	4.0969
Ganoderic acid V	563.315	C32H48O6	8.78122	Lipids and lipid-like molecules	3.296	3.4284	3.3147	3.3017	3.5117	3.4144	3.8331	3.3543	3.421	3.3441	3.3845	3.3561	3.5102	3.5783	3.3868	3.1479	3.4822	3.5475	3.4241	3.433	3.4079	3.3876
Solasodine	396.328	C27H43NO2	8.8655	Lipids and lipid-like molecules	2.8994	2.7591	2.5636	2.6099	2.7253	2.9233	2.5172	2.489	2.5285	2.5036	2.4541	2.5166	2.3993	2.6764	2.4119	2.5495	2.4624	2.4541	2.7215	2.5468	2.5419	2.5887
(2xi,20beta)-2,20-Dihydroxy-3-oxo-12-ursen-28-oic acid	531.335	C30H46O5	8.96988	Lipids and lipid-like molecules	2.1167	1.5776	1.5015	1.6446	1.4092	1.4335	1.7005	1.3001	0.8341	1.3456	1.4179	1.8737	2.4498	2.5758	2.3297	2.1439	2.4462	2.4343	1.9382	1.9385	1.9593	1.9343
Linoleamide	280.263	C18H33NO	8.98998	Lipids and lipid-like molecules	4.8987	5.3598	5.1449	5.1154	4.9143	3.1746	5.0842	5.0308	5.0407	4.9458	5.1155	4.9705	5.1261	5.286	5.0892	4.8961	5.202	5.0628	5.3782	5.342	5.3181	5.3266
Farnesyl acetone	263.236	C18H30O	8.98998	-	3.438	3.9305	3.7088	3.6777	3.4553	1.5259	3.6283	3.6025	3.6032	3.504	3.6956	3.5536	3.6798	3.8543	3.6726	3.4667	3.7721	3.6387	3.9347	3.9156	3.8703	3.8774
Maslinic Acid	473.36	C30H48O4	9.00048	Lipids and lipid-like molecules	3.1423	3.2244	3.2783	3.3156	3.0089	3.3926	3.0825	3.0155	2.9972	3.1466	3.0667	3.015	2.5739	2.2978	2.4717	2.4119	2.453	2.456	3.5012	3.4606	3.4136	3.4123
Roccellic acid	299.223	C17H32O4	9.00105	-	0.0118	1.216	0.0105	1.3031	1.4146	1.3	1.2228	0.8686	0.0097	0.603	1.6311	0.0111	1.3543	1.5486	1.5363	1.0286	1.7491	1.7659	1.1501	1.2405	1.3202	1.3068
2-hydroxyhexadecanoic acid	271.228	C16H32O3	9.02187	Lipids and lipid-like molecules	3.932	4.153	4.5408	4.4054	4.5895	3.8834	4.1944	4.3643	3.9592	4.0521	4.3506	4.2175	4.4788	4.2139	4.2011	4.3042	4.1688	4.3434	4.4604	4.4743	4.4926	4.4773
L-Urobilinogen	617.333	C33H48N4O6	9.04205	Organoheterocyclic compounds	2.0248	0.0127	0.012	0.0129	0.0125	0.9704	0.0124	1.195	0.0111	1.3044	1.6749	1.3044	2.78	2.7132	2.5937	2.2933	2.5819	2.7274	1.9979	1.8491	1.9287	1.7884
2-Linoleoyl Glycerol	377.266	C21H38O4	9.05165	-	2.6516	2.5066	2.9077	2.9932	3.0196	3.1465	2.8758	3.0119	3.0671	3.1563	3.0362	2.9586	3.0426	3.0373	2.9294	2.9314	3.3179	3.0845	2.967	2.9565	2.9431	2.9498
LPA(18:2(9Z,12Z)/0:0)	435.25	C21H39O7P	9.12965	Lipids and lipid-like molecules	3.6244	3.7274	3.6145	3.8529	3.7791	4.0363	3.7525	3.8088	3.7238	3.7472	3.8107	3.7811	3.9153	3.8121	4.0664	3.7364	4.0906	4.062	3.8268	3.8277	3.8235	3.8102
LysoPE(0:0/24:1(15Z))	598.361	C29H58NO7P	9.14337	Lipids and lipid-like molecules	1.5721	0.5871	0.1564	0.7464	0.1625	1.2777	0.1612	0.1496	0.1464	0.134	1.1705	0.1634	2.6508	2.7369	2.6052	2.0598	2.6322	2.6142	2.0309	1.9228	1.9276	1.8279
Hovenolactone	533.347	C30H48O5	9.14337	Benzenoids	2.9645	2.923	2.8063	2.7098	3.2487	2.8035	2.972	3.0675	3.1324	2.7087	3.134	2.9951	3.4861	3.6441	3.3373	3.1266	3.3557	3.4875	3.1579	3.1978	3.2262	3.2192
N,N-Dimethylaniline	122.095	C8H11N	9.18198	Organic nitrogen compounds	2.6022	2.3349	2.5657	2.5602	2.6189	2.4683	2.3406	2.5218	2.572	2.5662	2.339	2.538	2.0197	2.1137	2.4796	2.5435	2.1695	2.3871	2.1088	1.9995	2.1734	2.2431
7a,12a-Dihydroxy-cholestene-3-one	461.328	C27H44O3	9.18437	Lipids and lipid-like molecules	2.6407	2.4738	2.5984	2.5938	2.4194	2.3548	2.7193	2.5118	2.5193	2.4741	2.6262	2.7034	2.514	2.5413	2.4874	2.54	2.5554	2.3853	2.5933	2.5884	2.6424	2.5999
PG(16:0/0:0)[U]	483.274	C22H45O9P	9.24653	-	4.0221	4.1903	4.0936	4.2309	3.9378	4.0866	3.995	3.8734	3.9771	3.9027	3.9156	4.0541	4.0972	4.0091	4.2507	3.9895	4.1438	4.1762	4.1172	4.1014	4.107	4.1204
3,4-Dimethyl-5-pentyl-2-furantridecanoic acid	423.312	C24H42O3	9.30935	-	2.0283	1.9921	1.9991	1.9715	1.8667	2.0078	1.5182	1.4741	1.7676	1.5684	1.7682	1.7587	1.9629	2.0674	2.0599	1.8818	2.0342	1.9255	1.8876	1.9321	1.8562	1.7889
Soyasaponin I	977.483	C48H78O18	9.31953	Lipids and lipid-like molecules	1.3164	1.1773	1.4811	1.8567	1.8241	1.8102	1.6721	1.7131	1.9105	1.7925	1.856	1.6482	1.3717	0.9181	1.7636	1.3852	1.739	2.0056	1.7094	1.6791	1.6543	1.6494
Oleamide	282.279	C18H35NO	9.35163	Lipids and lipid-like molecules	5.3852	5.9014	5.7496	5.6444	5.5448	3.9967	5.6019	5.5929	5.5358	5.433	5.655	5.4534	5.76	5.8246	5.6594	5.4688	5.8015	5.6078	5.9166	5.9095	5.8634	5.8924
()-(Z)-2-(5-Tetradecenyl)cyclobutanone	265.252	C18H32O	9.36197	Organic oxygen compounds	3.1498	3.7016	3.5109	3.4688	3.2766	0.7845	3.4102	3.3235	3.328	3.1823	3.4131	3.2566	3.5415	3.5631	3.461	3.2851	3.5994	3.3811	3.6656	3.6438	3.6417	3.6479
(3beta,5alpha,9alpha,22E,24R)-3,5,9-Trihydroxy-23-methylergosta-7,22-dien-6-one	503.338	C29H46O4	9.39252	Lipids and lipid-like molecules	2.852	2.3411	2.7326	2.5508	2.7549	2.7681	2.7237	2.8011	2.6504	2.6067	2.7167	2.8556	2.4114	2.4617	2.4278	2.5663	2.3766	2.3389	2.5163	2.5244	2.6009	2.3585
(24R)-Ergost-4-ene-3,6-dione	457.333	C28H44O2	9.47985	-	3.7696	3.4444	3.5213	3.4567	3.5655	3.4219	3.7473	3.626	3.4947	3.5807	3.5875	3.7252	3.175	3.2107	3.1587	3.4085	3.2194	3.198	3.4343	3.4268	3.4417	3.4441
DL-2-hydroxy stearic acid	299.259	C18H36O3	9.60133	-	2.0137	2.5551	2.9316	2.8713	2.8563	2.2861	2.4708	2.7095	2.4001	2.2959	2.6933	2.4208	2.9581	2.6731	2.5674	2.5135	2.6895	2.7659	2.8618	2.9199	2.9037	2.9005
1-Palmitoyl Lysophosphatidic Acid	393.24	C19H39O7P	9.60845	-	3.5302	3.8669	3.6747	3.9894	3.8698	4.0532	3.8542	3.9803	3.9019	3.8851	3.8984	3.7733	3.9548	3.9741	4.0674	3.79	4.16	4.1218	3.9092	3.8756	3.9022	3.927
7-Ketocholesterol	445.333	C27H44O2	9.62183	Lipids and lipid-like molecules	0.7084	1.5629	0.8209	1.4302	1.2462	2.168	1.6026	0.9911	0.9862	0.9167	1.6915	1.4957	1.0657	1.5684	1.2988	1.1161	1.3457	0.7451	1.3829	1.3653	1.4096	1.4334
Spirolide B	716.454	C42H63NO7	9.65995	Organoheterocyclic compounds	2.6545	3.0241	2.8136	2.8531	2.8239	3.2502	2.8237	2.9227	2.9044	2.8805	2.8808	2.7663	2.8672	3.0303	2.9055	2.7521	3.0462	2.927	3.0063	3.0176	2.9803	2.9277
3,4-Dimethyl-5-pentyl-2-furanpentadecanoic acid	451.343	C26H46O3	9.86882	Lipids and lipid-like molecules	0.8027	2.0107	0.7593	1.3364	0.7758	1.8468	1.2632	0.7677	0.7313	0.6952	0.7518	0.8352	1.7617	1.9614	1.8556	0.8987	2.148	1.3018	1.6688	1.8104	1.7063	1.7293
15-hydroxyicosanoic acid	370.342	C20H40O3	9.87293	Lipids and lipid-like molecules	2.4088	3.209	3.02	2.8729	2.7633	2.4339	2.8092	2.7791	2.6942	2.5255	2.9534	2.6585	3.1087	3.1617	2.9585	2.6948	3.1719	2.8687	3.2315	3.2103	3.132	3.2122
PE(20:3(5Z,8Z,11Z)/22:1(13Z))	844.576	C47H86NO8P	9.95215	Lipids and lipid-like molecules	0.001	2.504	1.5228	0.9934	0.0009	2.4778	1.6257	0.0008	0.0008	0.7018	0.6643	0.0009	1.1664	2.7175	1.1702	0.0009	1.9928	1.0646	1.9064	1.9233	1.9721	2.0243
Bis(2-ethylhexyl) phthalate	413.266	C24H38O4	9.9551	-	5.2606	5.1421	5.2006	5.1836	5.2235	5.1588	5.1659	5.1935	5.1606	5.224	5.1832	5.1369	5.0723	5.0517	5.1433	5.2093	5.0705	5.1045	5.1014	5.0974	5.0974	5.1093
Momordol	439.342	C26H48O5	10.1068	Lipids and lipid-like molecules	0.5324	2.3637	1.6457	1.7136	0.9986	1.9128	1.7971	1.0908	0.4157	0.3887	1.7287	1.6267	2.0245	2.4799	2.0256	1.6846	2.0776	1.8733	1.9855	2.1063	2.0576	2.0586
Cyclotricuspidogenin C	535.365	C31H52O7	10.1375	Lipids and lipid-like molecules	3.2345	3.4689	3.4042	3.2028	3.1555	3.5304	3.2228	3.4289	3.3507	3.1367	3.3558	3.2326	3.4104	3.605	3.4115	3.1274	3.387	3.375	3.4374	3.4315	3.4349	3.4431
AS 1-1	730.514	C38H71NO9	10.3326	Lipids and lipid-like molecules	1.5471	2.8218	2.5199	2.439	2.3423	2.705	2.5912	2.5763	2.4414	2.4667	2.7709	2.4367	2.3808	2.5757	2.2997	1.9714	2.6156	2.4389	2.6335	2.6909	2.6405	2.7087
4alpha-Formyl-5alpha-cholesta-8-en-3beta-ol	459.348	C28H46O2	10.364	Lipids and lipid-like molecules	2.3571	3.1318	3.1246	2.9896	2.7408	3.1465	3.1172	3.105	3.062	2.9585	3.1295	3.0262	3.1008	3.0883	3.074	2.8738	3.2133	3.071	3.2257	3.2553	3.2398	3.2217
13Z-Docosenamide	338.341	C22H43NO	10.3688	-	3.8787	3.9797	3.9665	3.9059	4.1195	4.581	3.9326	3.7866	3.7621	3.9635	3.8646	3.7202	4.2501	3.9296	3.8196	3.7355	3.8328	3.7048	4.1226	4.0636	4.0645	4.0501
1alpha-hydroxy-26,27-dimethylvitamin D3	429.372	C29H48O2	10.4924	-	3.9093	4.3328	4.2937	4.244	4.1127	4.4378	4.2812	4.2741	4.1479	4.1044	4.3043	4.0191	4.2754	4.4636	4.2948	4.0748	4.4059	4.2965	4.3301	4.3393	4.2732	4.2644
Maduramicin	951.515	C47H80O17	10.4928	Organic oxygen compounds	2.7303	2.4693	3.0661	3.1632	2.9531	2.9847	2.8308	2.9339	3.0536	3.0491	3.0064	3.0302	2.7936	2.454	2.8427	2.5353	2.6835	2.7541	2.7715	2.7773	2.7991	2.7346
Carbamazepine iminoquinone	459.136	C14H9NO	10.5559	Organoheterocyclic compounds	2.481	2.1126	2.3827	2.4006	2.451	2.1671	2.4577	2.5406	2.5113	2.5427	2.6484	2.5011	2.2428	2.0504	2.0662	2.4176	1.9903	2.304	2.2879	2.2402	2.2349	2.3535
Sucrose	365.105	C12H22O11	10.7817	Organic oxygen compounds	5.9729	5.7732	5.8672	5.8359	5.9295	5.7607	5.7962	5.8516	5.8415	5.893	5.8233	5.837	5.6906	5.6582	5.755	5.834	5.6794	5.7501	5.7103	5.7312	5.7381	5.7222
1-O-beta-D-Glucopyranosyl-2,3-di-O-palmitoylglycerol	751.538	C41H78O10	11.0626	Lipids and lipid-like molecules	1.8336	2.4548	2.8675	2.705	2.9719	3.1845	2.9767	3.0622	2.6356	2.9705	3.2417	2.8055	2.9293	3.0273	2.9255	2.894	3.1307	3.0295	3.1425	3.1043	3.1688	3.0881
PE(15:0/22:2(13Z,16Z))	802.566	C42H80NO8P	11.1746	Lipids and lipid-like molecules	3.0805	3.9914	3.8264	4.0475	3.686	4.0429	3.7751	3.6464	3.6949	3.6137	3.9152	3.7035	3.8473	3.5214	3.9081	3.4291	3.7445	3.5946	3.9201	3.9246	3.9317	3.8906
PE(18:2(9Z,12Z)/20:0)	816.581	C43H82NO8P	11.482	Lipids and lipid-like molecules	0.9366	1.5798	2.1523	1.9528	0.9083	2.4667	1.236	0.8782	1.5671	1.419	1.7589	1.5188	2.0313	1.6672	2.1471	0.8817	1.8687	1.5857	2.1428	2.1048	2.2676	2.217
3,4,5-trihydroxy-6-[4-(4-methyl-3-oxopentyl)phenoxy]oxane-2-carboxylic acid	389.119	C18H24O8	12.153	Organic oxygen compounds	4.2819	4.1297	4.1738	4.2219	4.2443	4.1213	4.2199	4.2752	4.2216	4.2671	4.1861	4.2214	4.1438	4.0921	4.1425	4.1728	4.0837	4.0987	4.1335	4.1422	4.1626	4.1435
Physapruin B	623.322	C34H50O9	12.1632	Lipids and lipid-like molecules	3.0741	2.9565	3.0342	3.0841	3.1102	3.0237	3.0498	3.1186	3.0546	3.1187	3.0767	2.9991	3.0199	2.8995	3.0244	3.0249	2.9007	2.9612	3.0034	3.0162	2.9963	2.9922
Quercetin 3-glucosyl-(1->2)-galactosyl-(1->2)-glucoside	787.195	C33H40O22	13.2068	Phenylpropanoids and polyketides	3.2176	3.0149	3.0591	3.1292	3.1834	2.9486	3.1641	3.1696	3.0672	3.0754	3.0609	3.0412	2.9894	2.9505	2.9745	3.0467	2.969	2.9138	3.0174	3.0522	3.0005	3.0192
3,3',5-Trihydroxy-4'-methoxy-6,7-methylenedioxyflavone 3-glucuronide	557.029	C23H20O14	14.0914	Phenylpropanoids and polyketides	2.2528	2.0809	2.1613	2.1255	2.3284	2.1089	2.2634	2.1418	2.3243	2.3274	2.1397	2.2625	1.9135	1.8444	2.165	2.1074	2.0851	1.975	2.2042	2.1684	2.2598	2.1771
N-gamma-Glutamyl-S-(1-propenyl)cysteine	354.108	C11H18N2O5S	14.1889	Organic acids and derivatives	1.4789	1.6622	1.6232	1.4043	1.1793	1.0279	1.6894	1.6788	1.6599	0.8487	1.5864	1.6528	1.7529	1.3182	1.6763	1.6427	1.5324	1.2818	1.6329	1.4785	1.5333	1.607
6-(2H-1,3-benzodioxole-5-carbonyloxy)-3,4,5-trihydroxyoxane-2-carboxylic acid	307.044	C14H14O10	14.1992	Phenylpropanoids and polyketides	2.0123	1.9576	2.0243	1.9935	1.9737	2.09	2.0884	2.0904	1.9547	2.1102	2.0362	2.0107	2.0409	1.9291	1.9997	2.1419	1.9477	2.0549	1.7634	1.7889	1.915	1.8907
5-Fluorouridine monophosphate	406.041	C9H12FN2O9P	14.2619	Nucleosides, nucleotides, and analogues	2.2395	2.2437	2.2691	2.2083	2.2375	2.2248	2.2028	2.1601	2.205	2.1959	2.1845	2.1286	2.1109	2.094	2.1488	2.1792	2.117	2.1743	2.2256	2.1472	2.2059	2.2002
3,4,5-trihydroxy-6-(5-hydroxy-1H-indole-3-carbonyloxy)oxane-2-carboxylic acid	392.04	C15H15NO9	14.3035	Organic oxygen compounds	1.6205	1.5963	1.5539	1.5299	1.5715	1.5626	1.4979	1.4506	1.4118	1.4369	1.4383	1.3154	1.3791	1.2391	1.2372	1.5104	1.5108	1.4271	1.4698	1.4077	1.4772	1.4439
Dihydrocarvone	153.126	C10H16O	14.3242	Lipids and lipid-like molecules	2.7837	2.7706	2.9319	2.7533	2.8383	2.7912	2.7088	2.7643	2.7662	2.7744	2.7401	2.6922	2.6977	2.7418	2.7592	2.8378	2.7304	2.7715	2.7316	2.6857	2.7535	2.7429
